# Supplementary material for: Pollen Grain Classification Based on Ensemble Transfer Learning on the Cretan Pollen Dataset
Source: MDPI journal article supplement (doi:10.3390/plants11070919), 2022-03-29
Supplement: s1 [file s1]

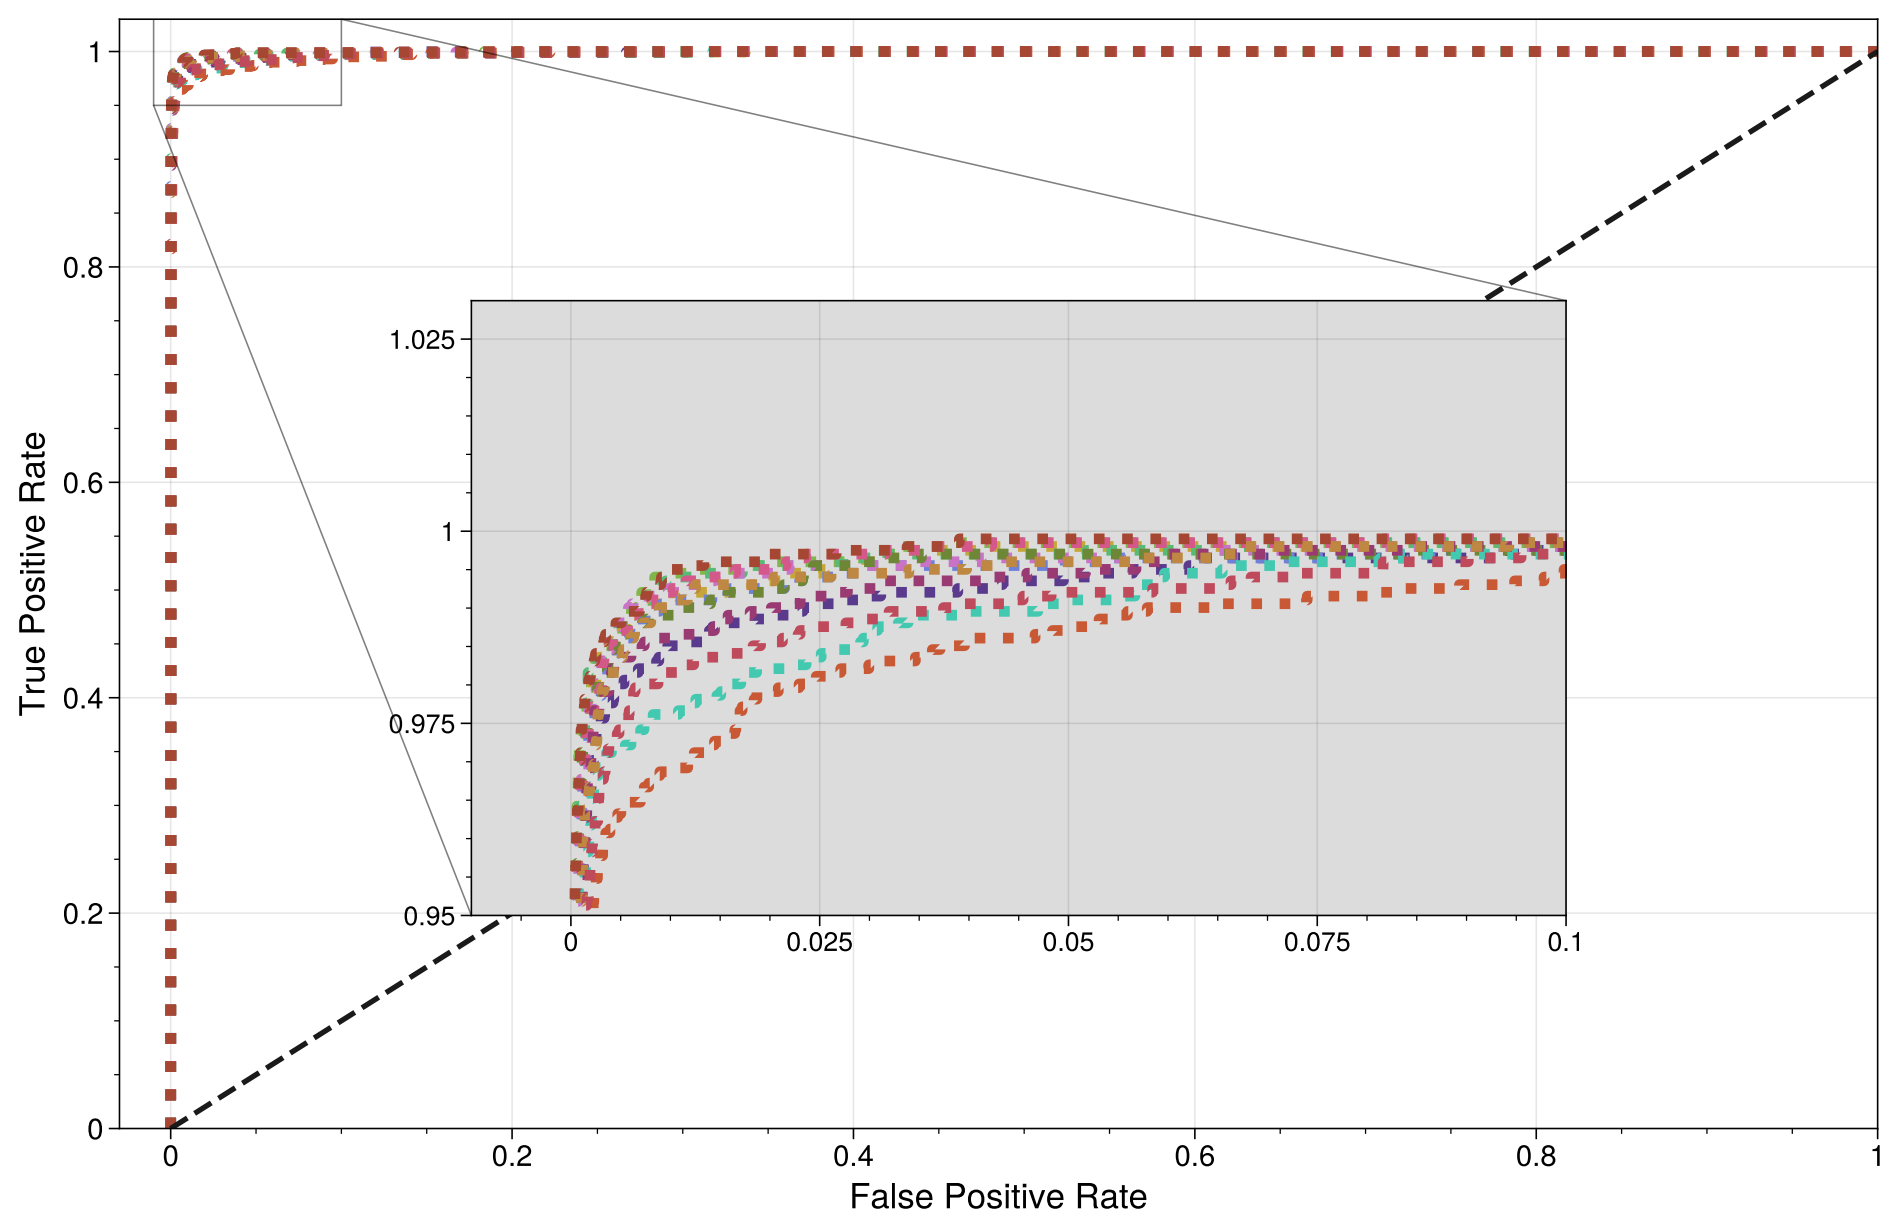

- |                                                          |                                                           |
|----------------------------------------------------------|-----------------------------------------------------------|
| ens_x_i_r_soft, micro-average ROC curve (area = 0.9996)  | ens_x_ir_r_soft, micro-average ROC curve (area = 0.9996)  |
| inception, micro-average ROC curve (area = 0.9988)       | xception, micro-average ROC curve (area = 0.9985)         |
| ens_x_r_soft, micro-average ROC curve (area = 0.9994)    | inception_resnet, micro-average ROC curve (area = 0.9979) |
| ens_ir_i_r_soft, micro-average ROC curve (area = 0.9994) | ens_x_ir_soft, micro-average ROC curve (area = 0.9991)    |
| ens_i_r_soft, micro-average ROC curve (area = 0.9993)    | ens_ir_r_soft, micro-average ROC curve (area = 0.9993)    |
| ens_x_i_soft, micro-average ROC curve (area = 0.9992)    | resnet, micro-average ROC curve (area = 0.9987)           |
|                                                          | ens_all_soft, micro-average ROC curve (area = 0.9996)     |
