# Supplementary figures and images for: Pollen Grain Classification Based on Ensemble Transfer Learning on the Cretan Pollen Dataset
Source: MDPI journal article supplement (doi:10.3390/plants11070919), 2022-03-29

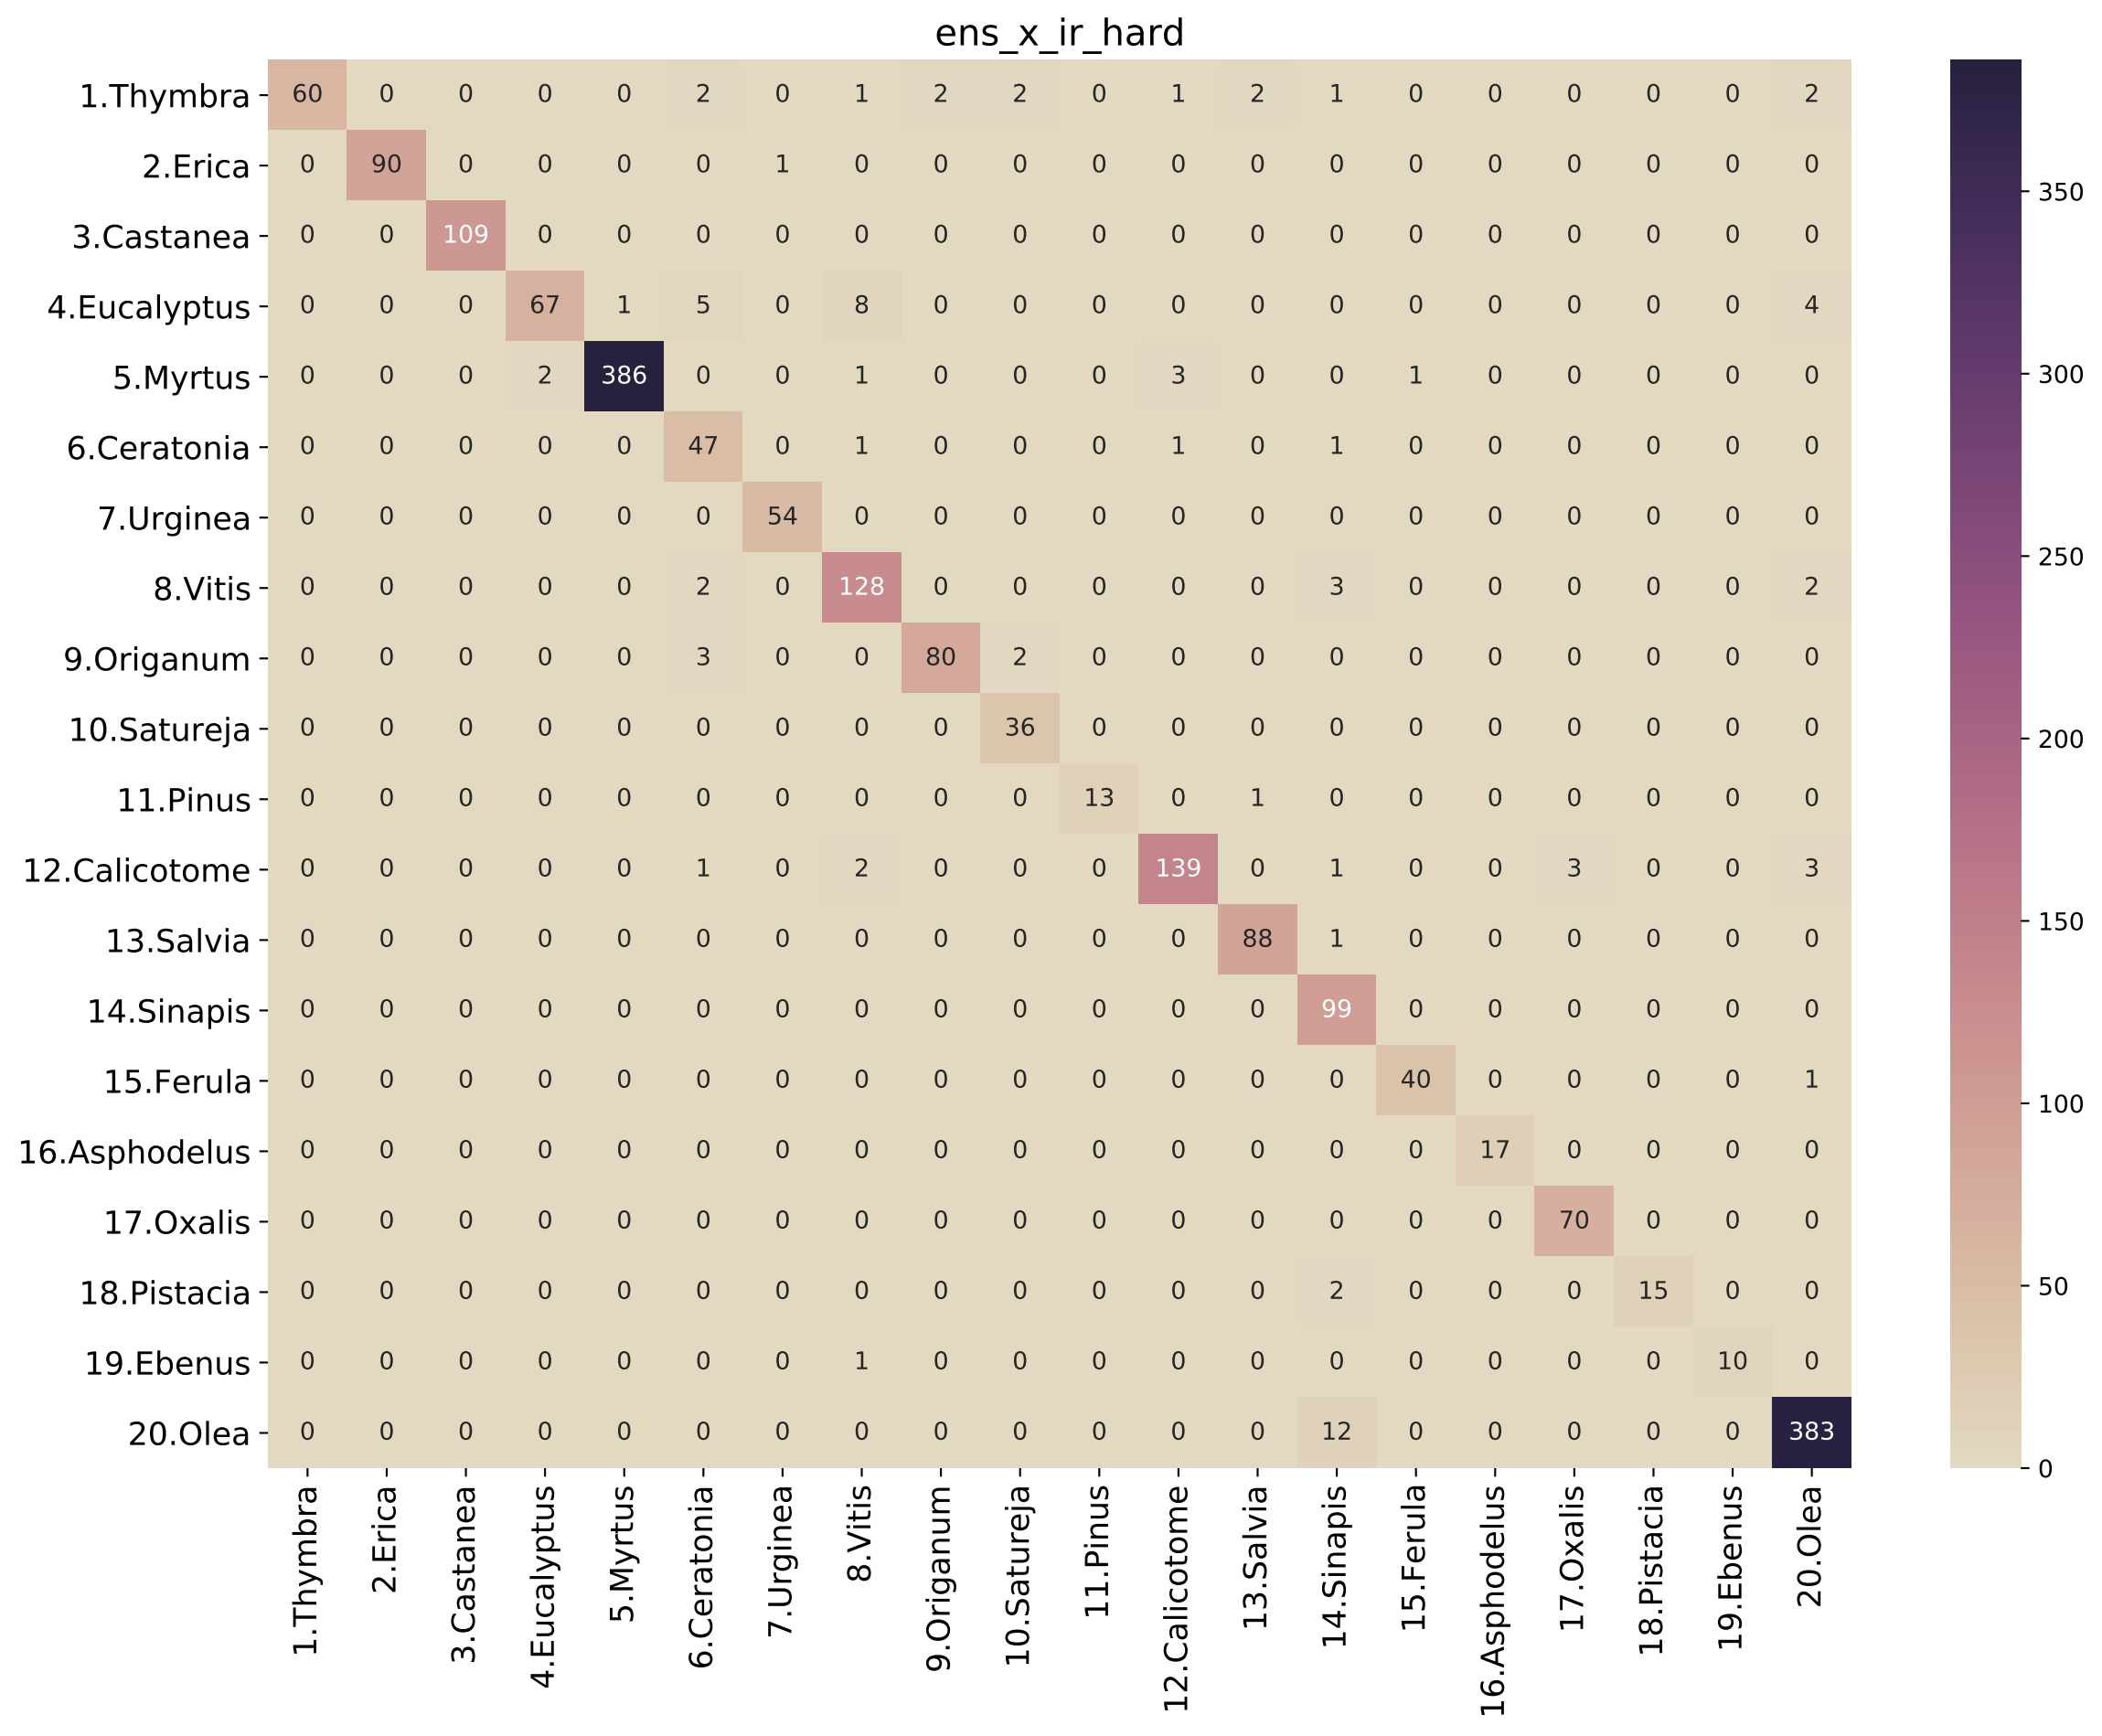

Supplement: s1 [file s1]

inception\_resnet

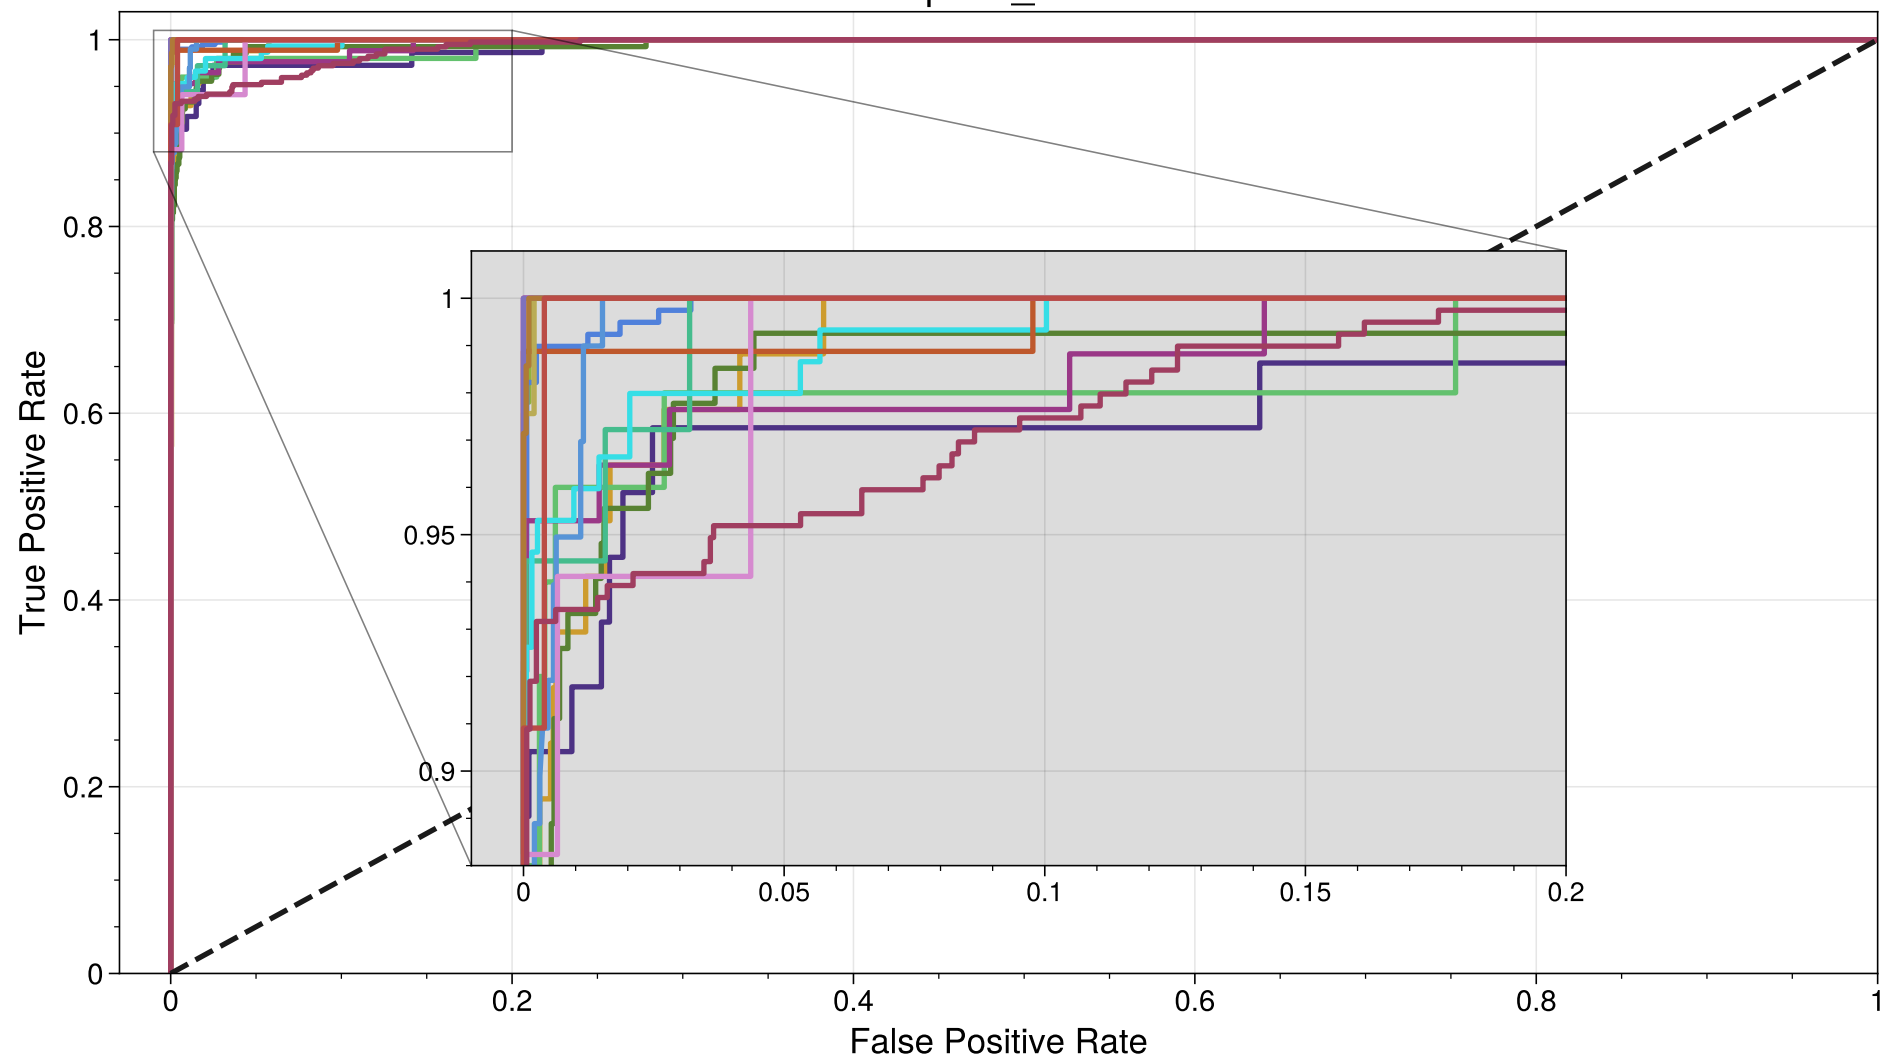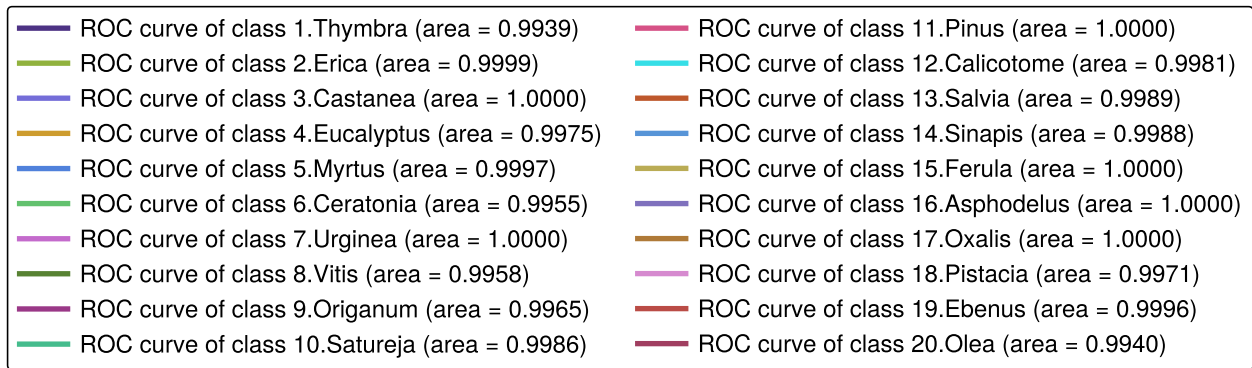

Supplement: s1 [file s1]

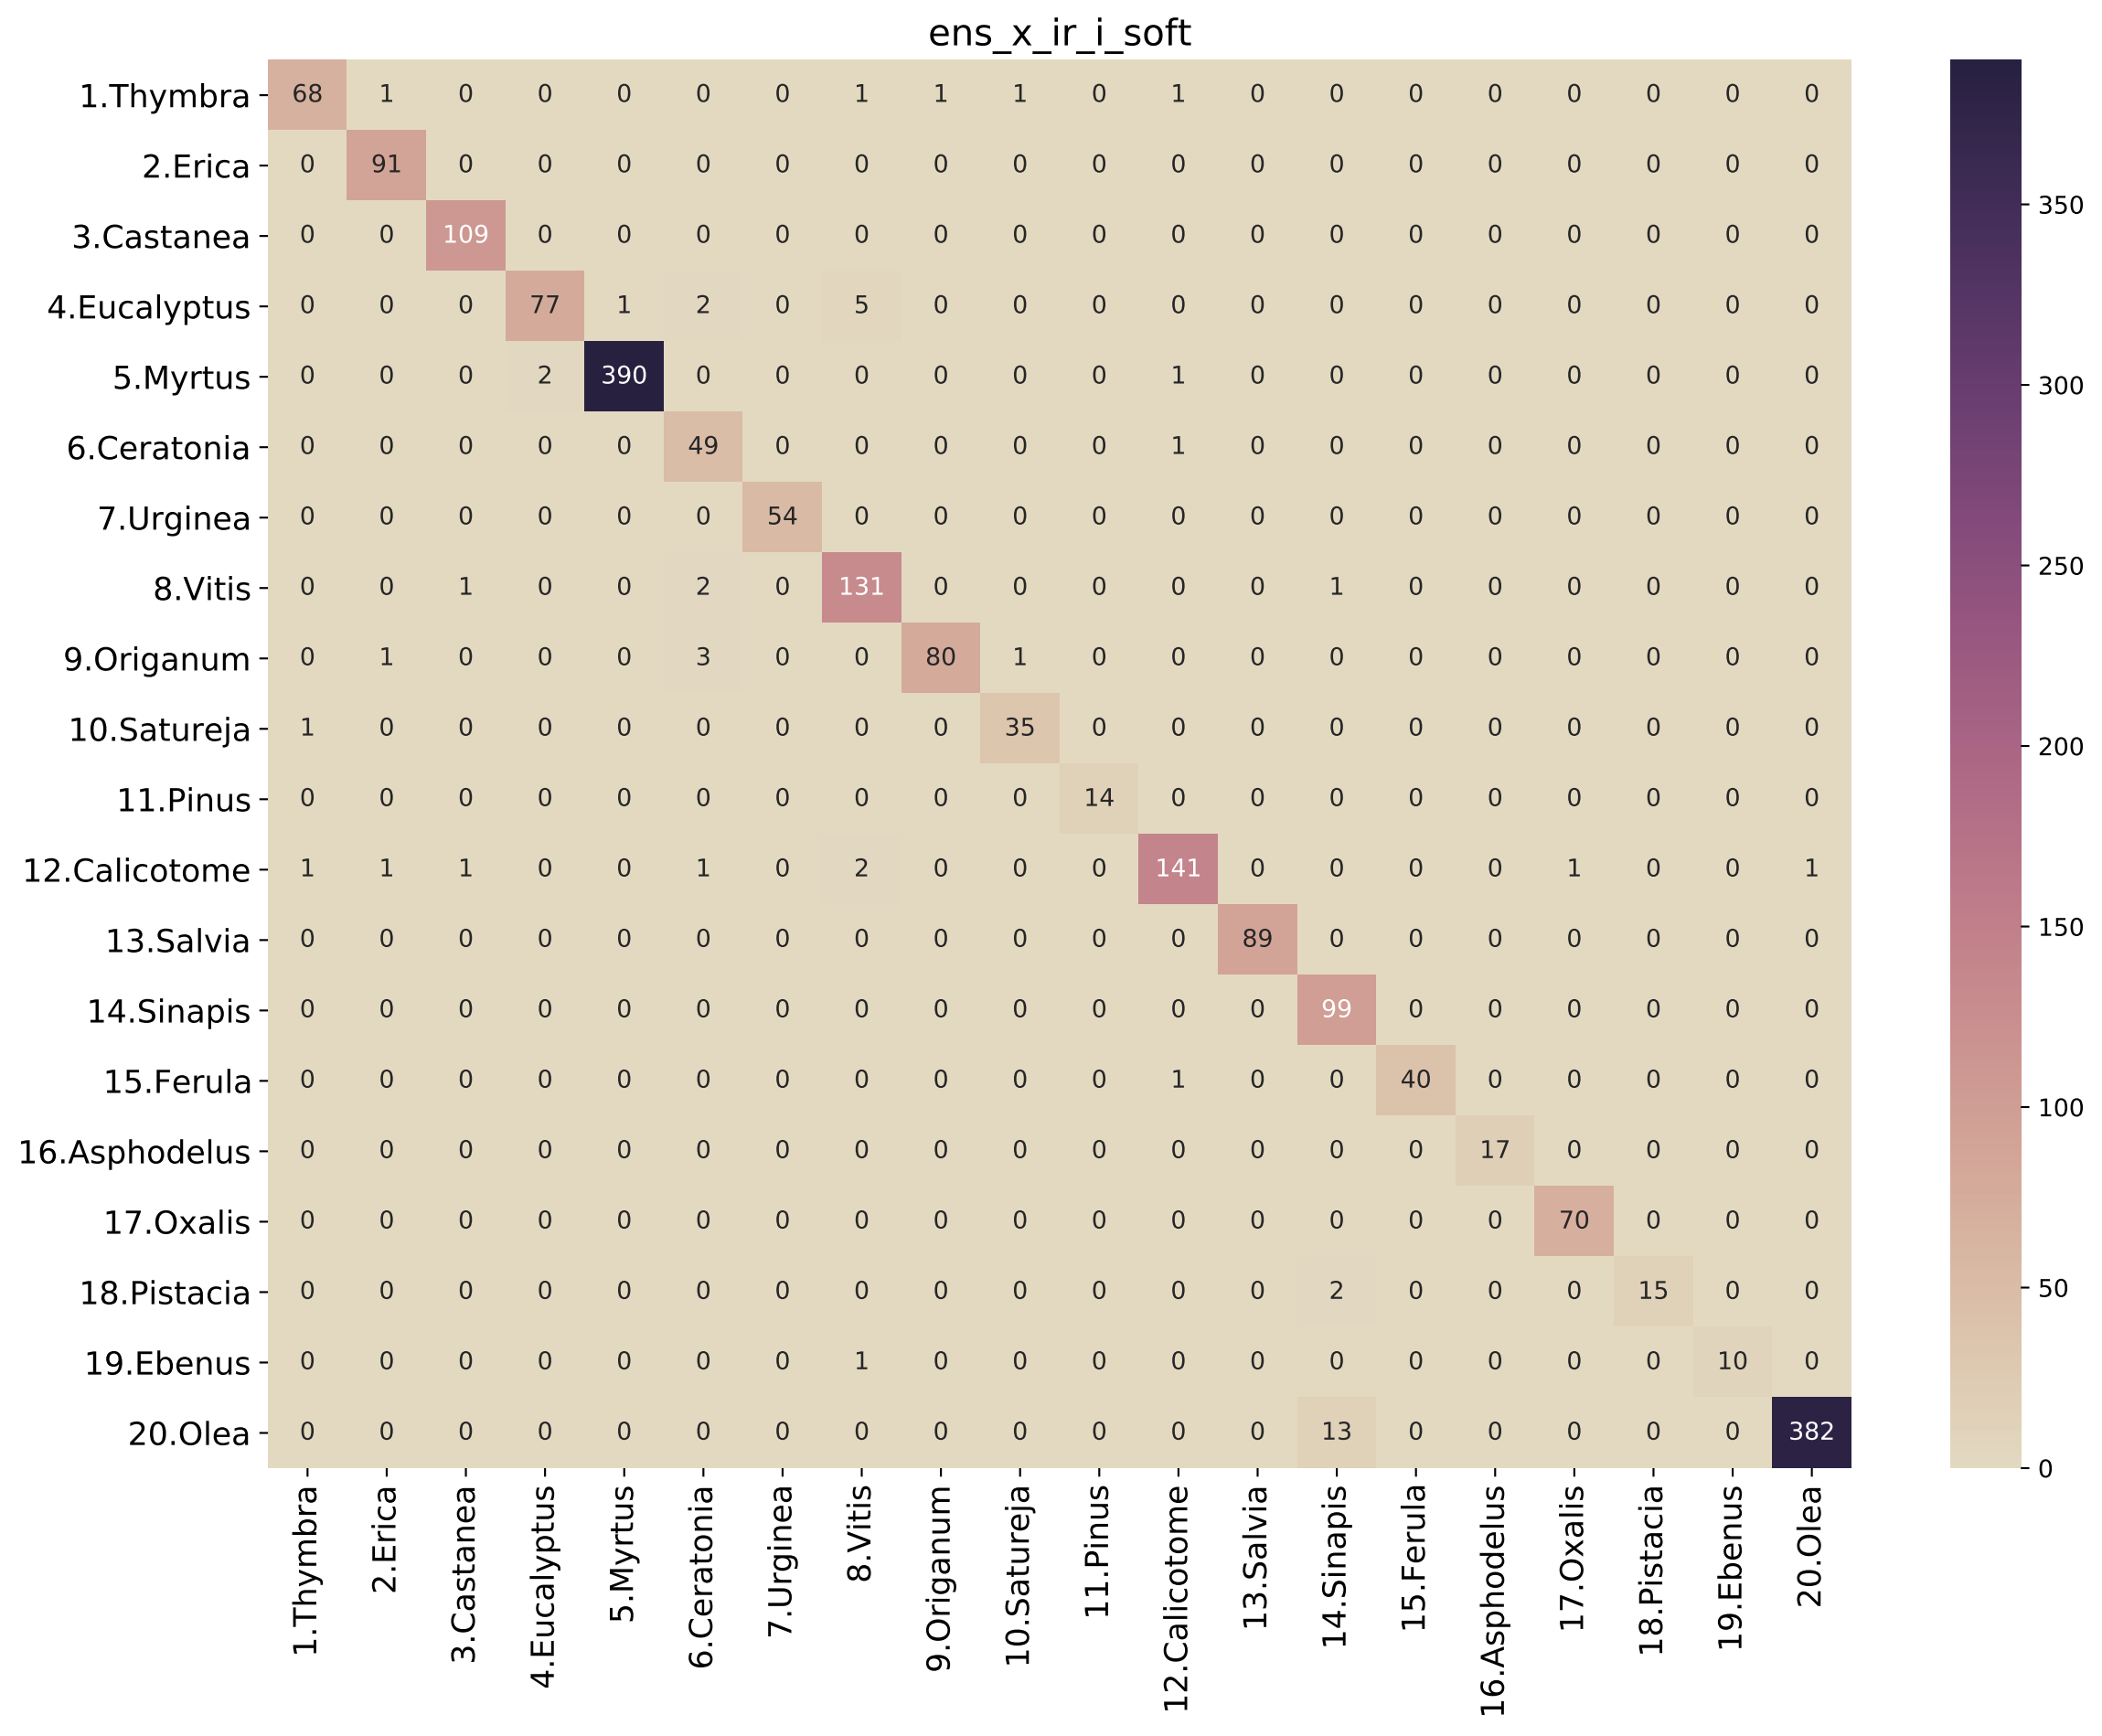

Supplement: s1 [file s1]

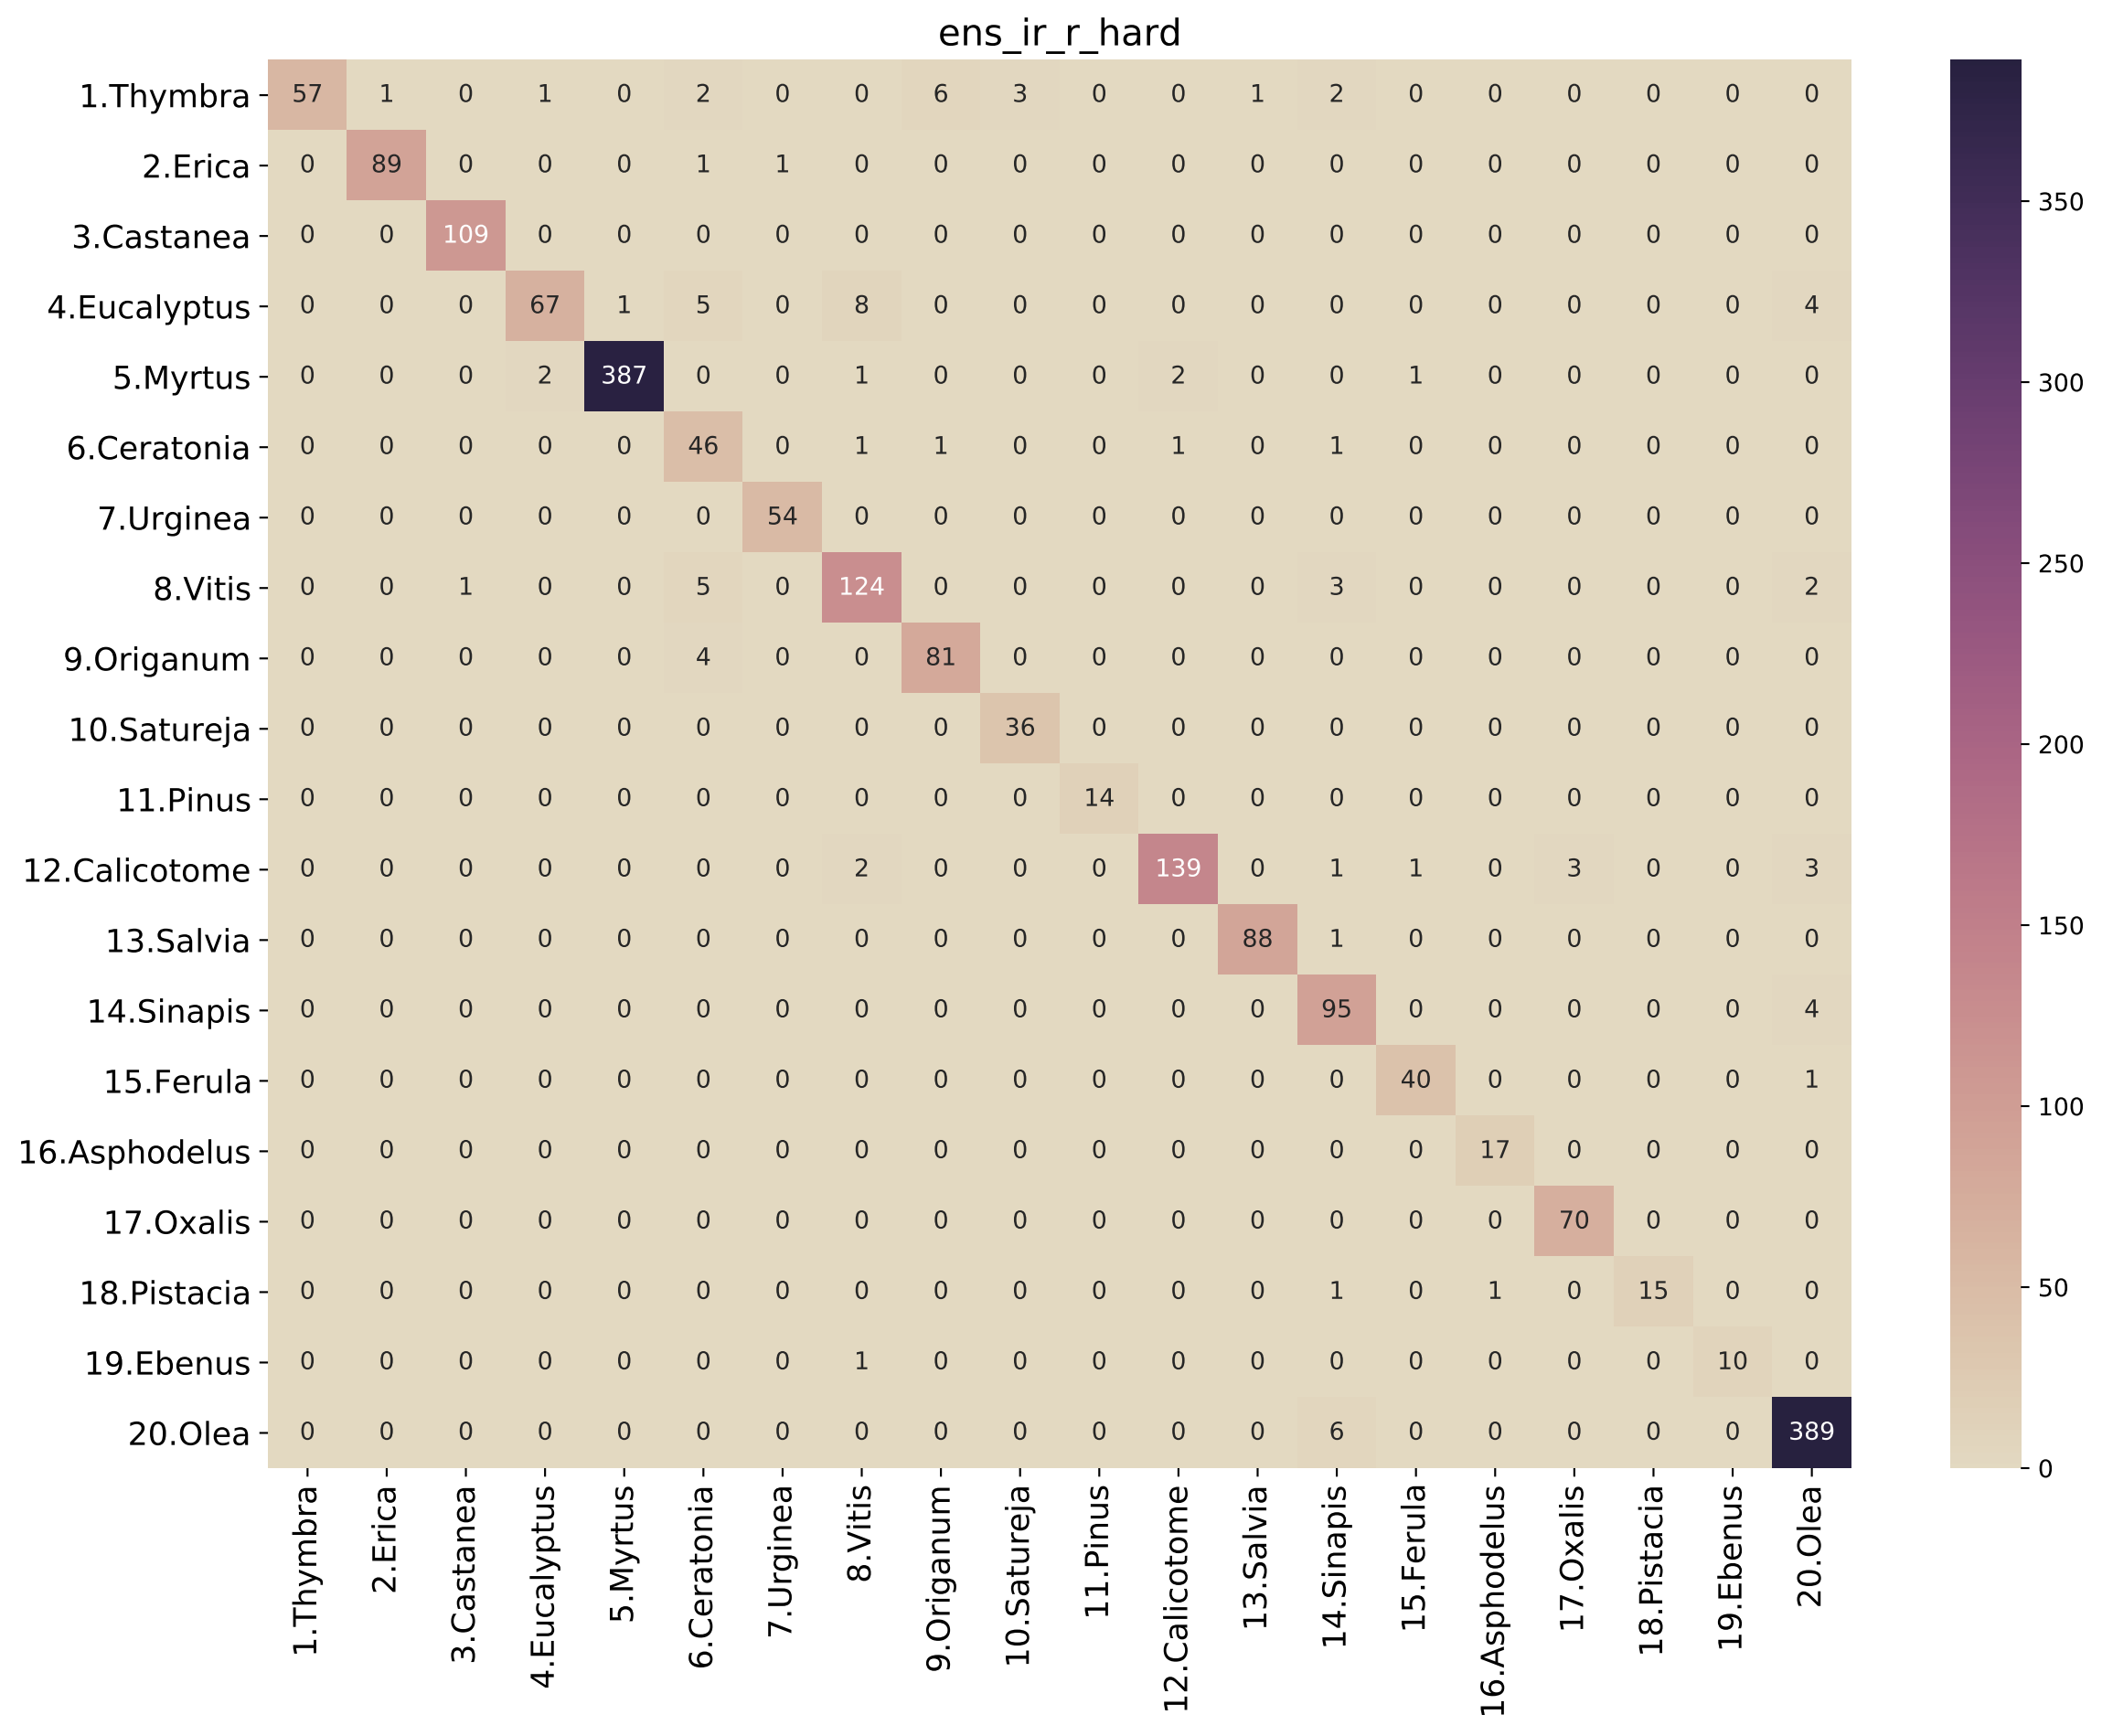

Supplement: s1 [file s1]

ens\_i\_r\_soft

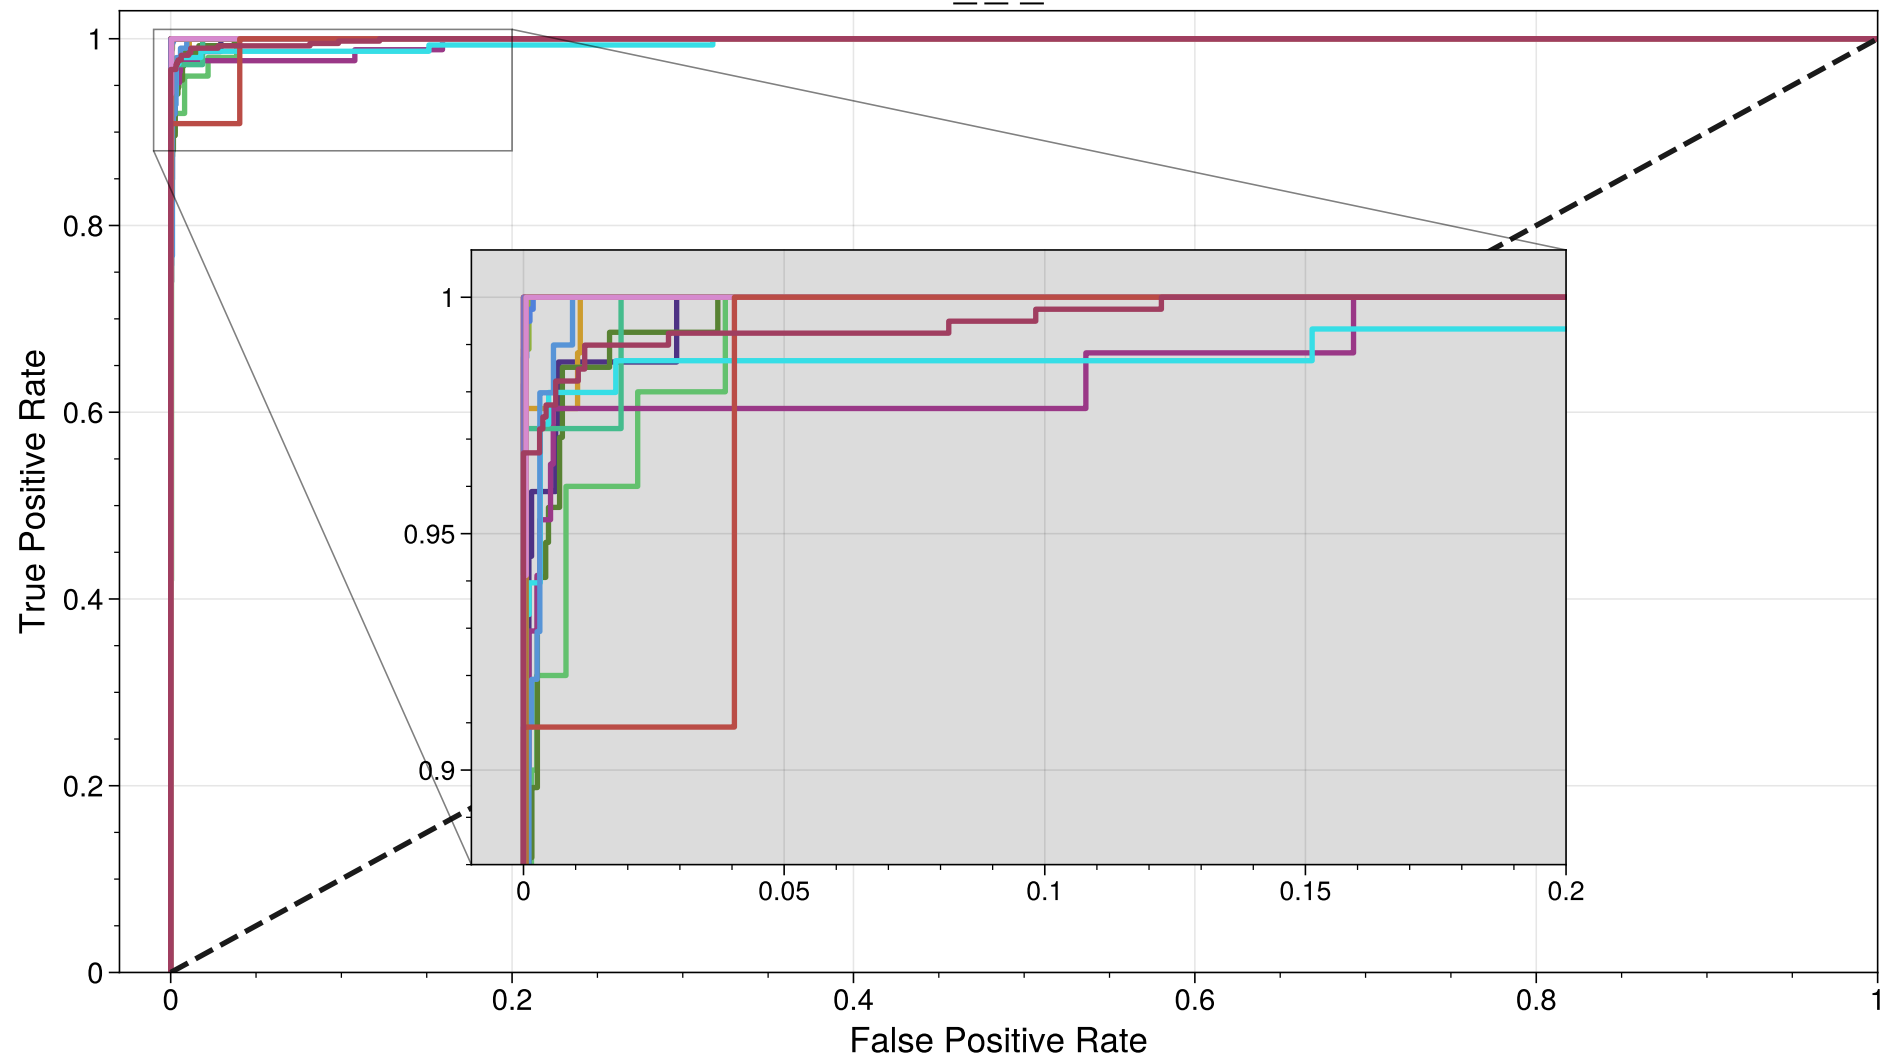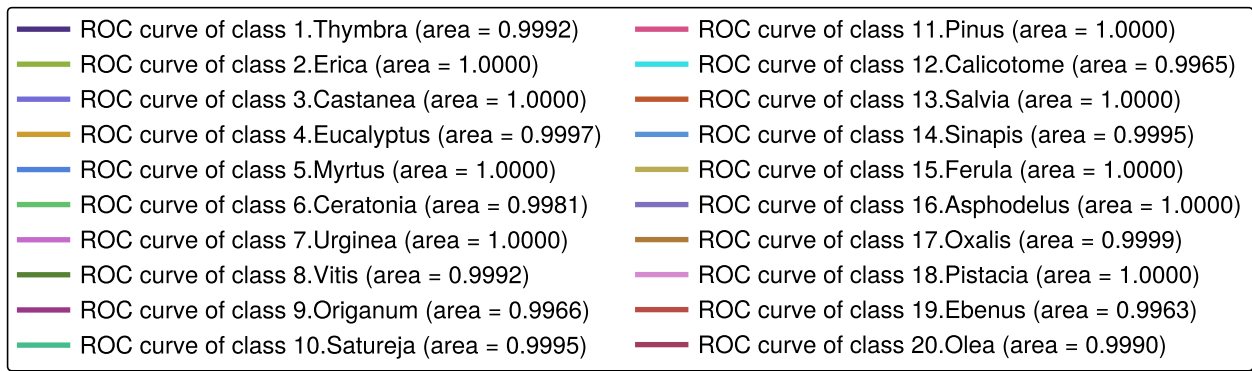

Supplement: s1 [file s1]

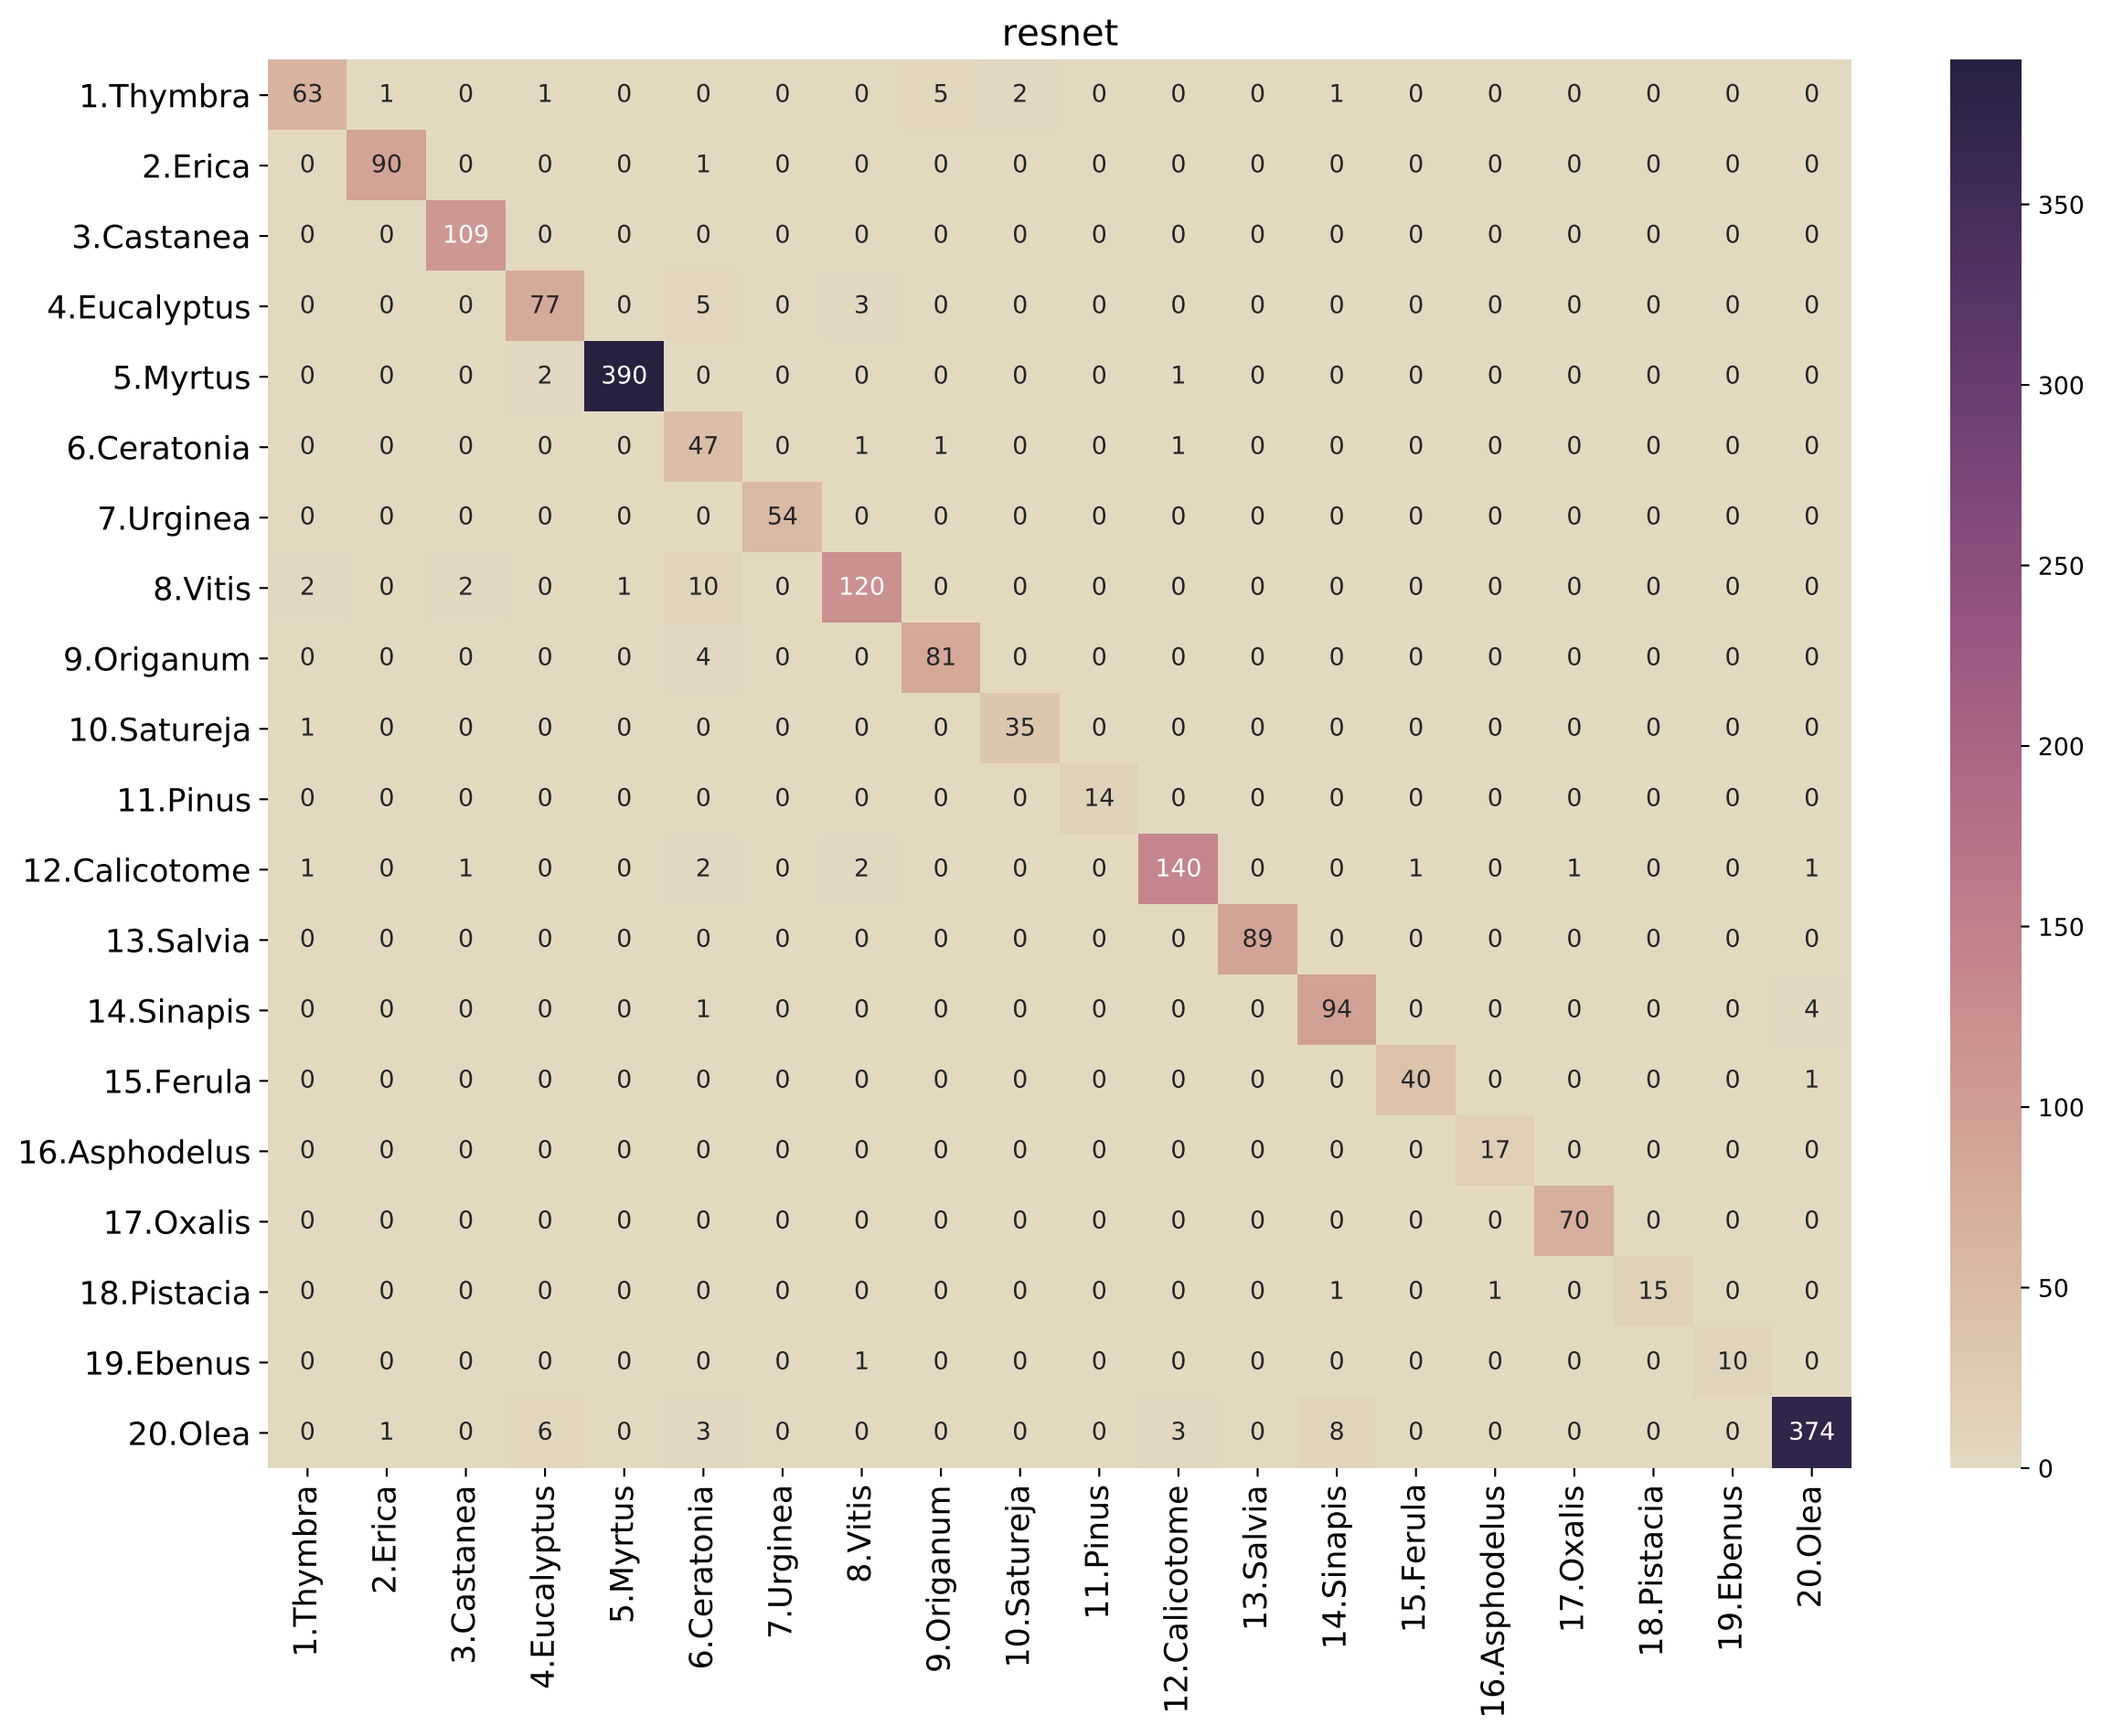

Supplement: s1 [file s1]

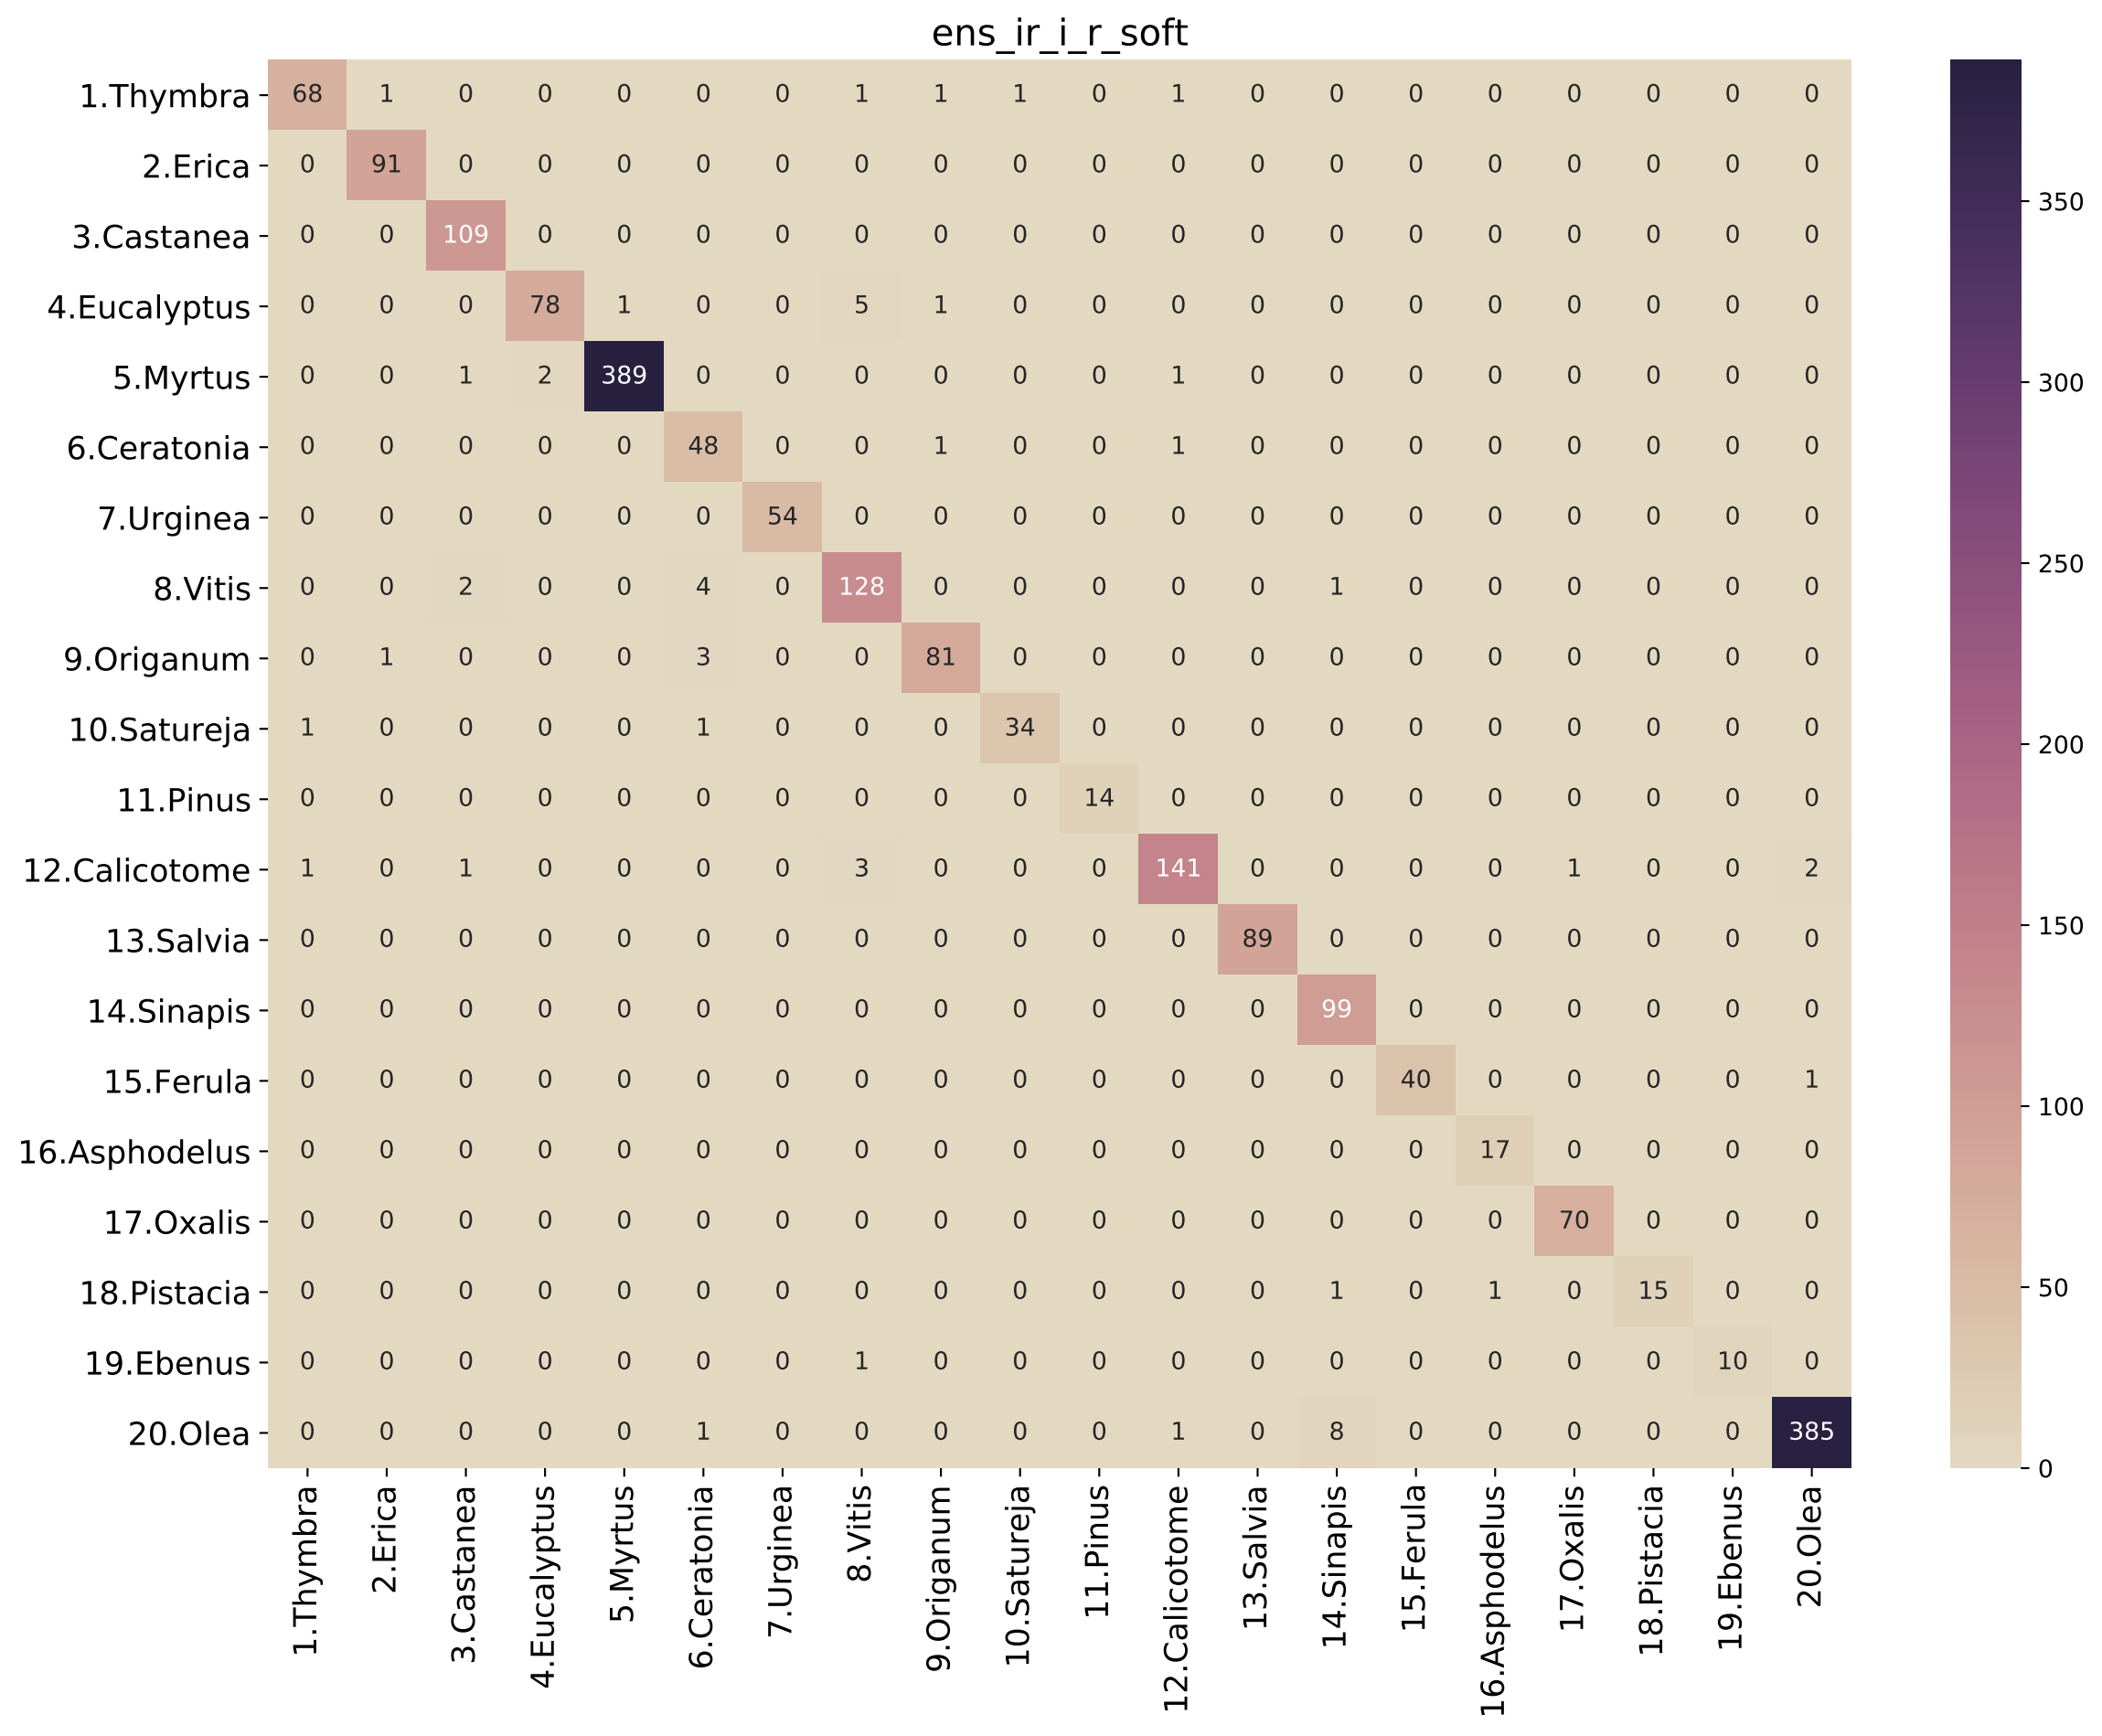

Supplement: s1 [file s1]

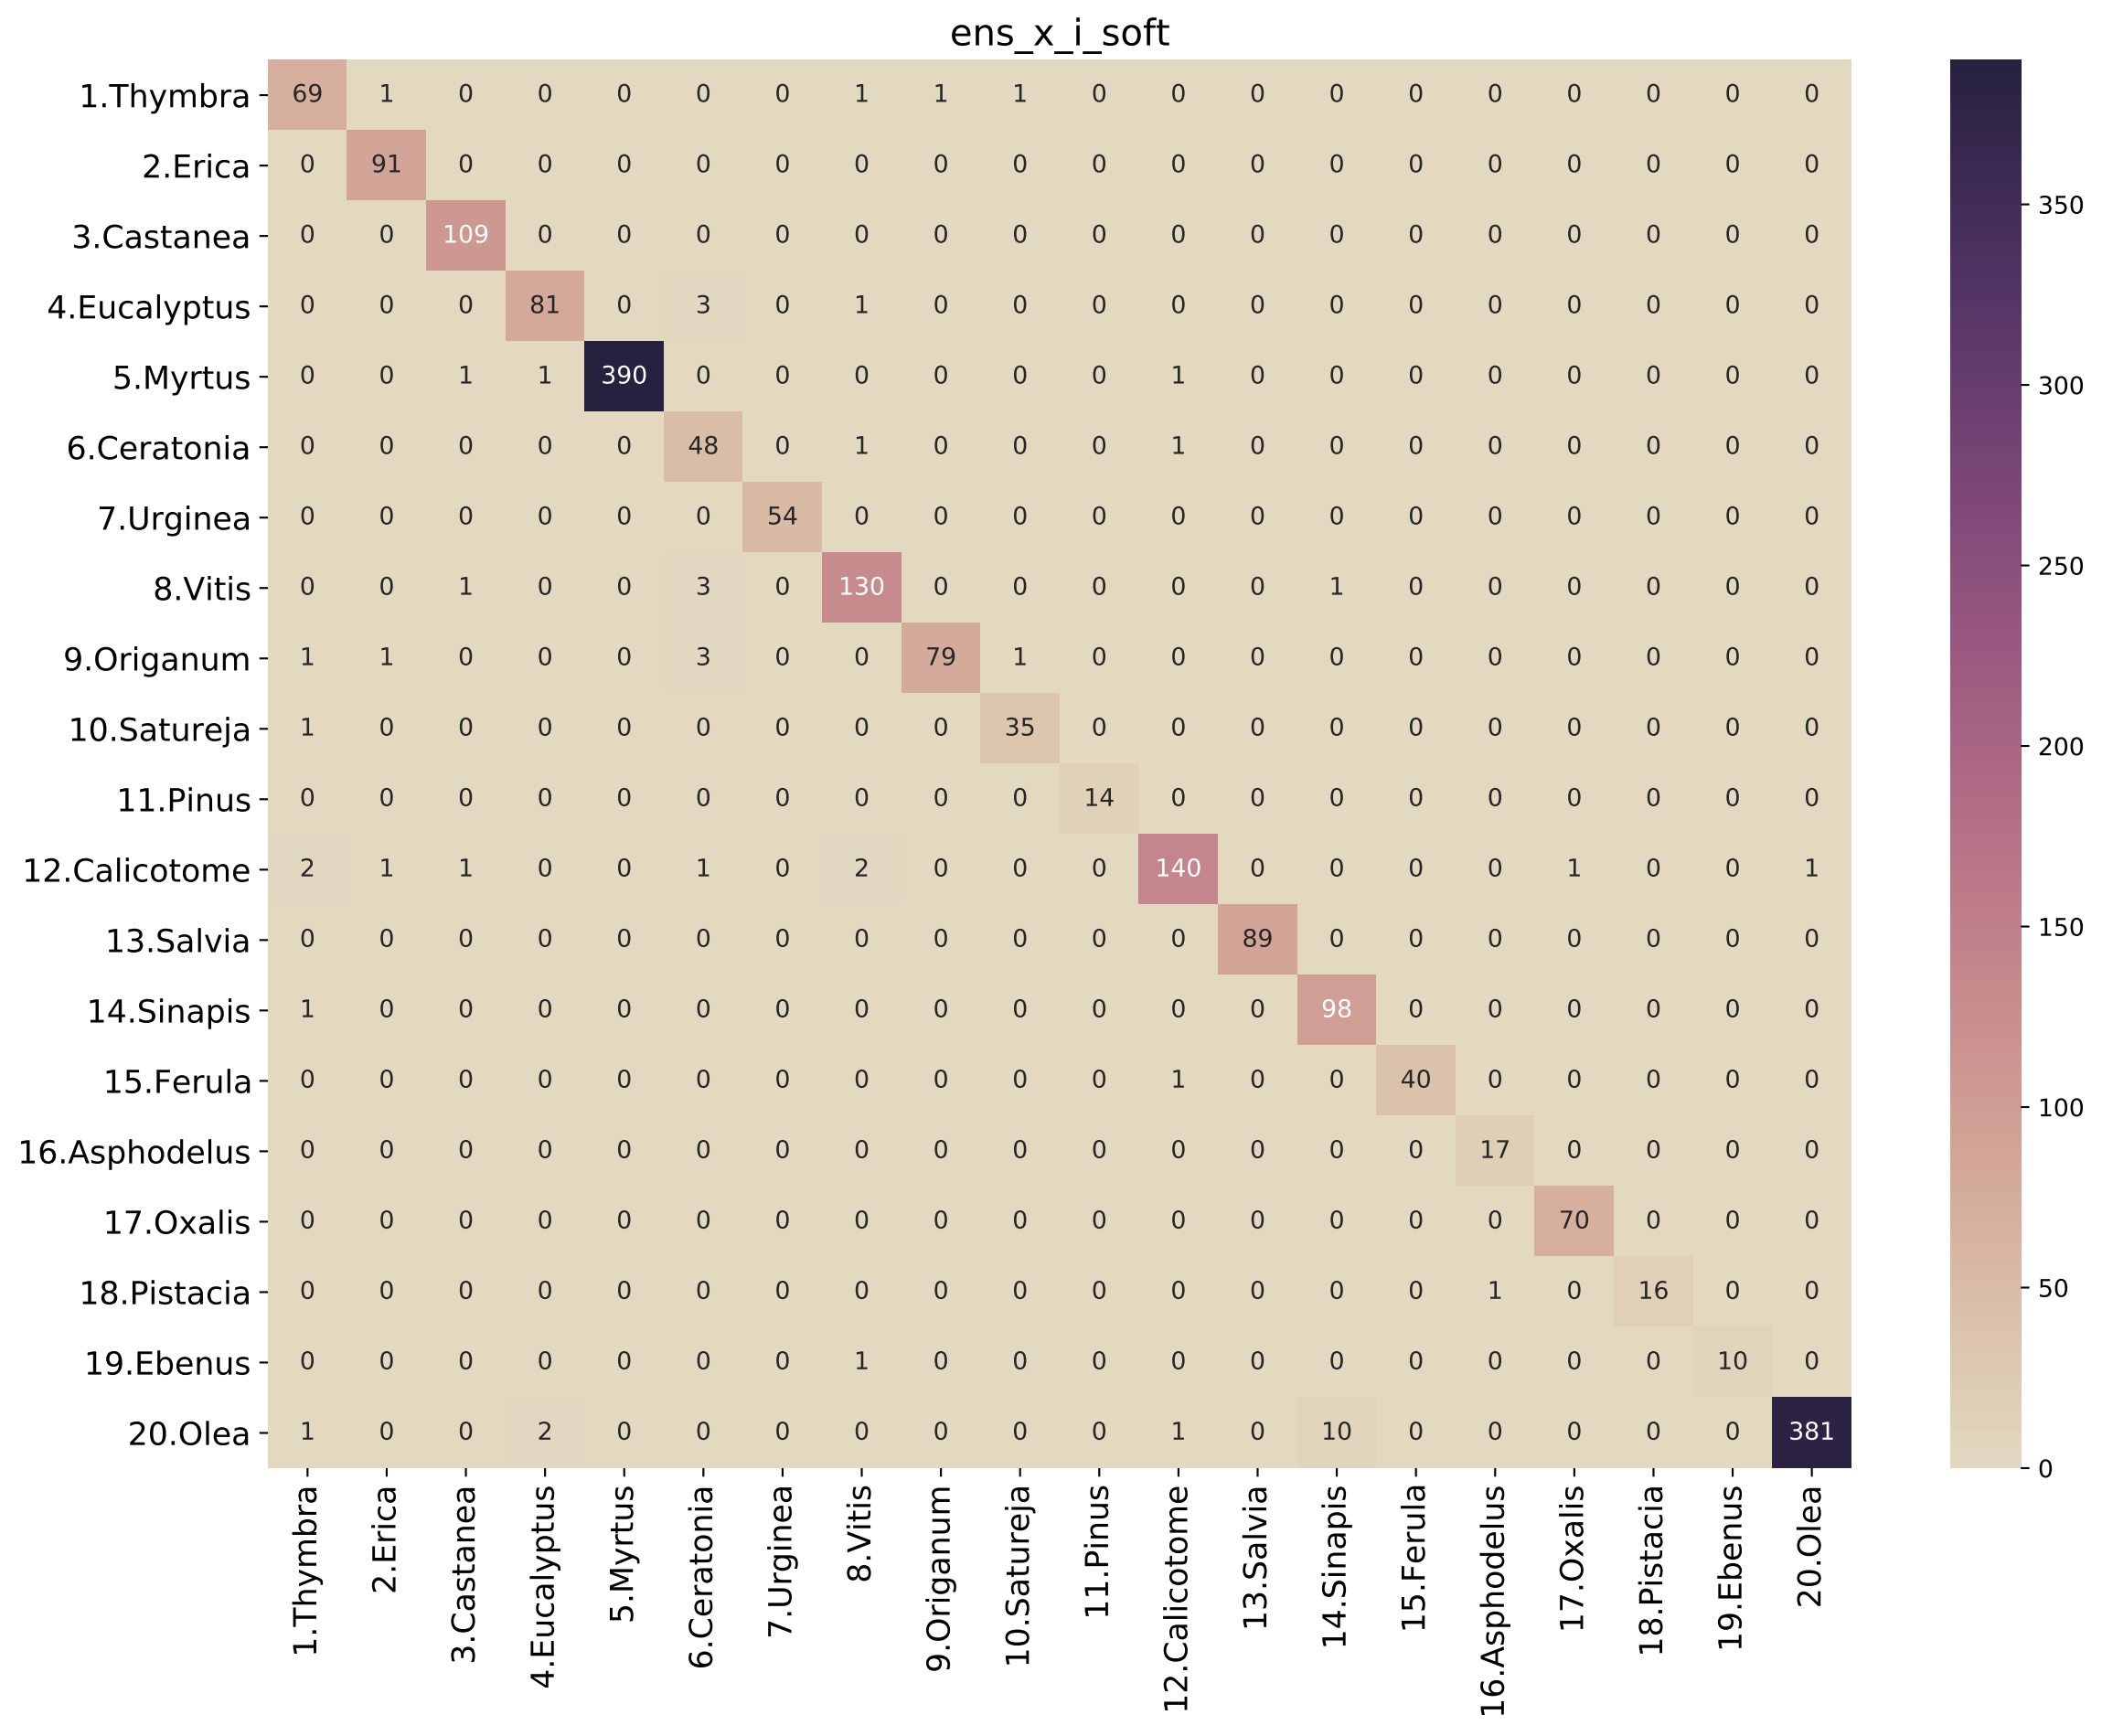

Supplement: s1 [file s1]

ens\_x\_i\_r\_soft

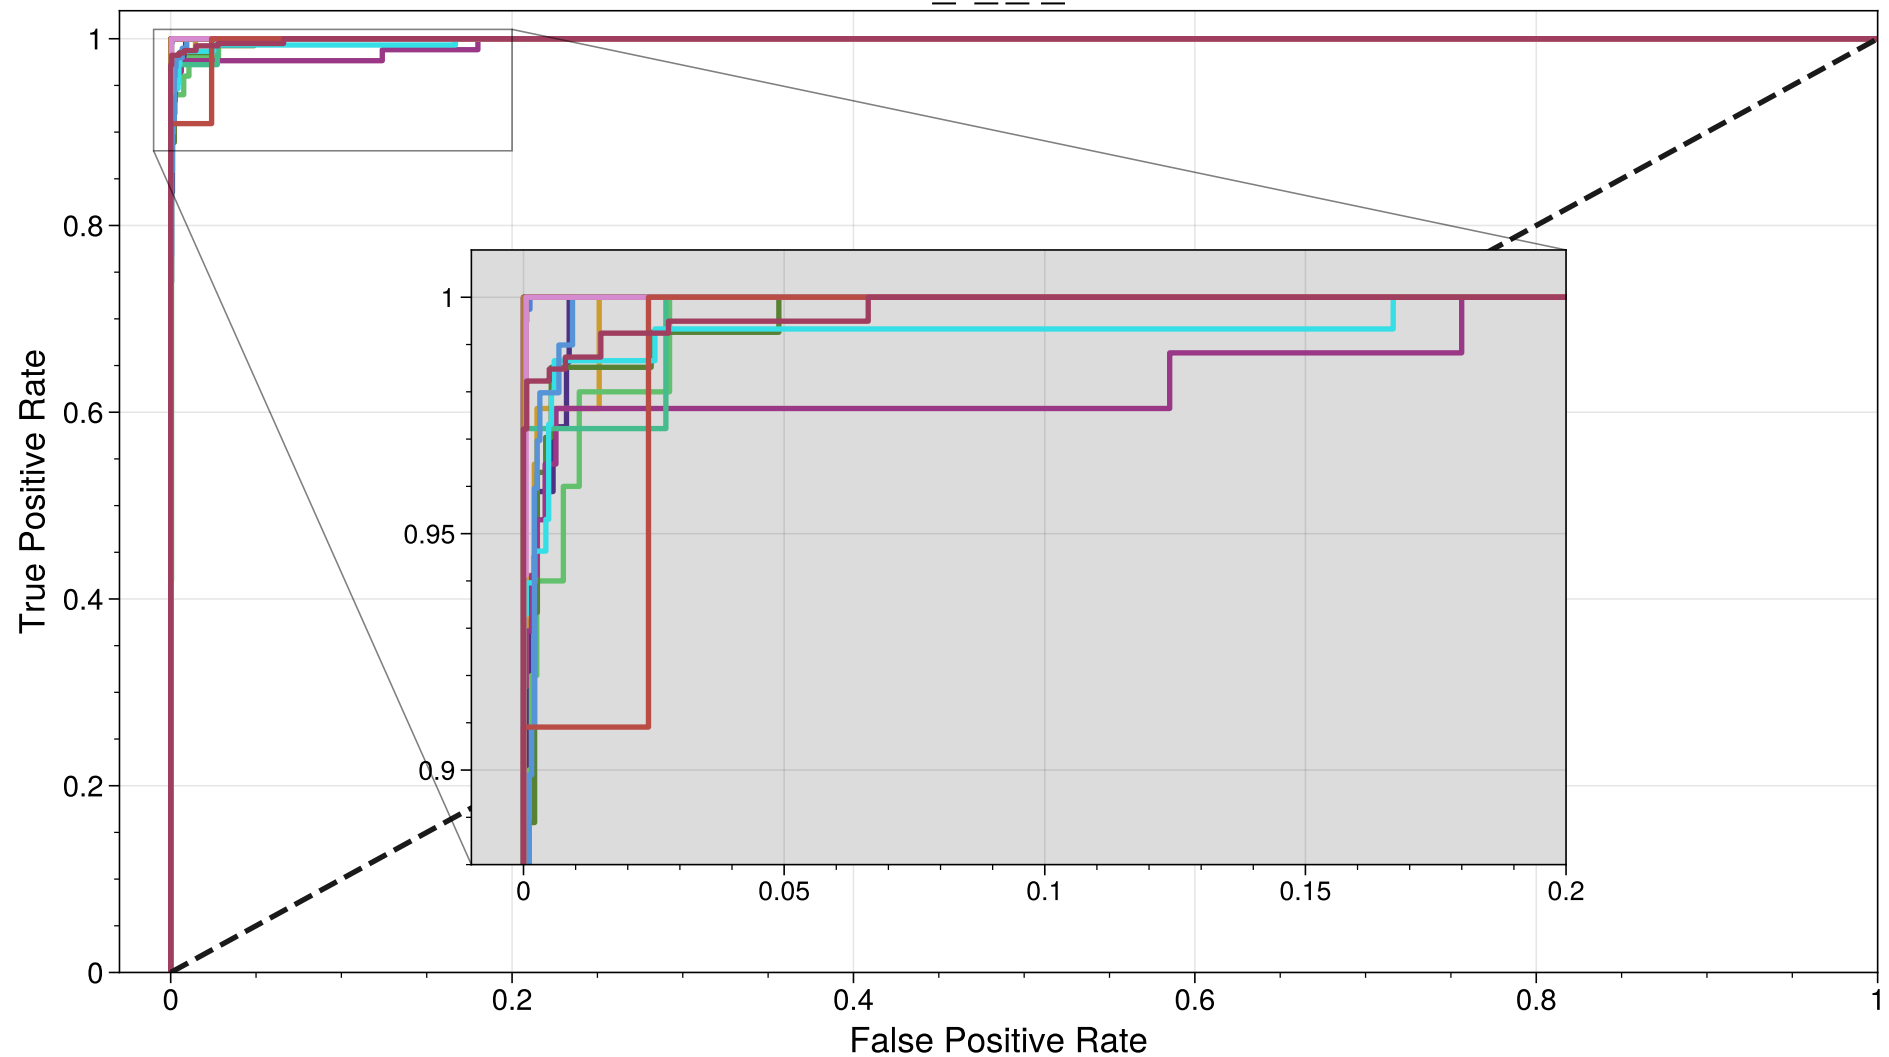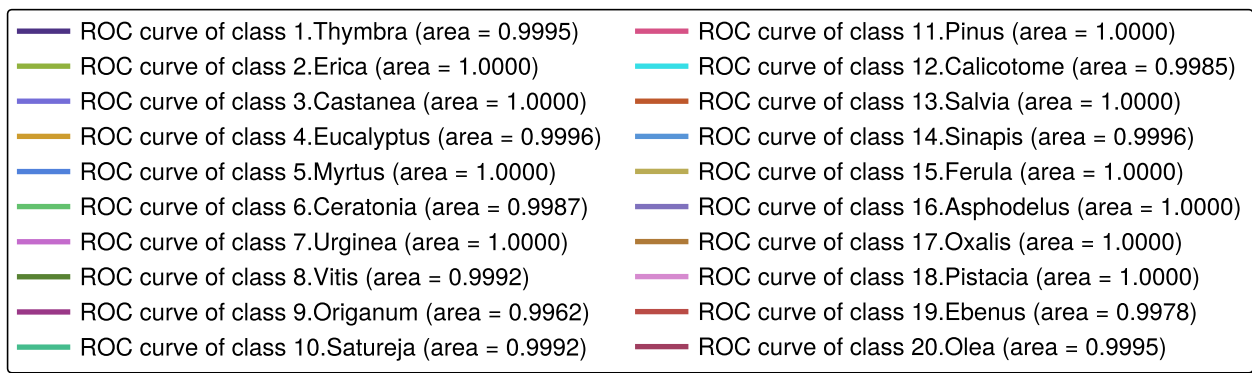

Supplement: s1 [file s1]

ens\_x\_i\_soft

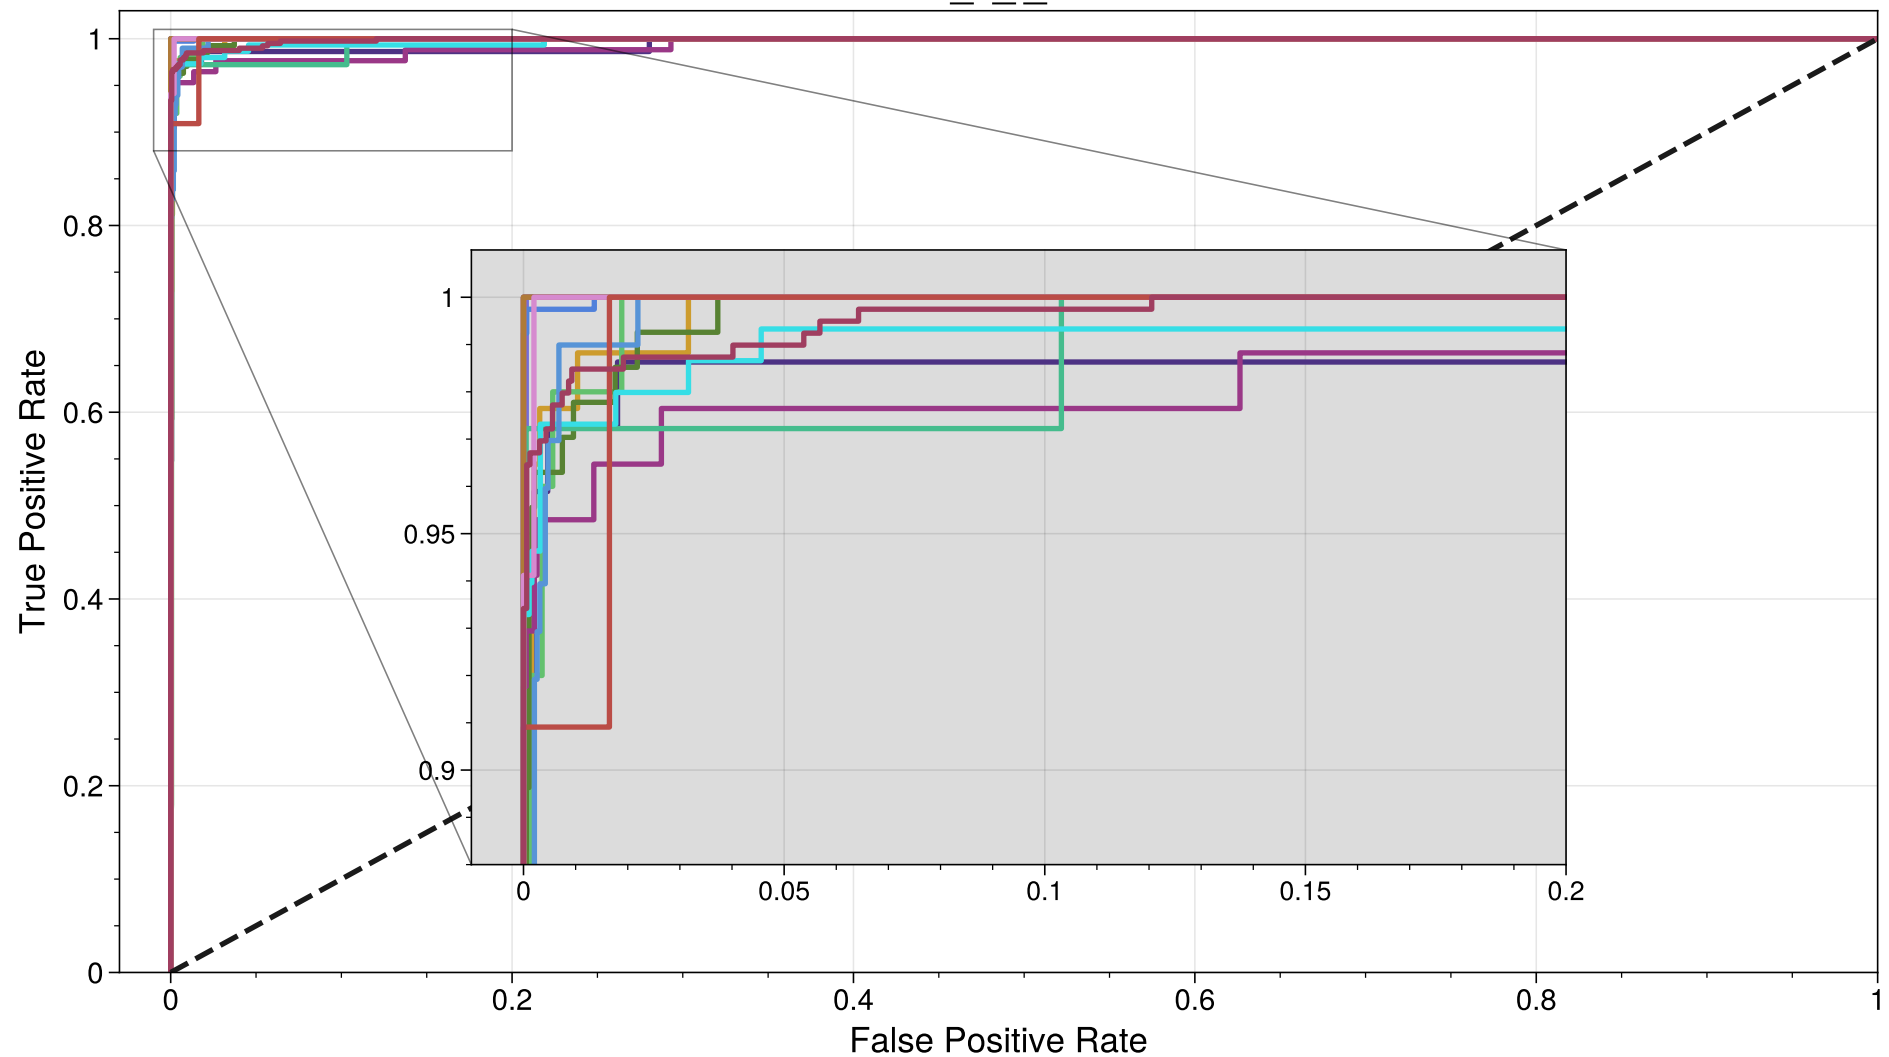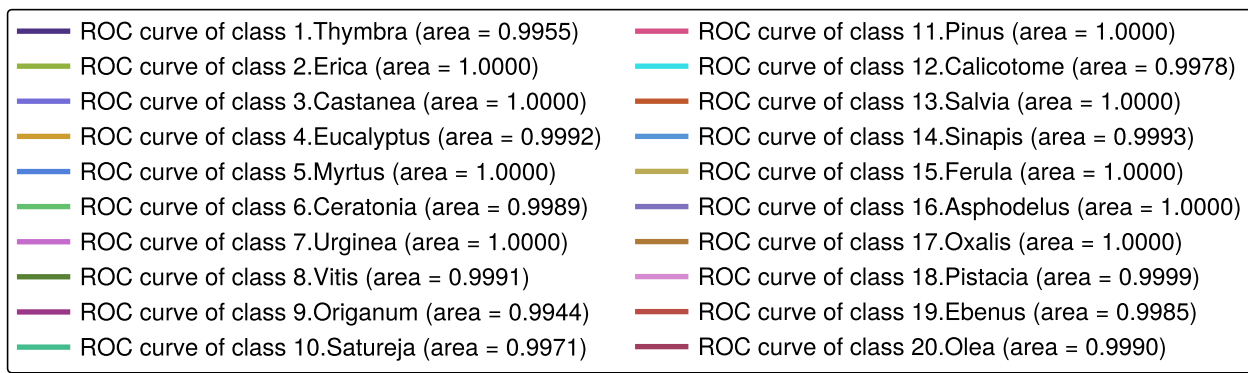

Supplement: s1 [file s1]

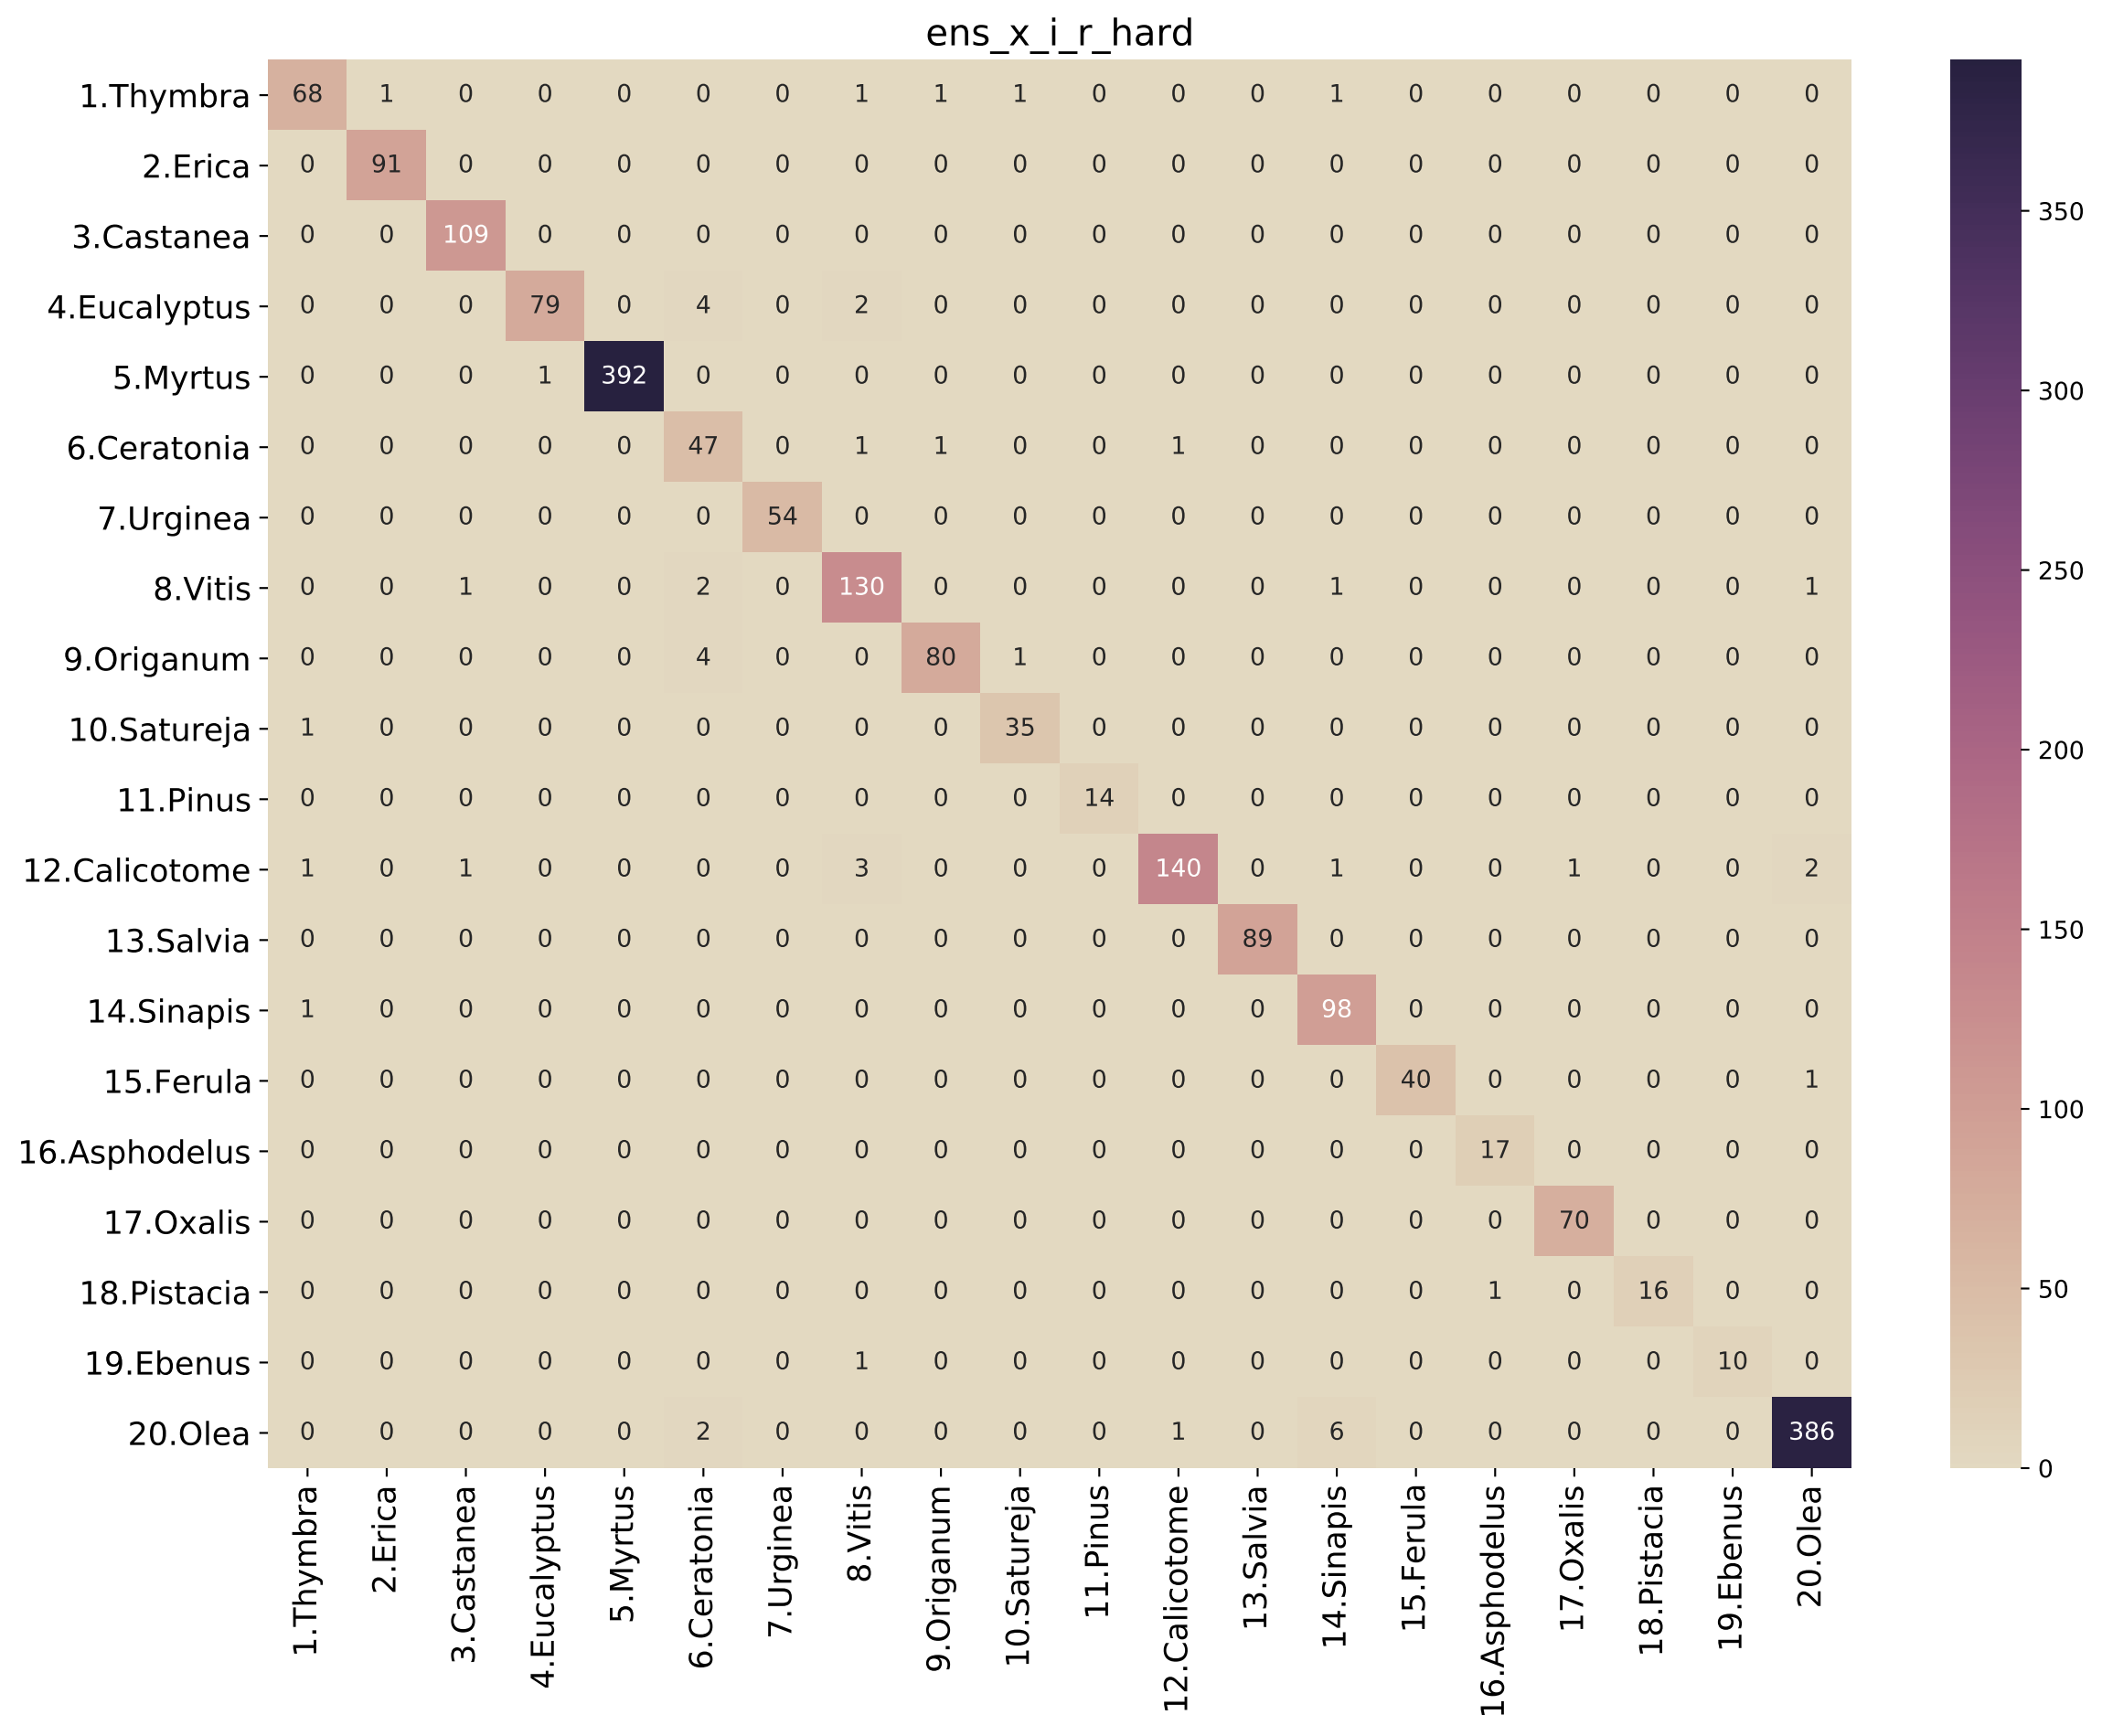

Supplement: s1 [file s1]

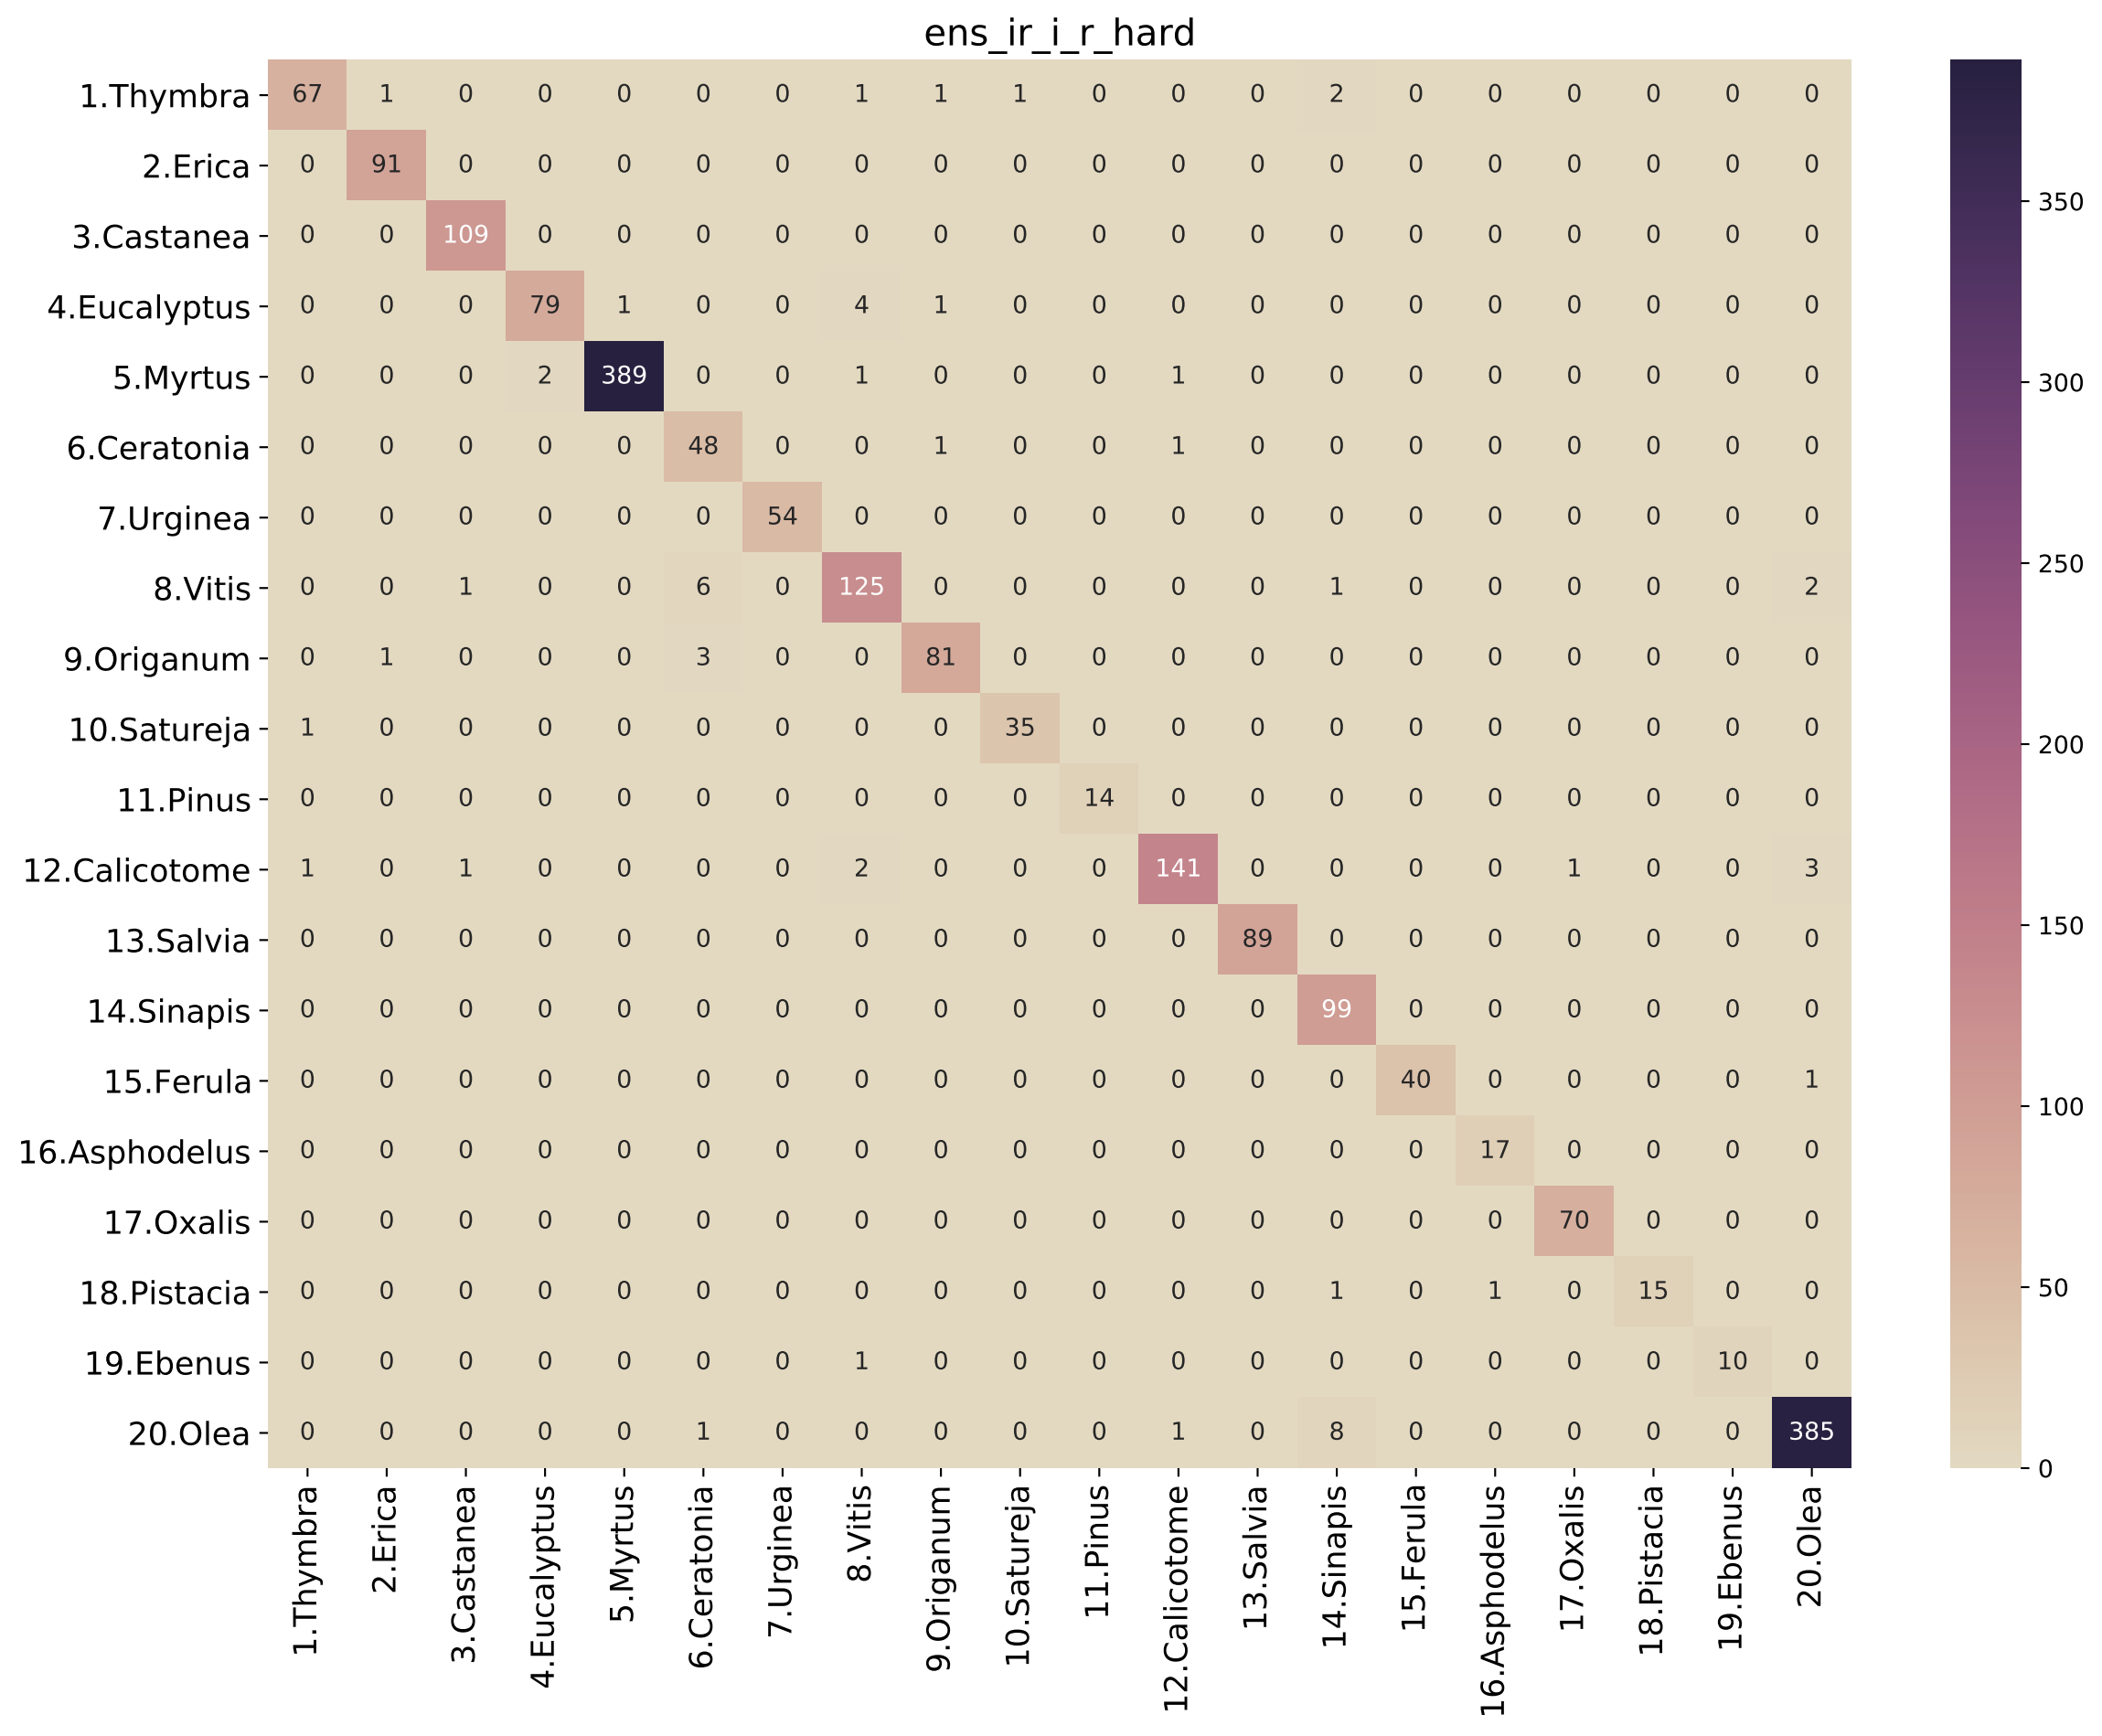

Supplement: s1 [file s1]

ens\_x\_ir\_i\_soft

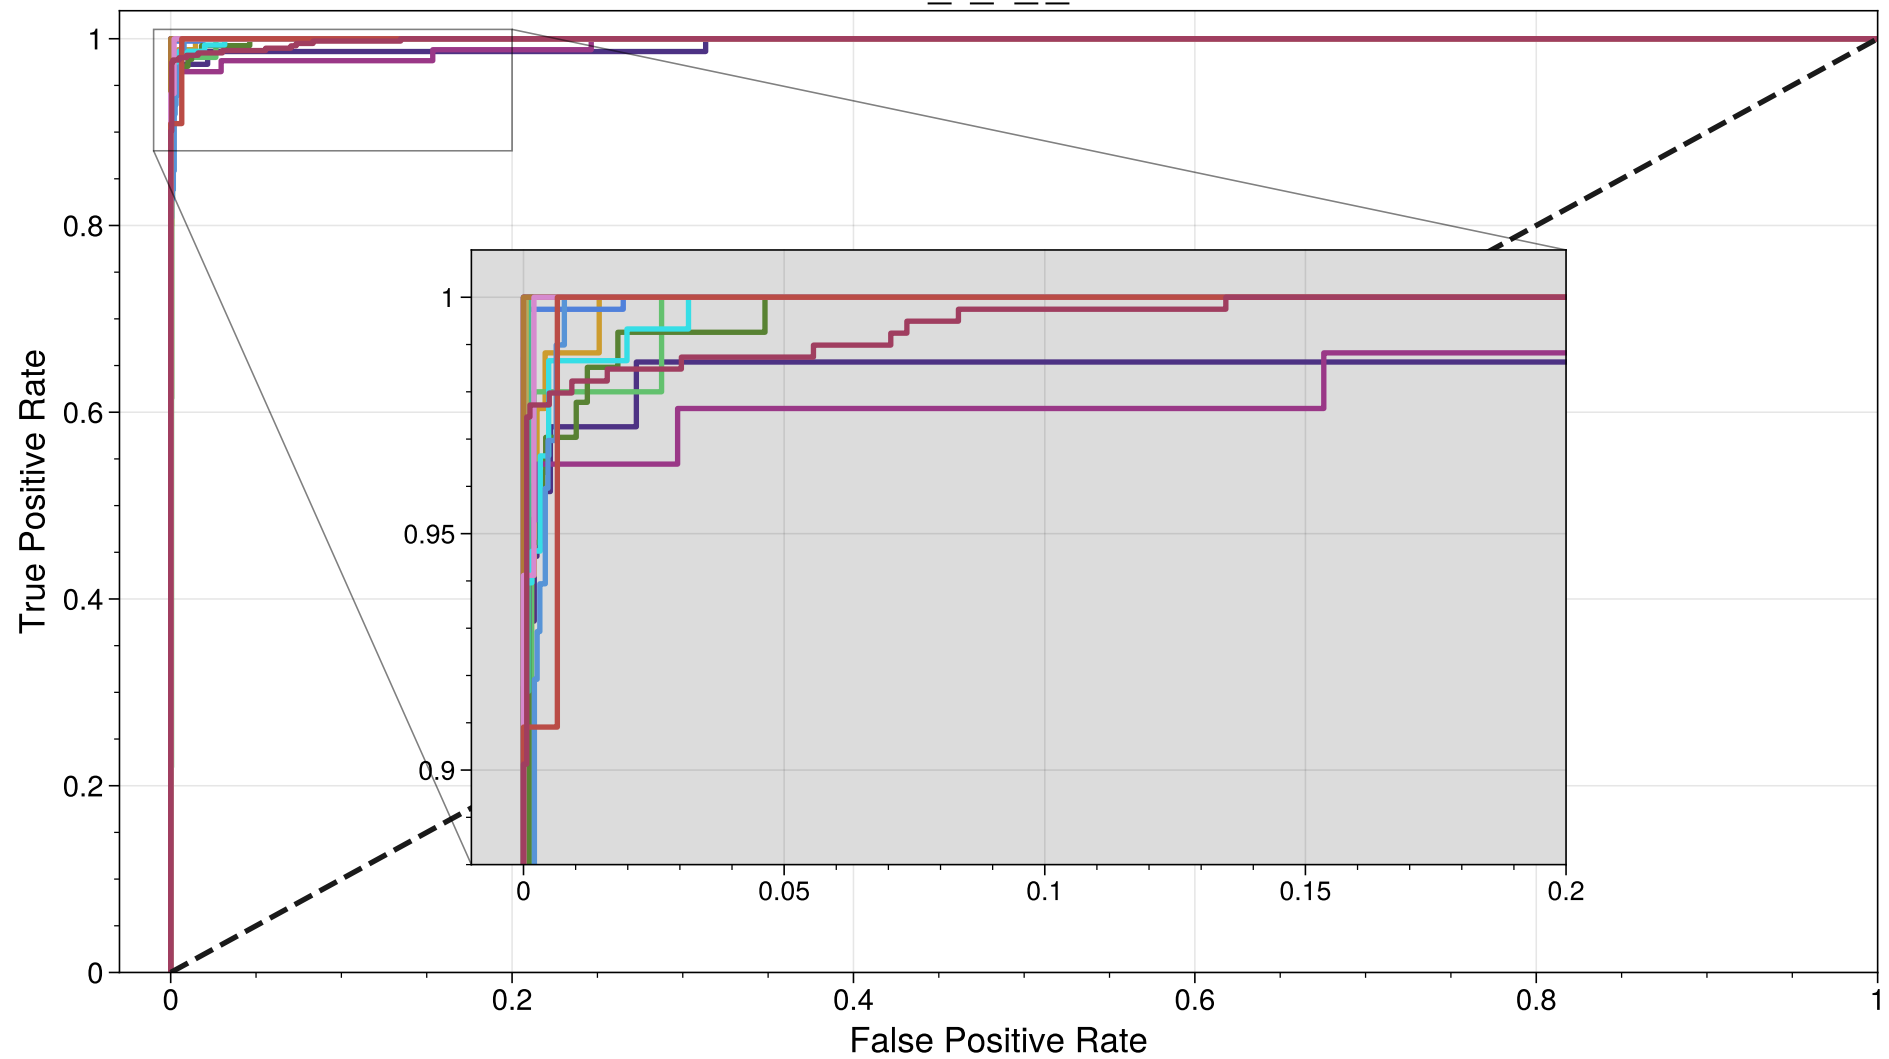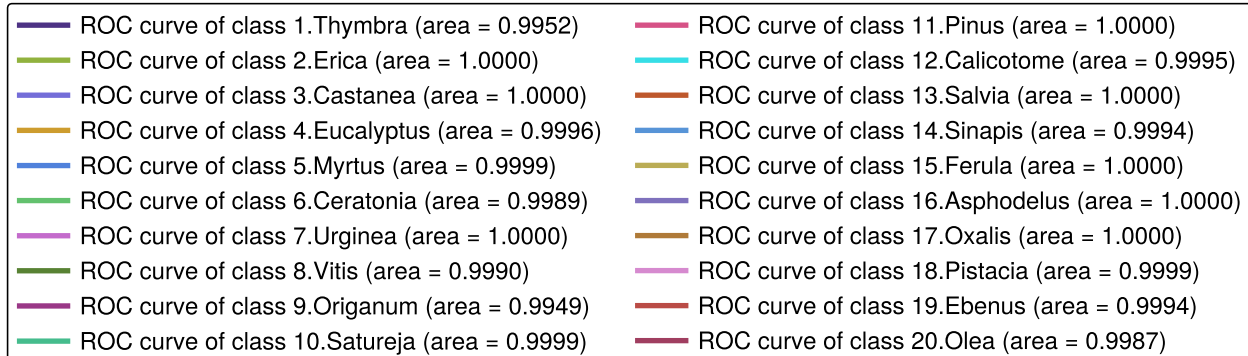

Supplement: s1 [file s1]

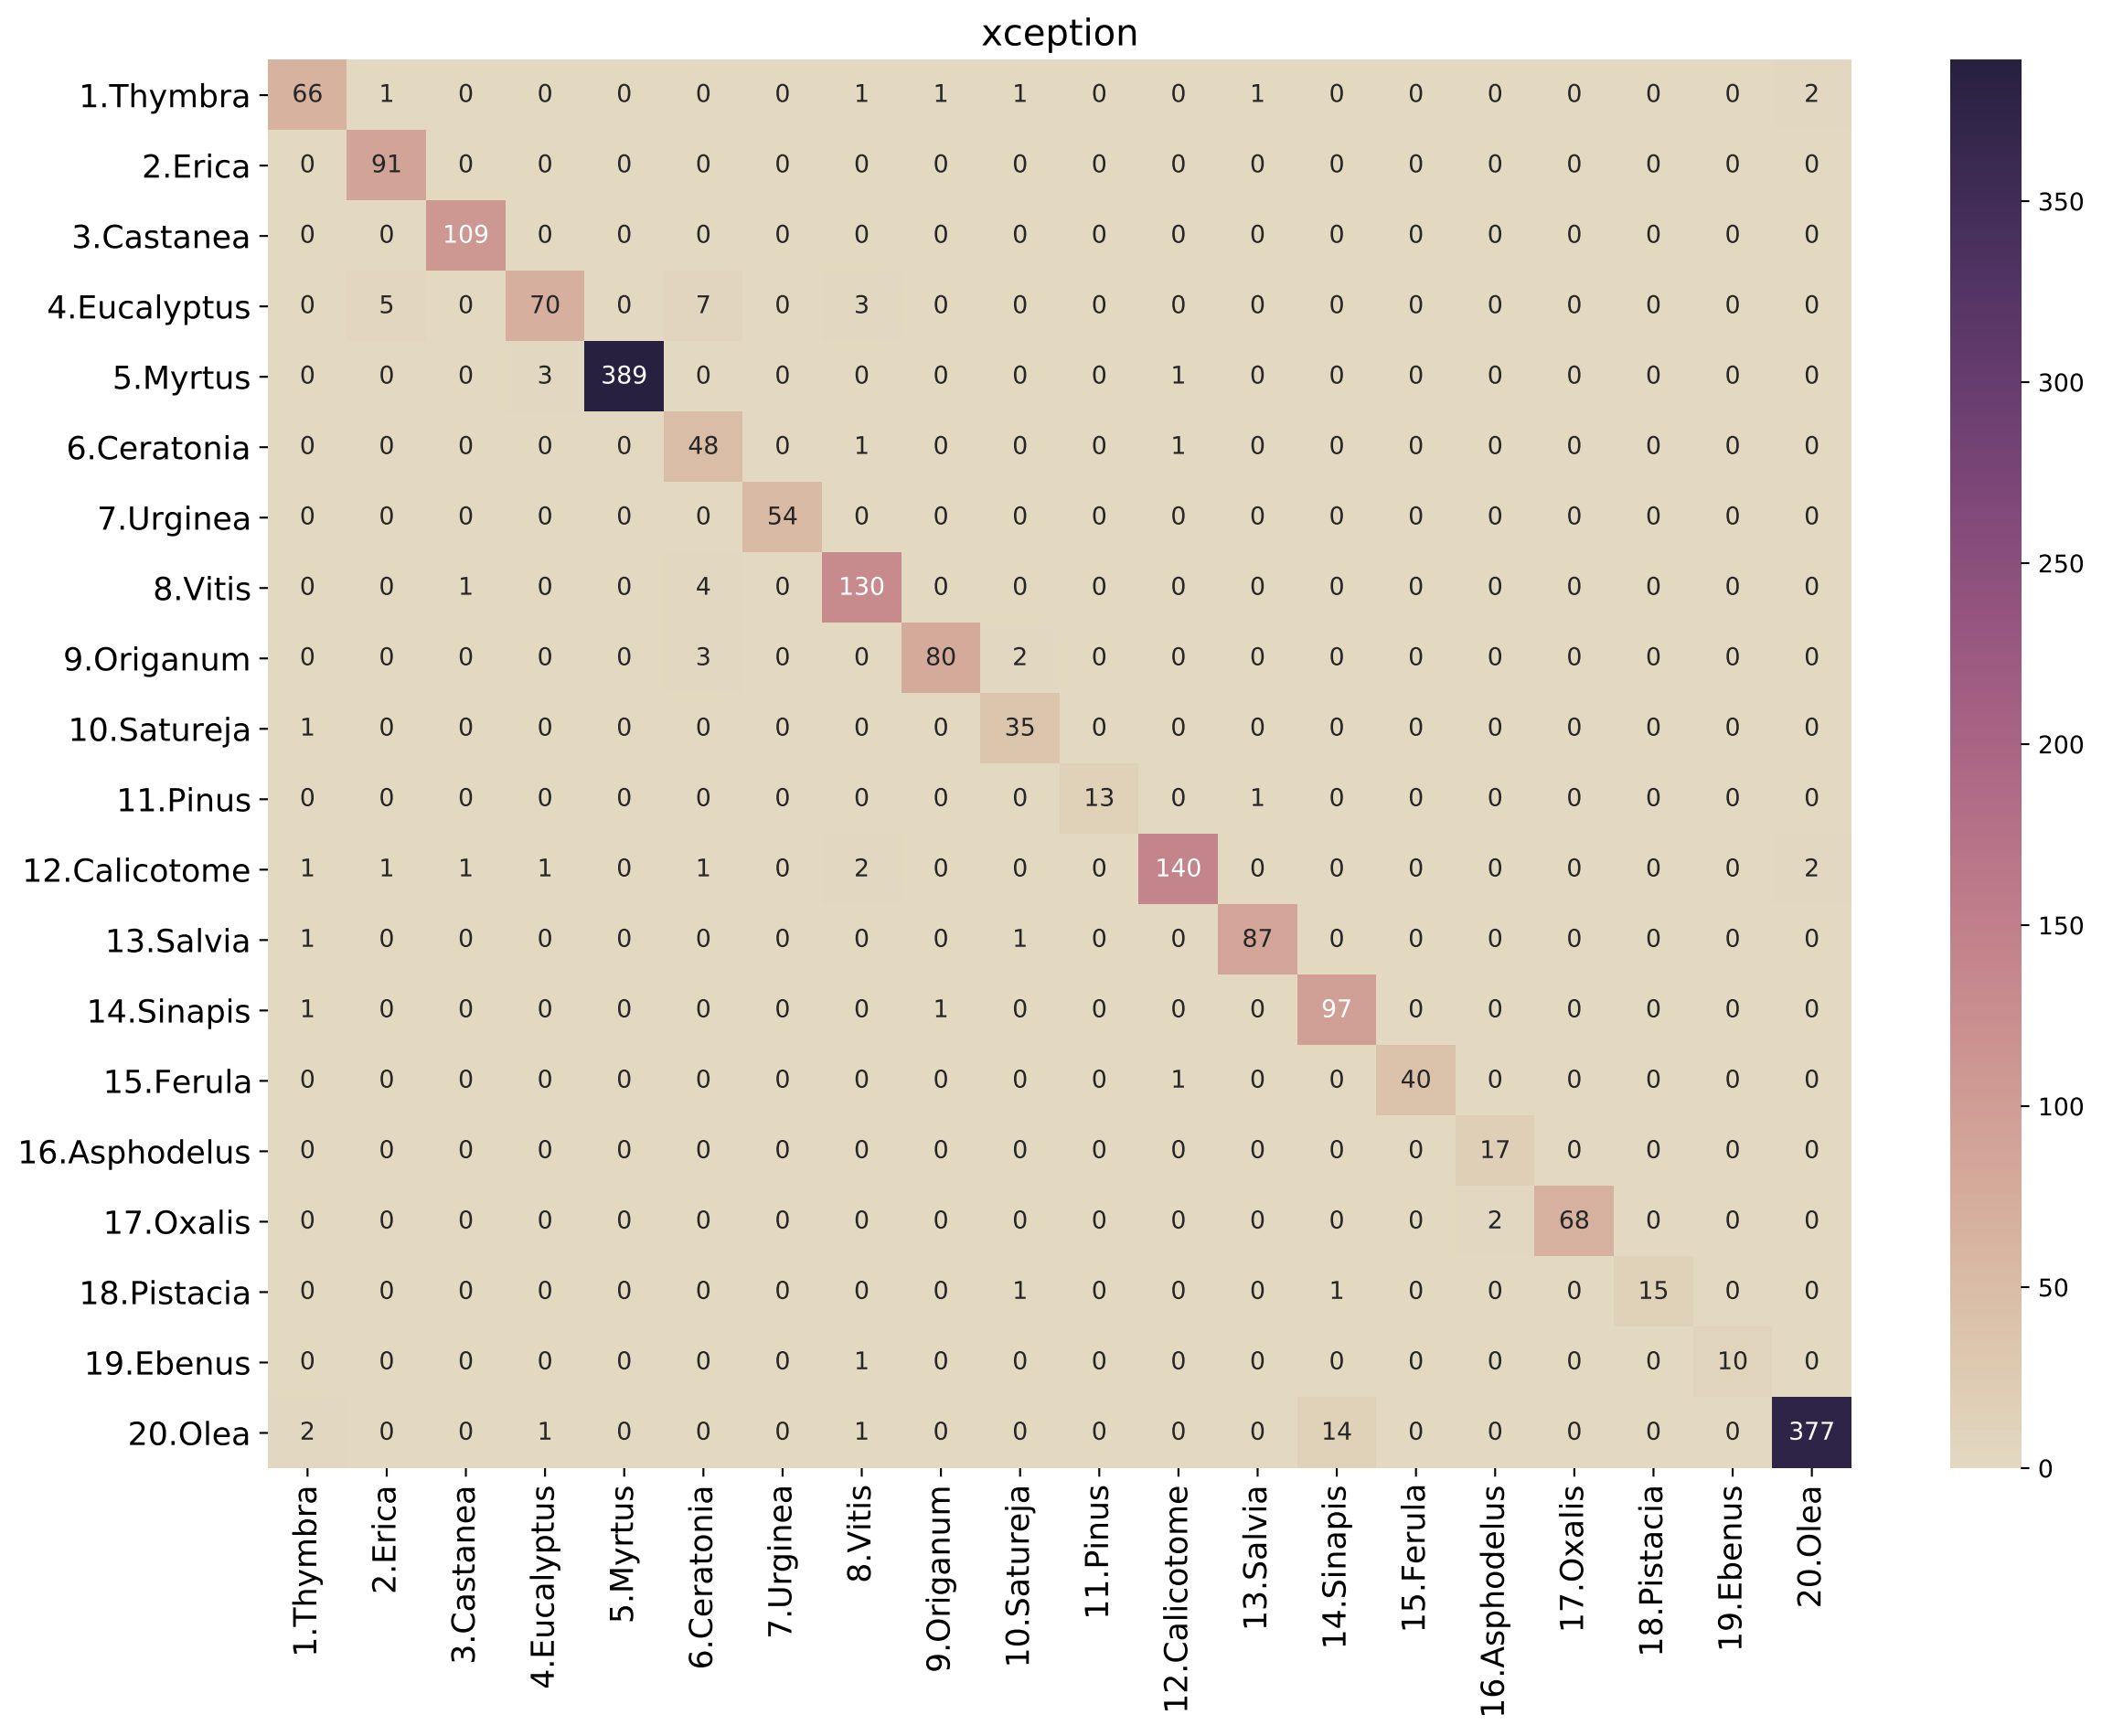

Supplement: s1 [file s1]

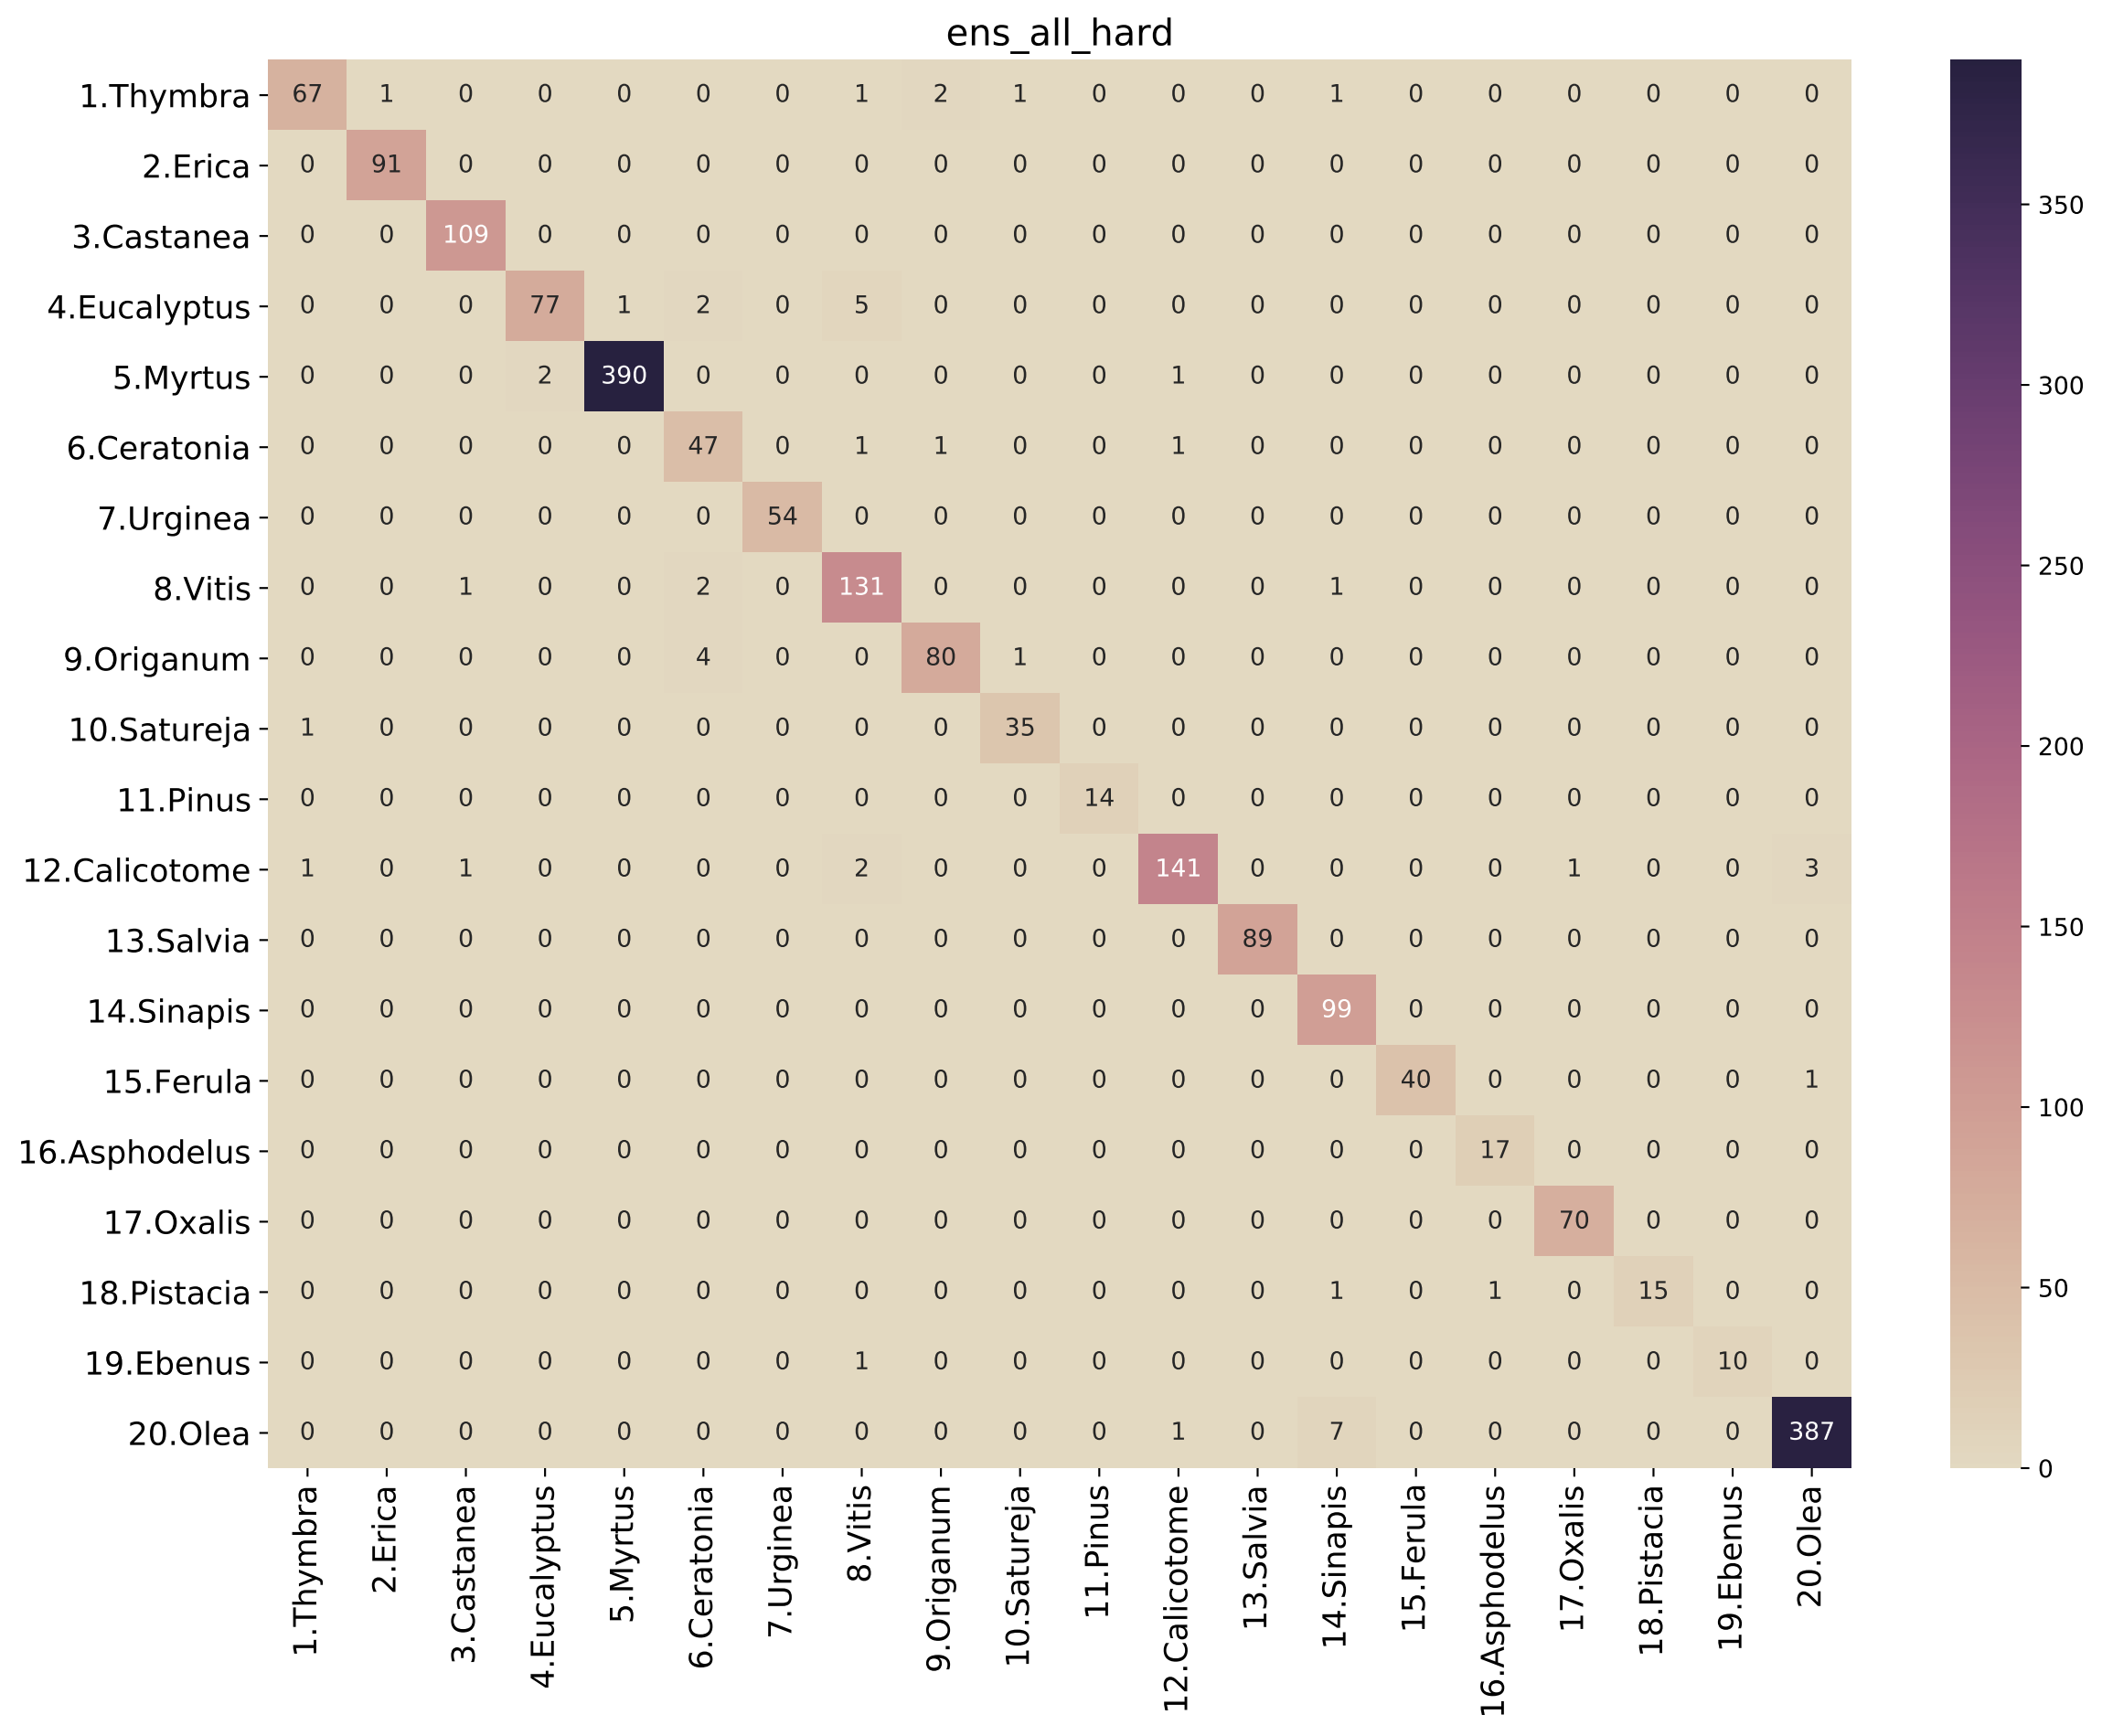

Supplement: s1 [file s1]

ens\_x\_r\_soft

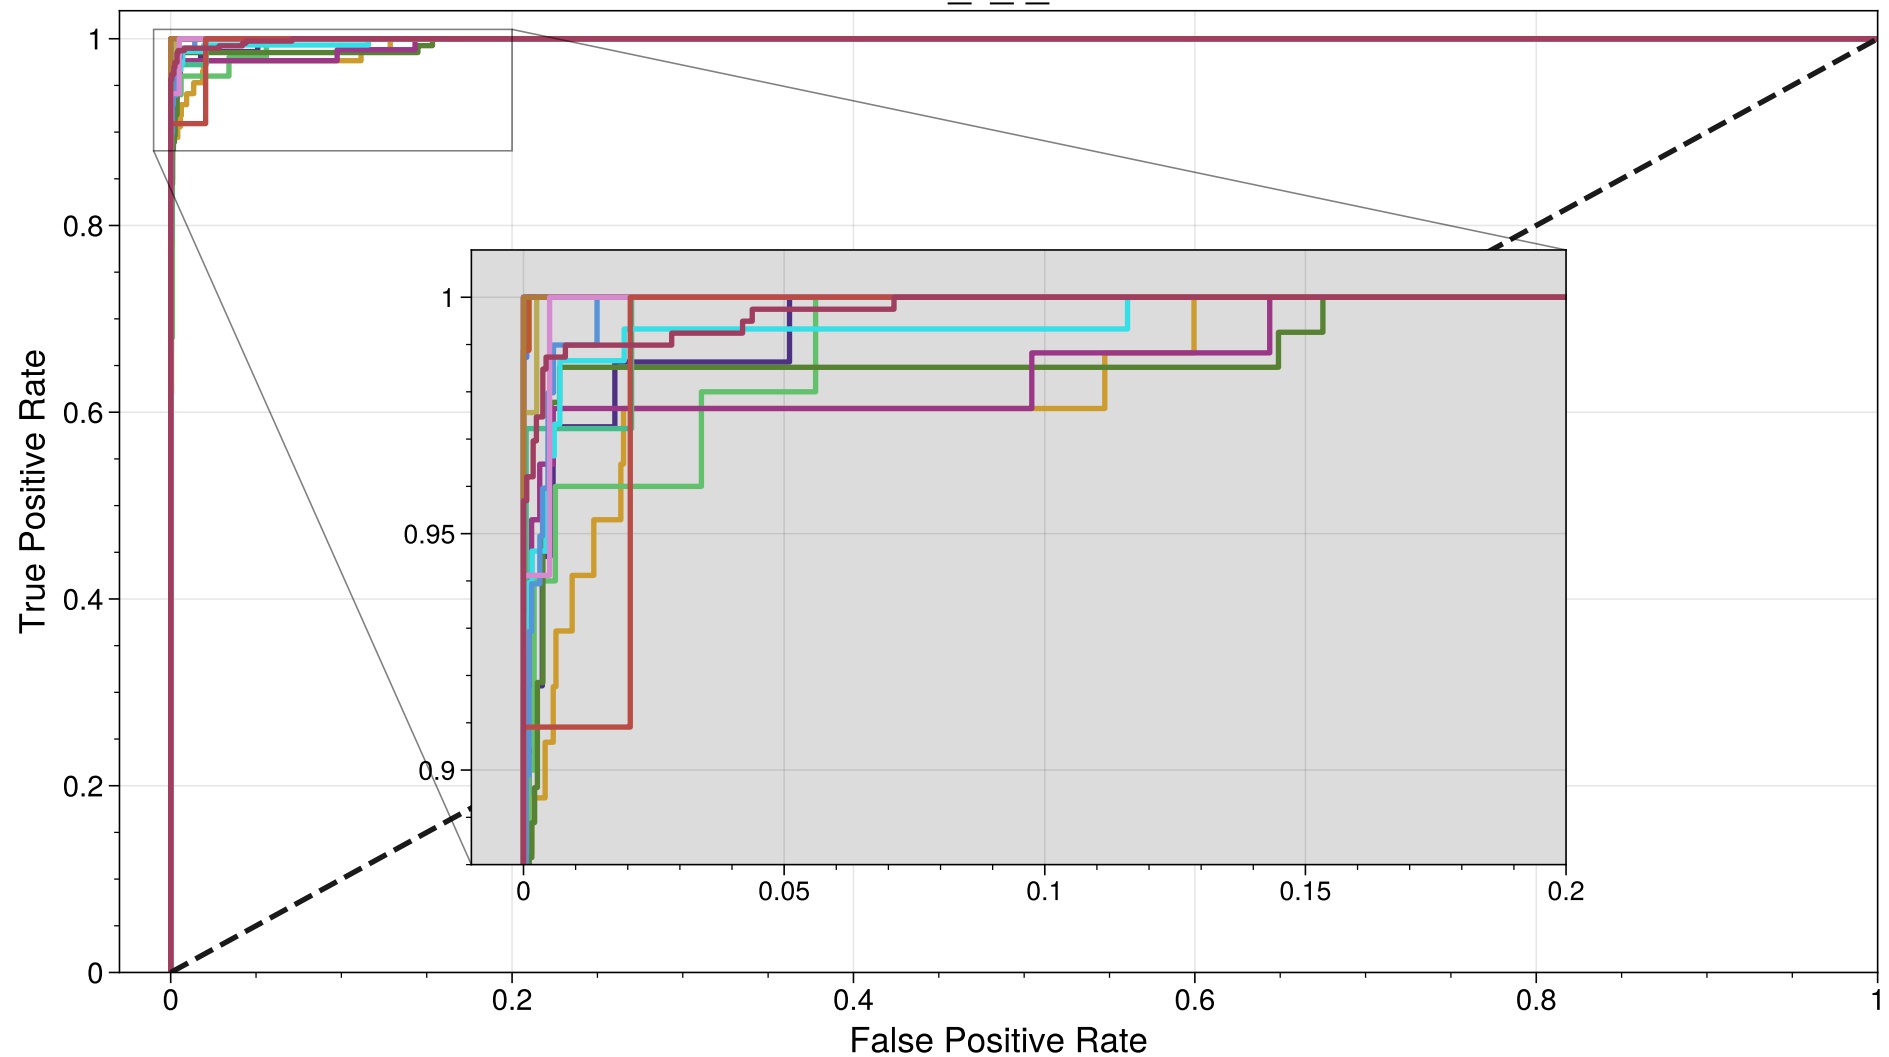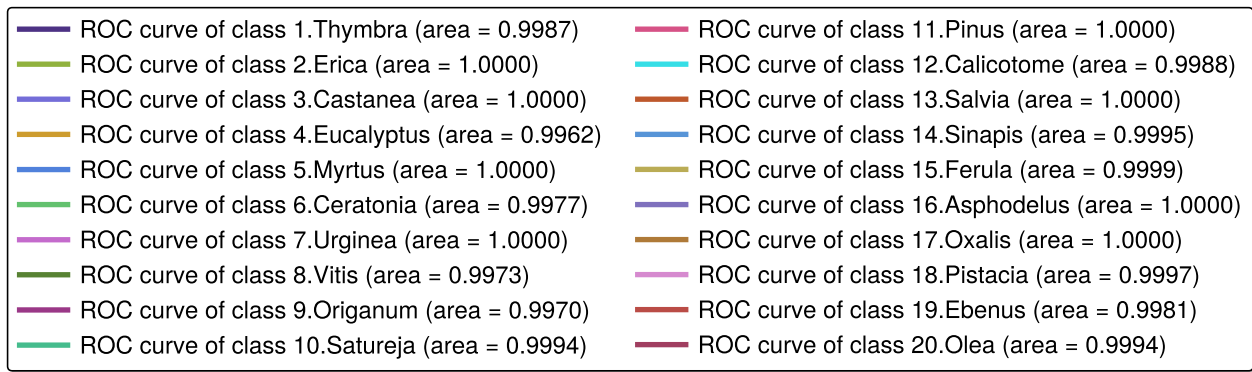

Supplement: s1 [file s1]

ens\_all\_soft

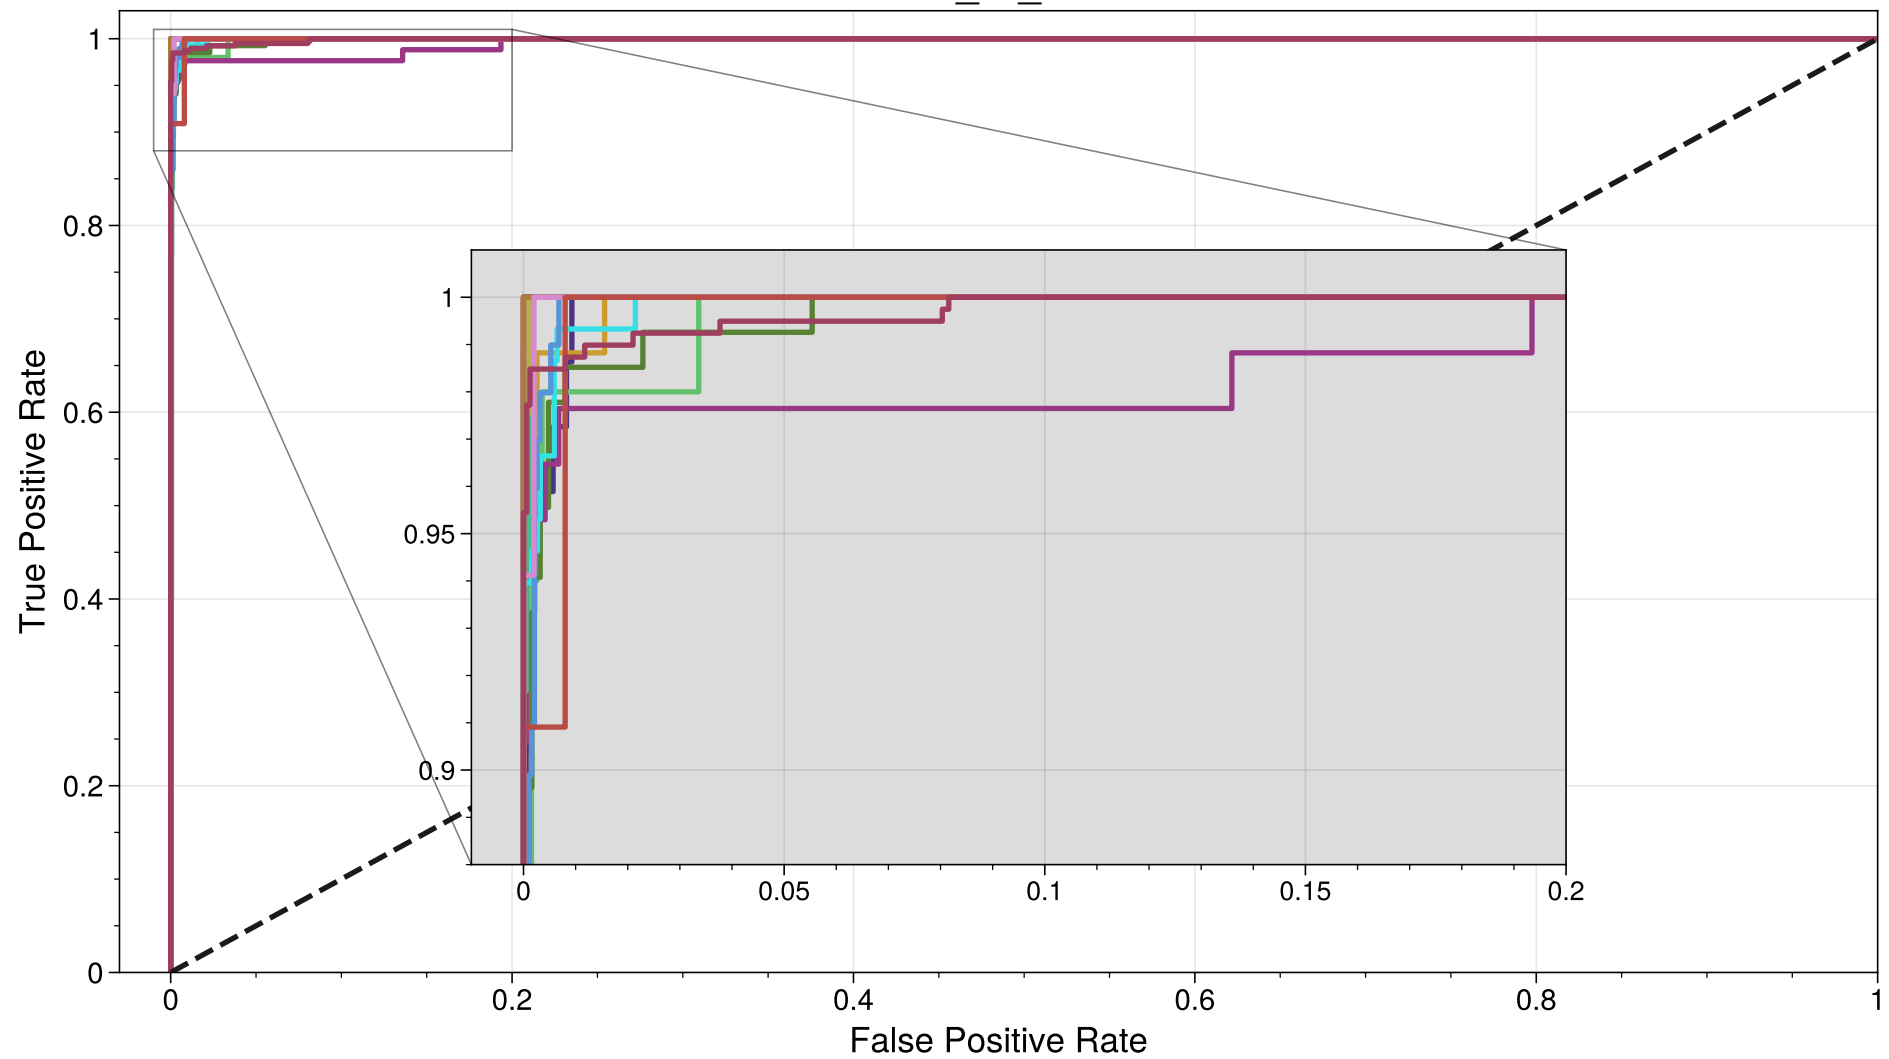

Supplement: s1 [file s1]

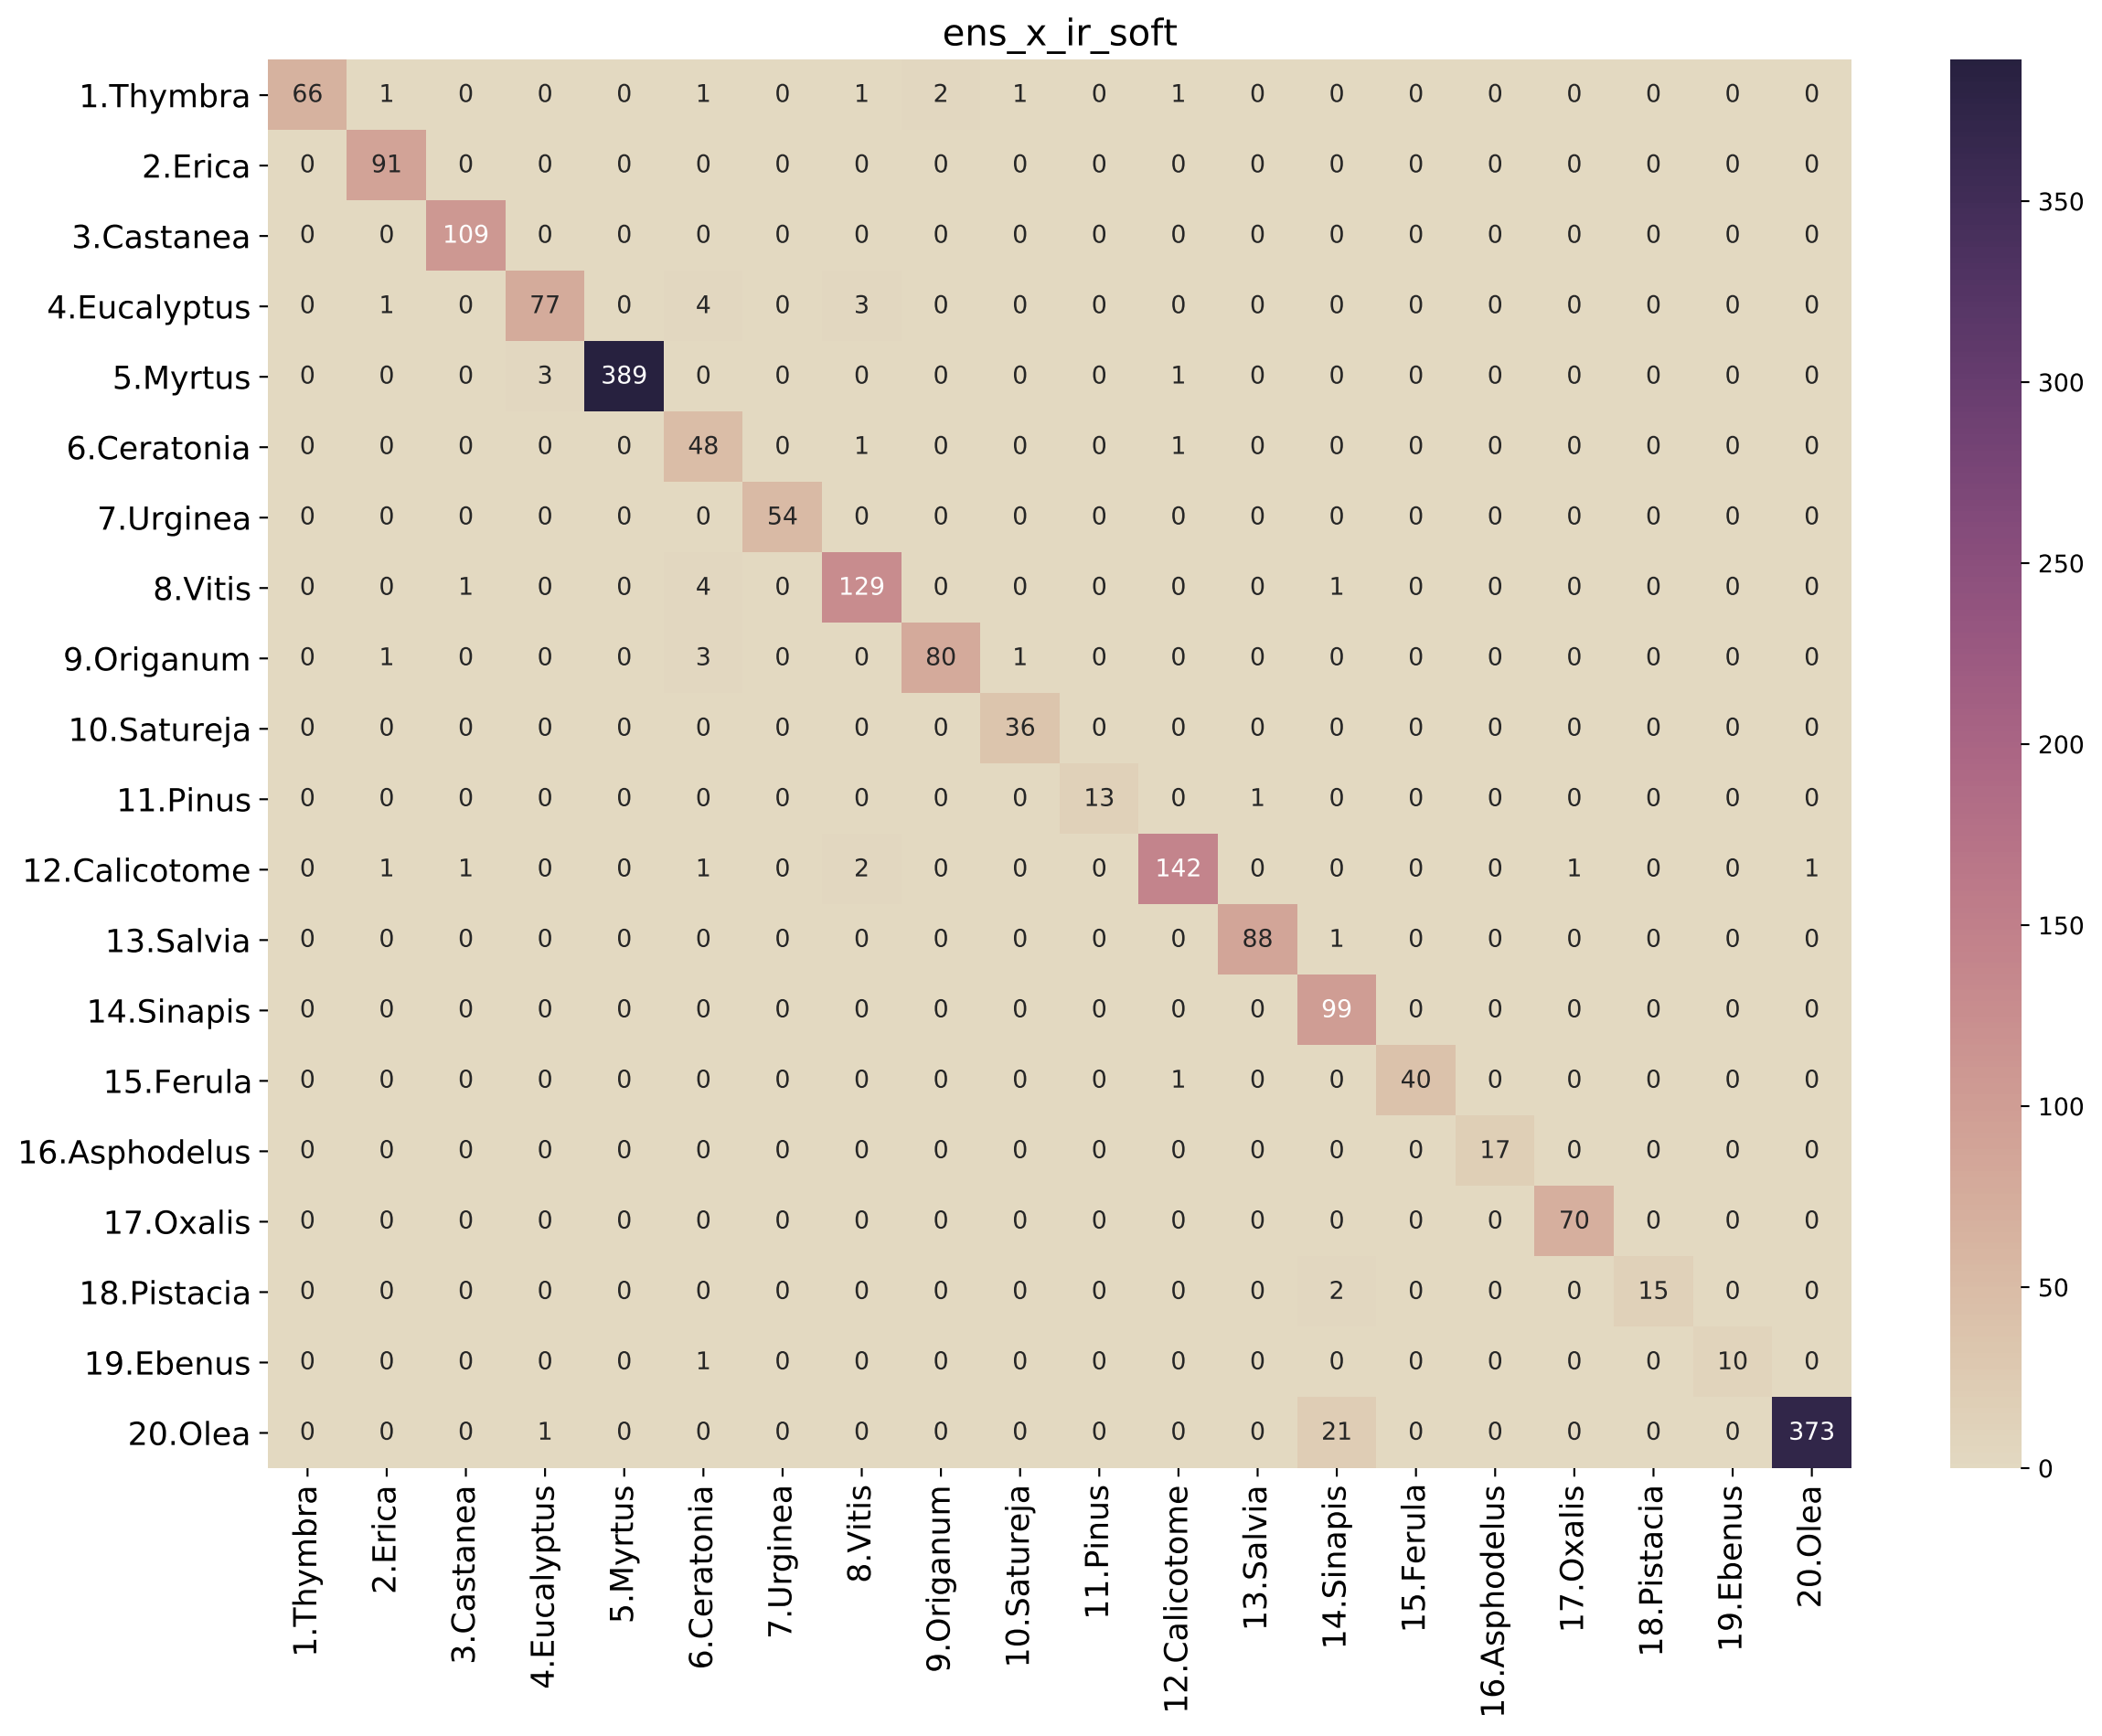

Supplement: s1 [file s1]

ens\_all\_soft

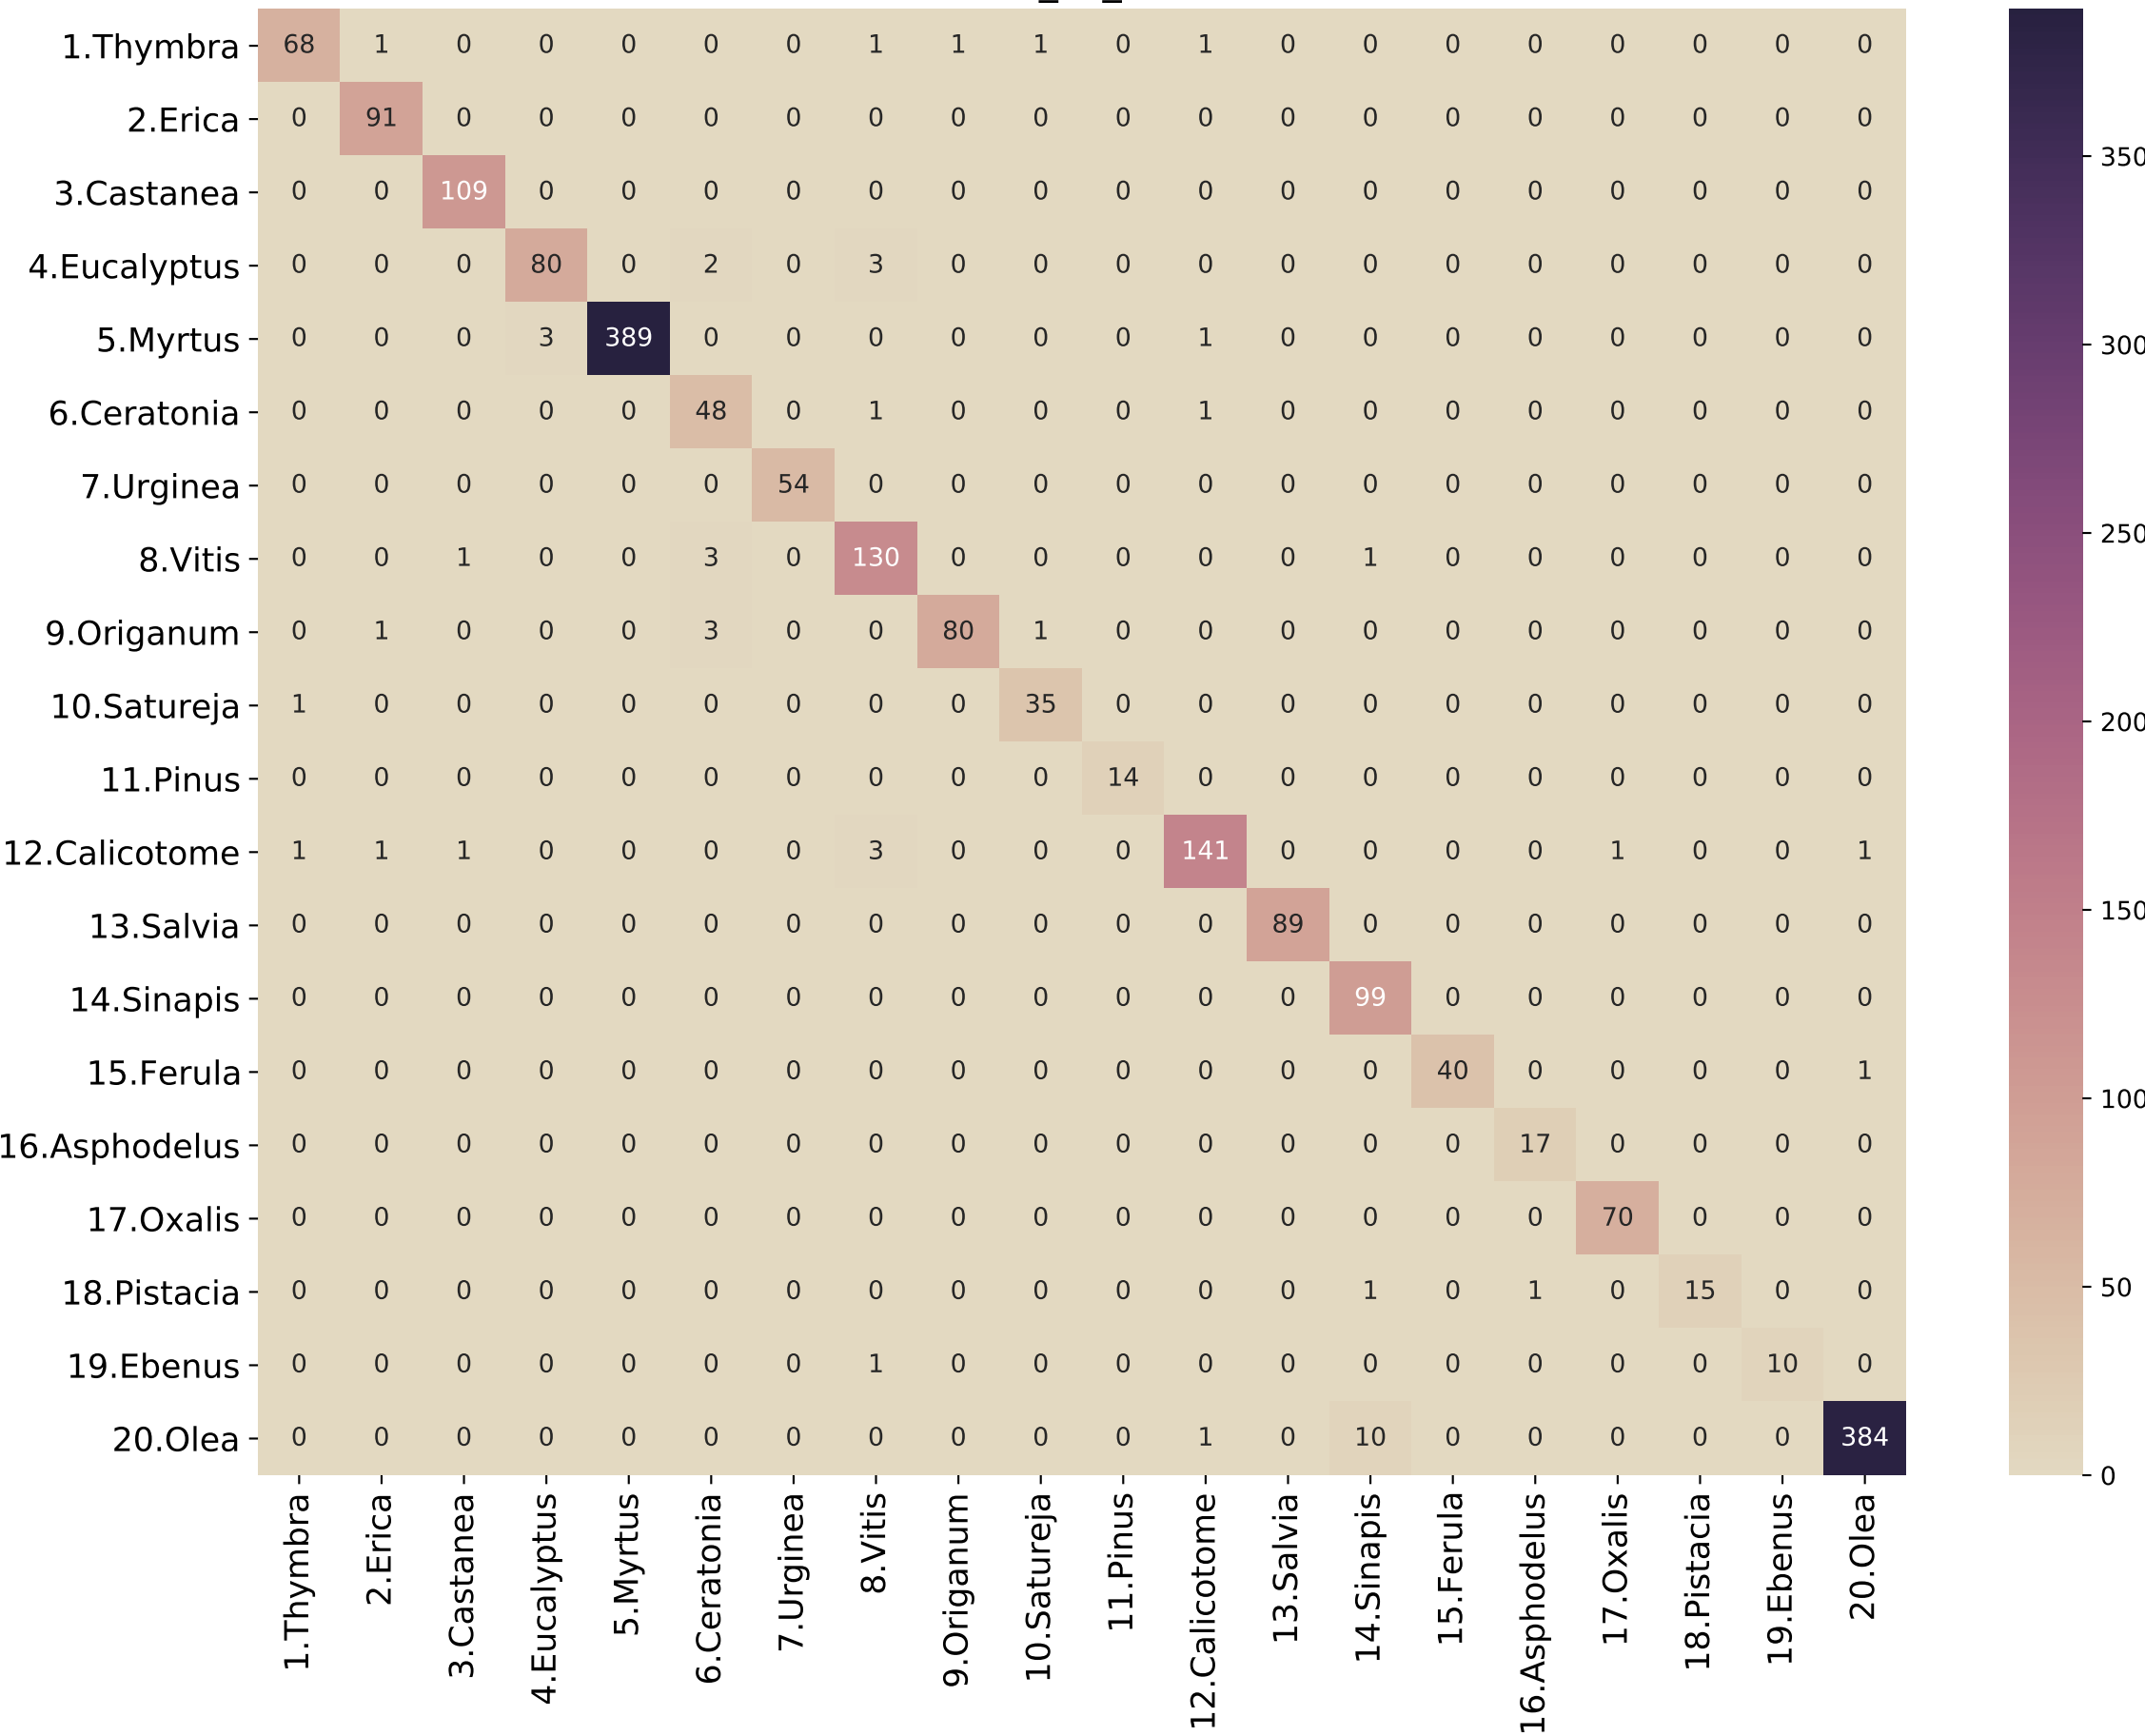

Supplement: s1 [file s1]

ens\_ir\_i\_r\_soft

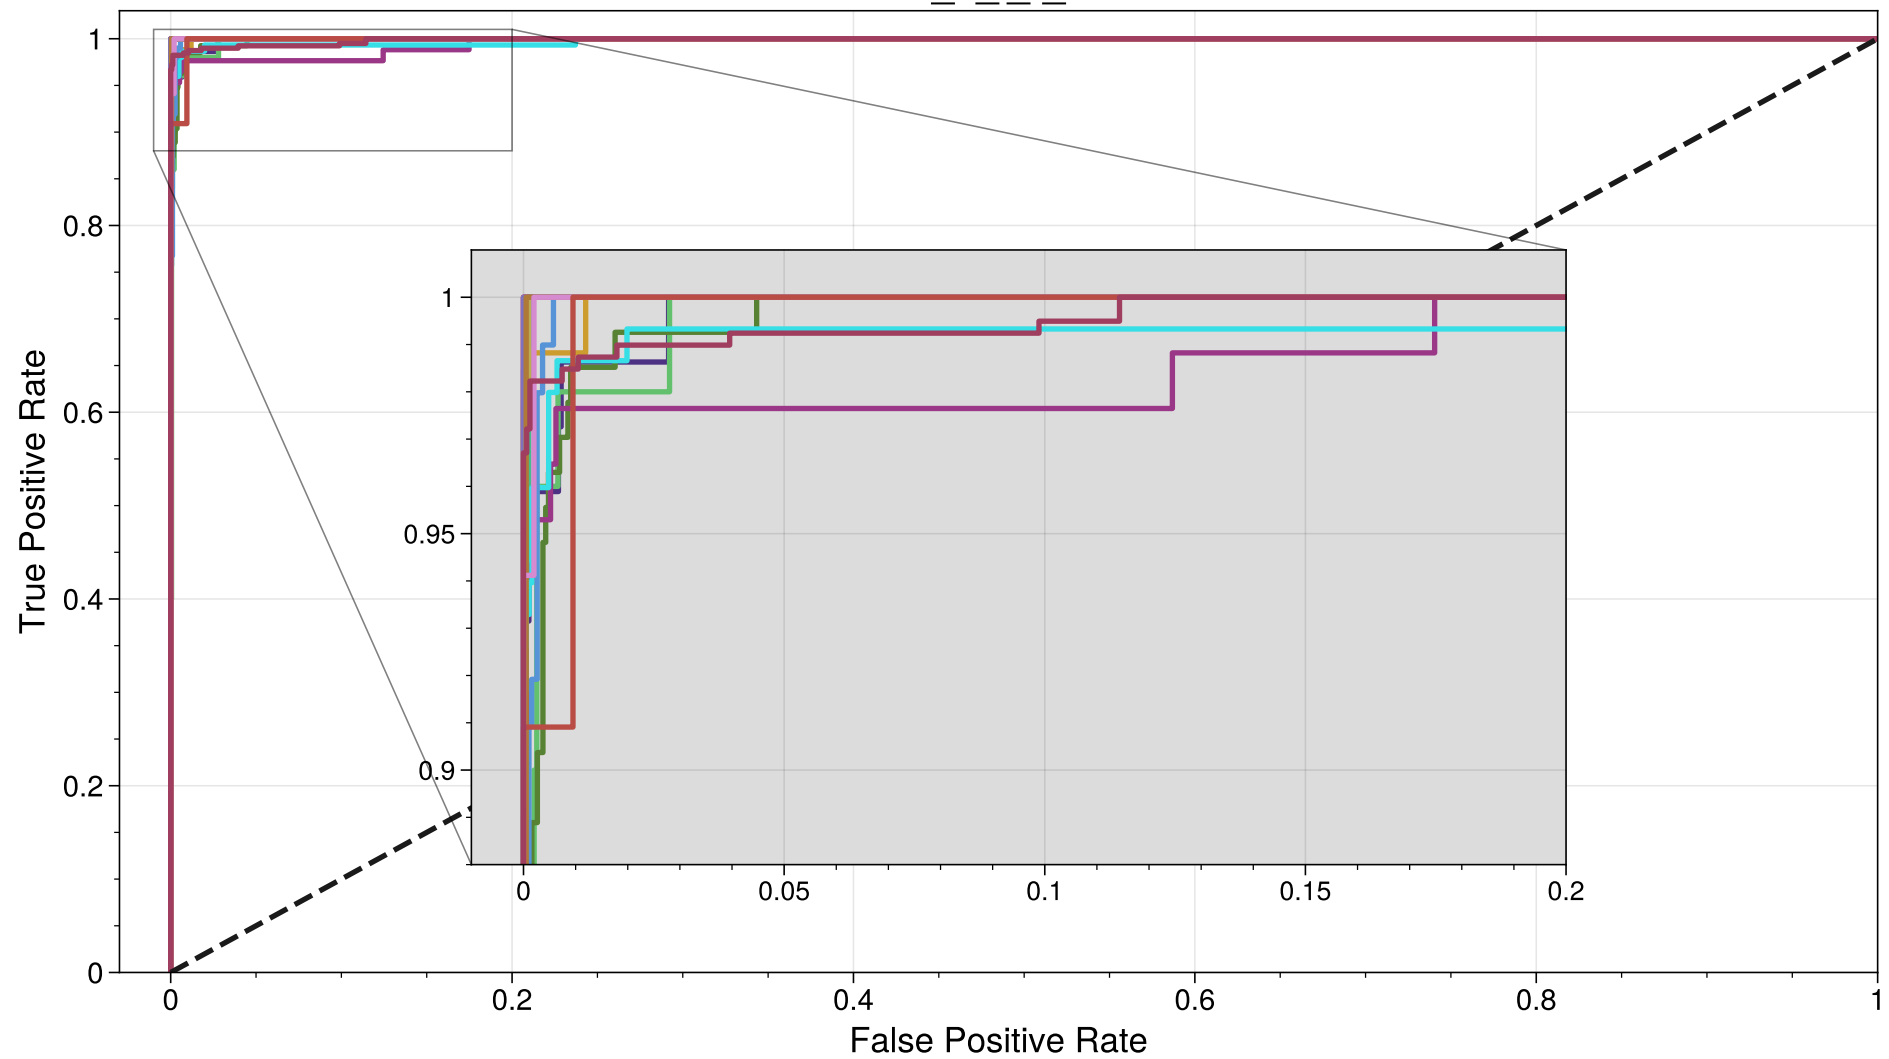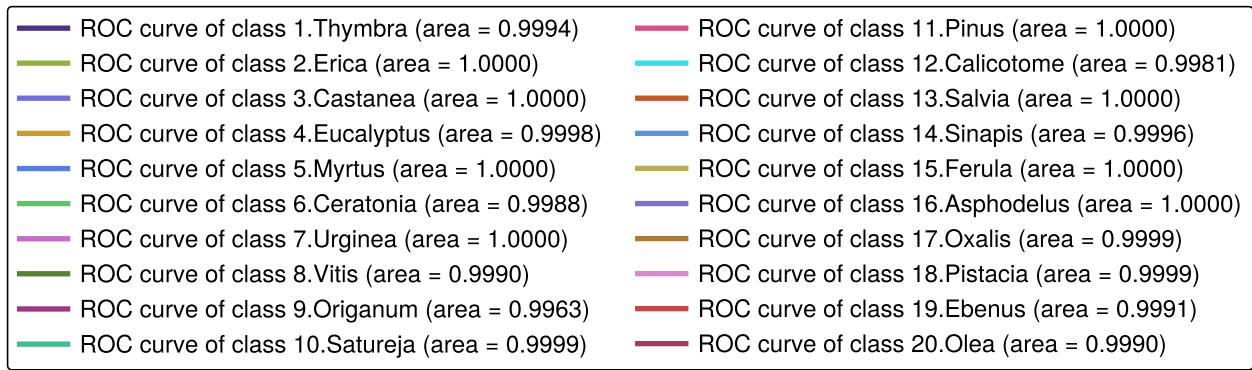

Supplement: s1 [file s1]

ens\_x\_ir\_r\_hard

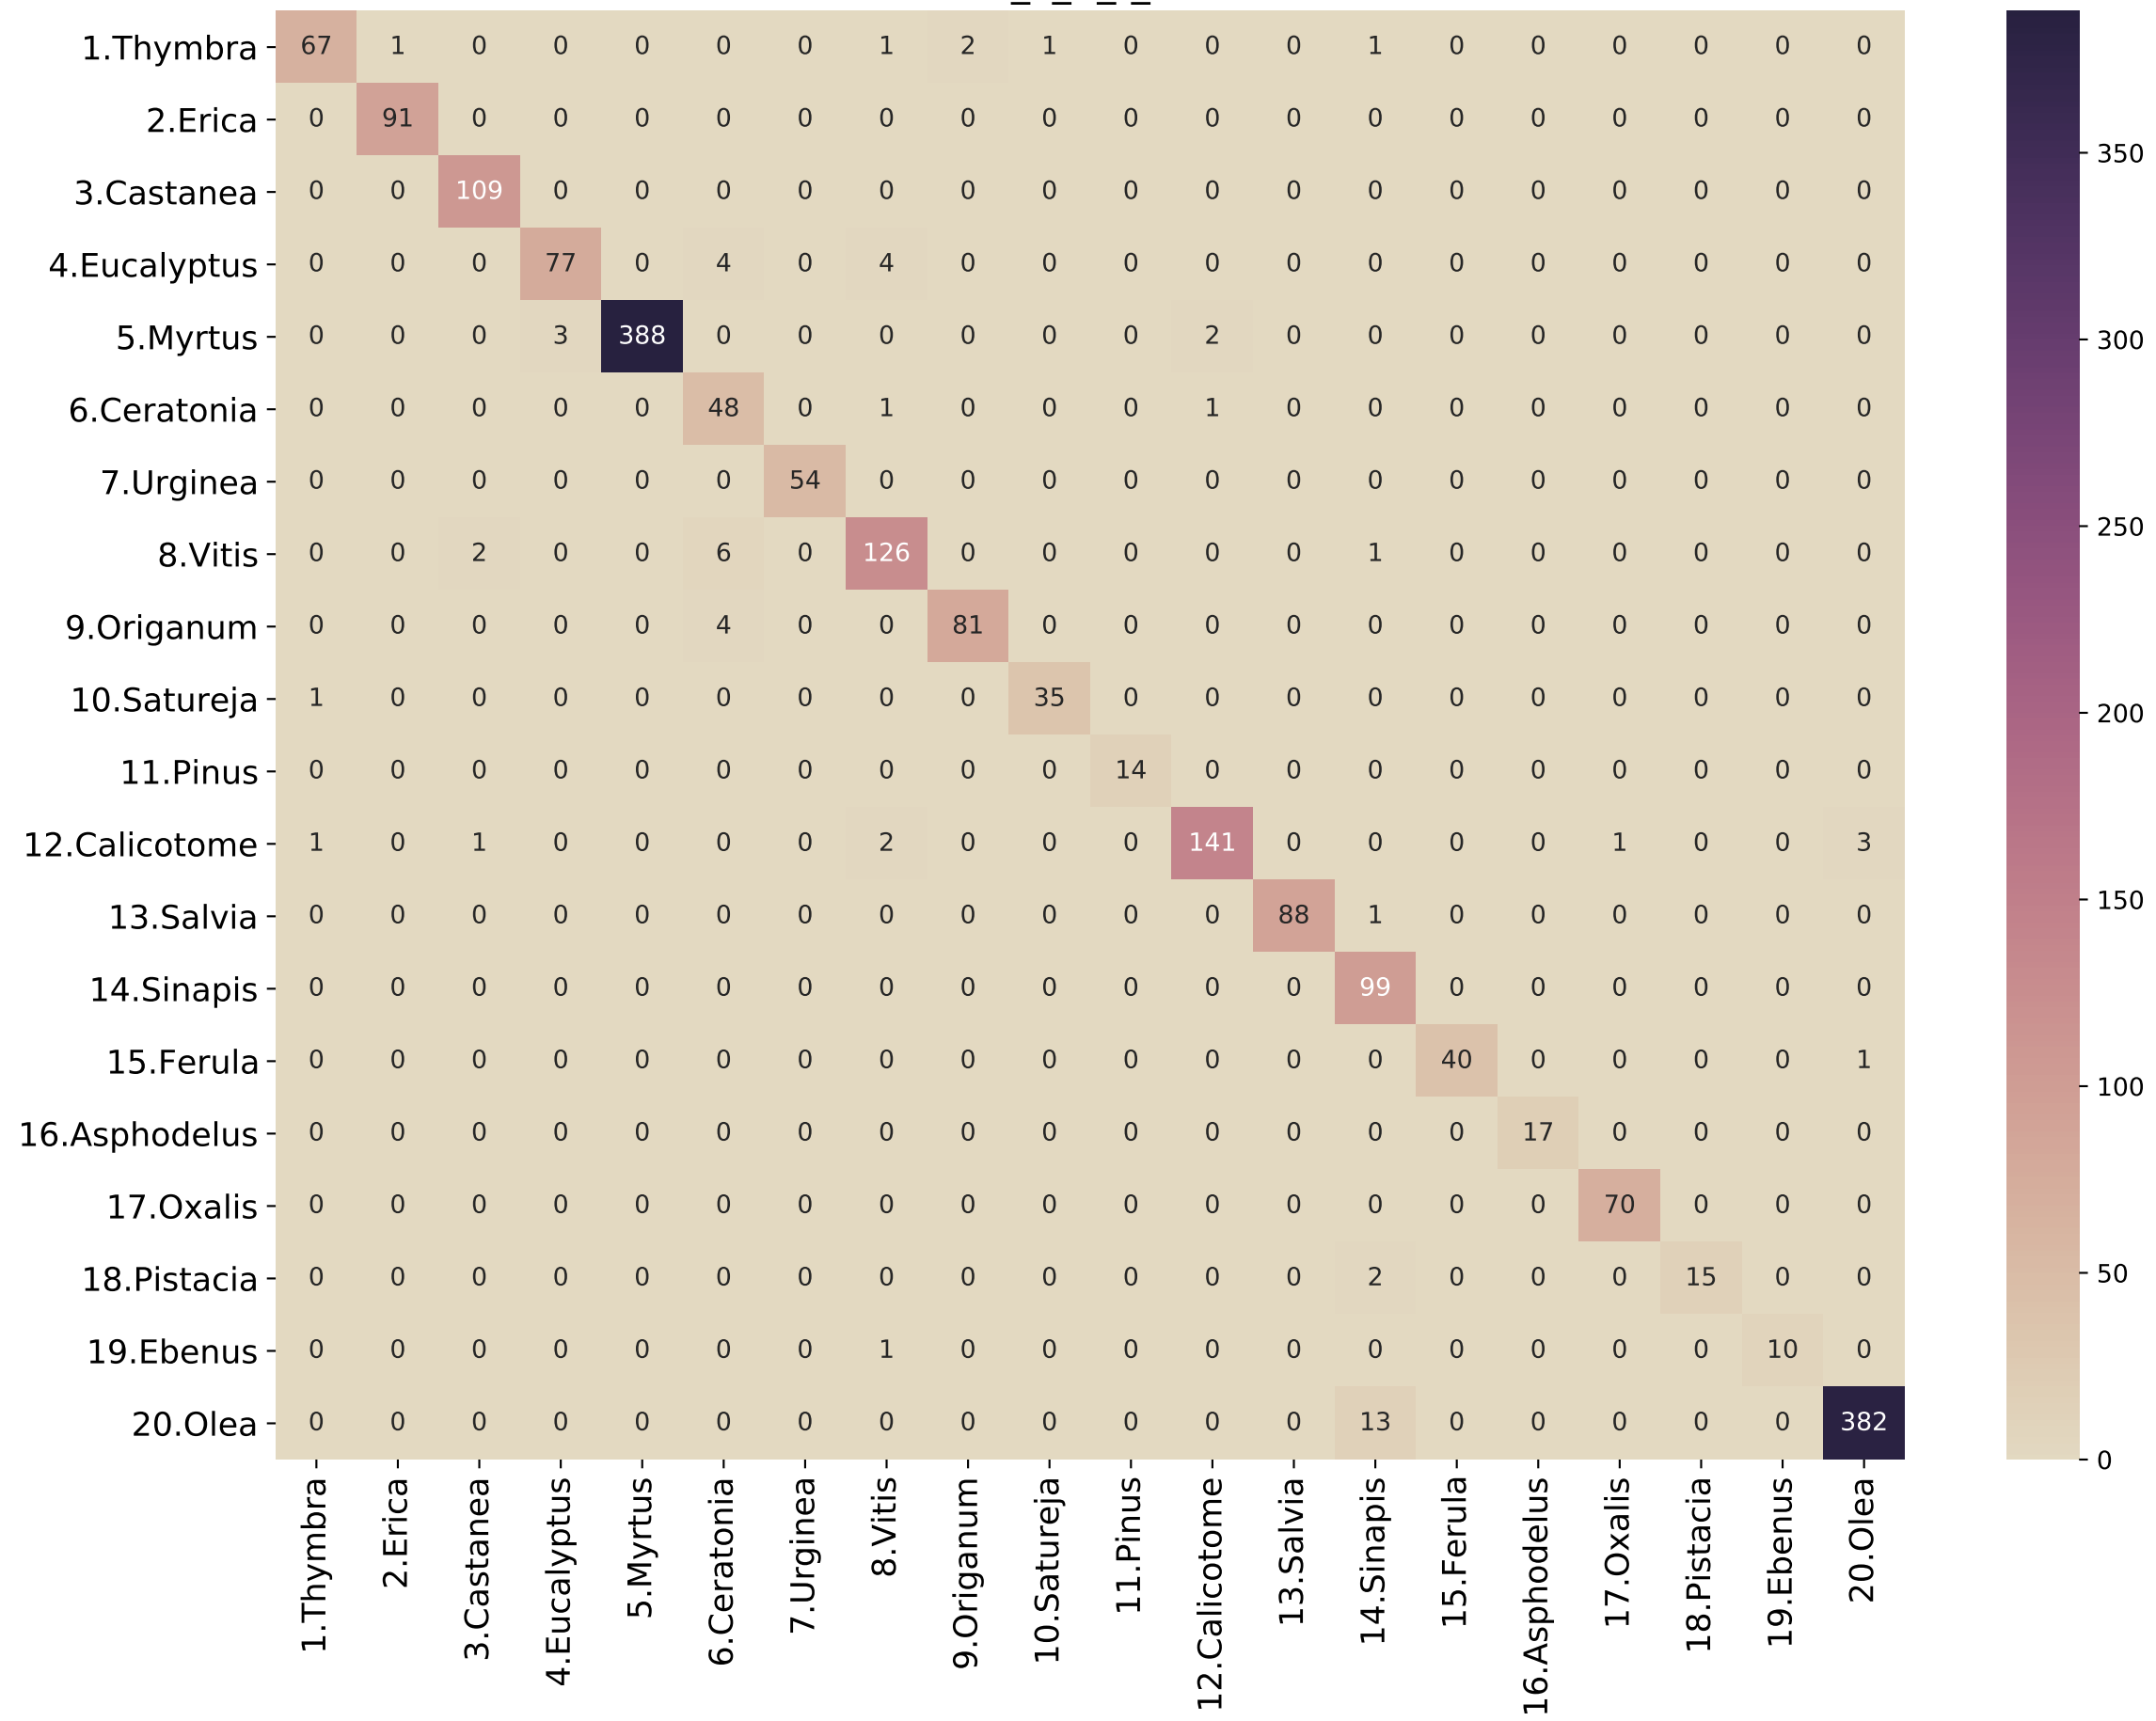

Supplement: s1 [file s1]

resnet

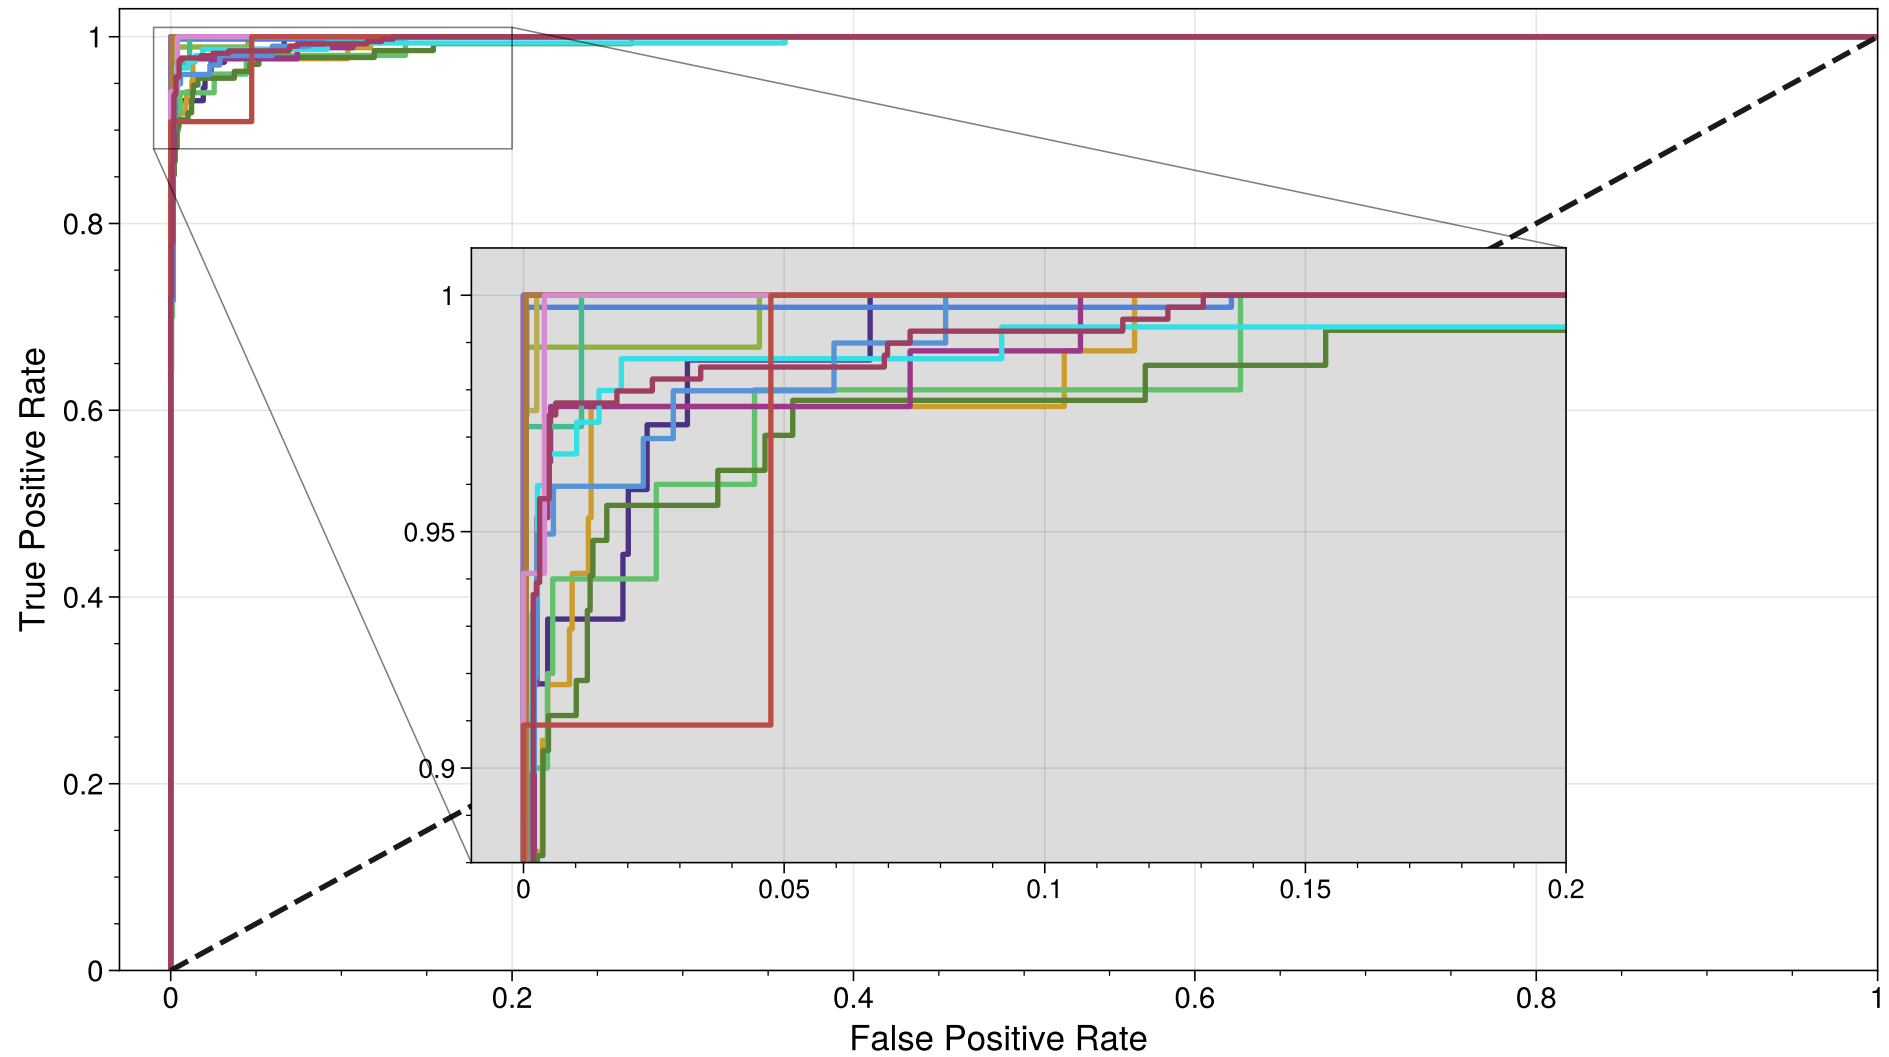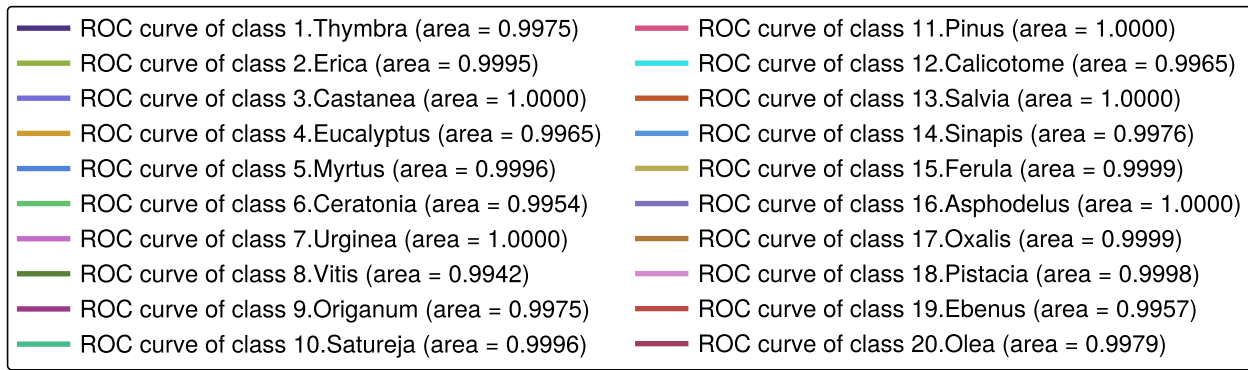

Supplement: s1 [file s1]

ens\_i\_r\_soft

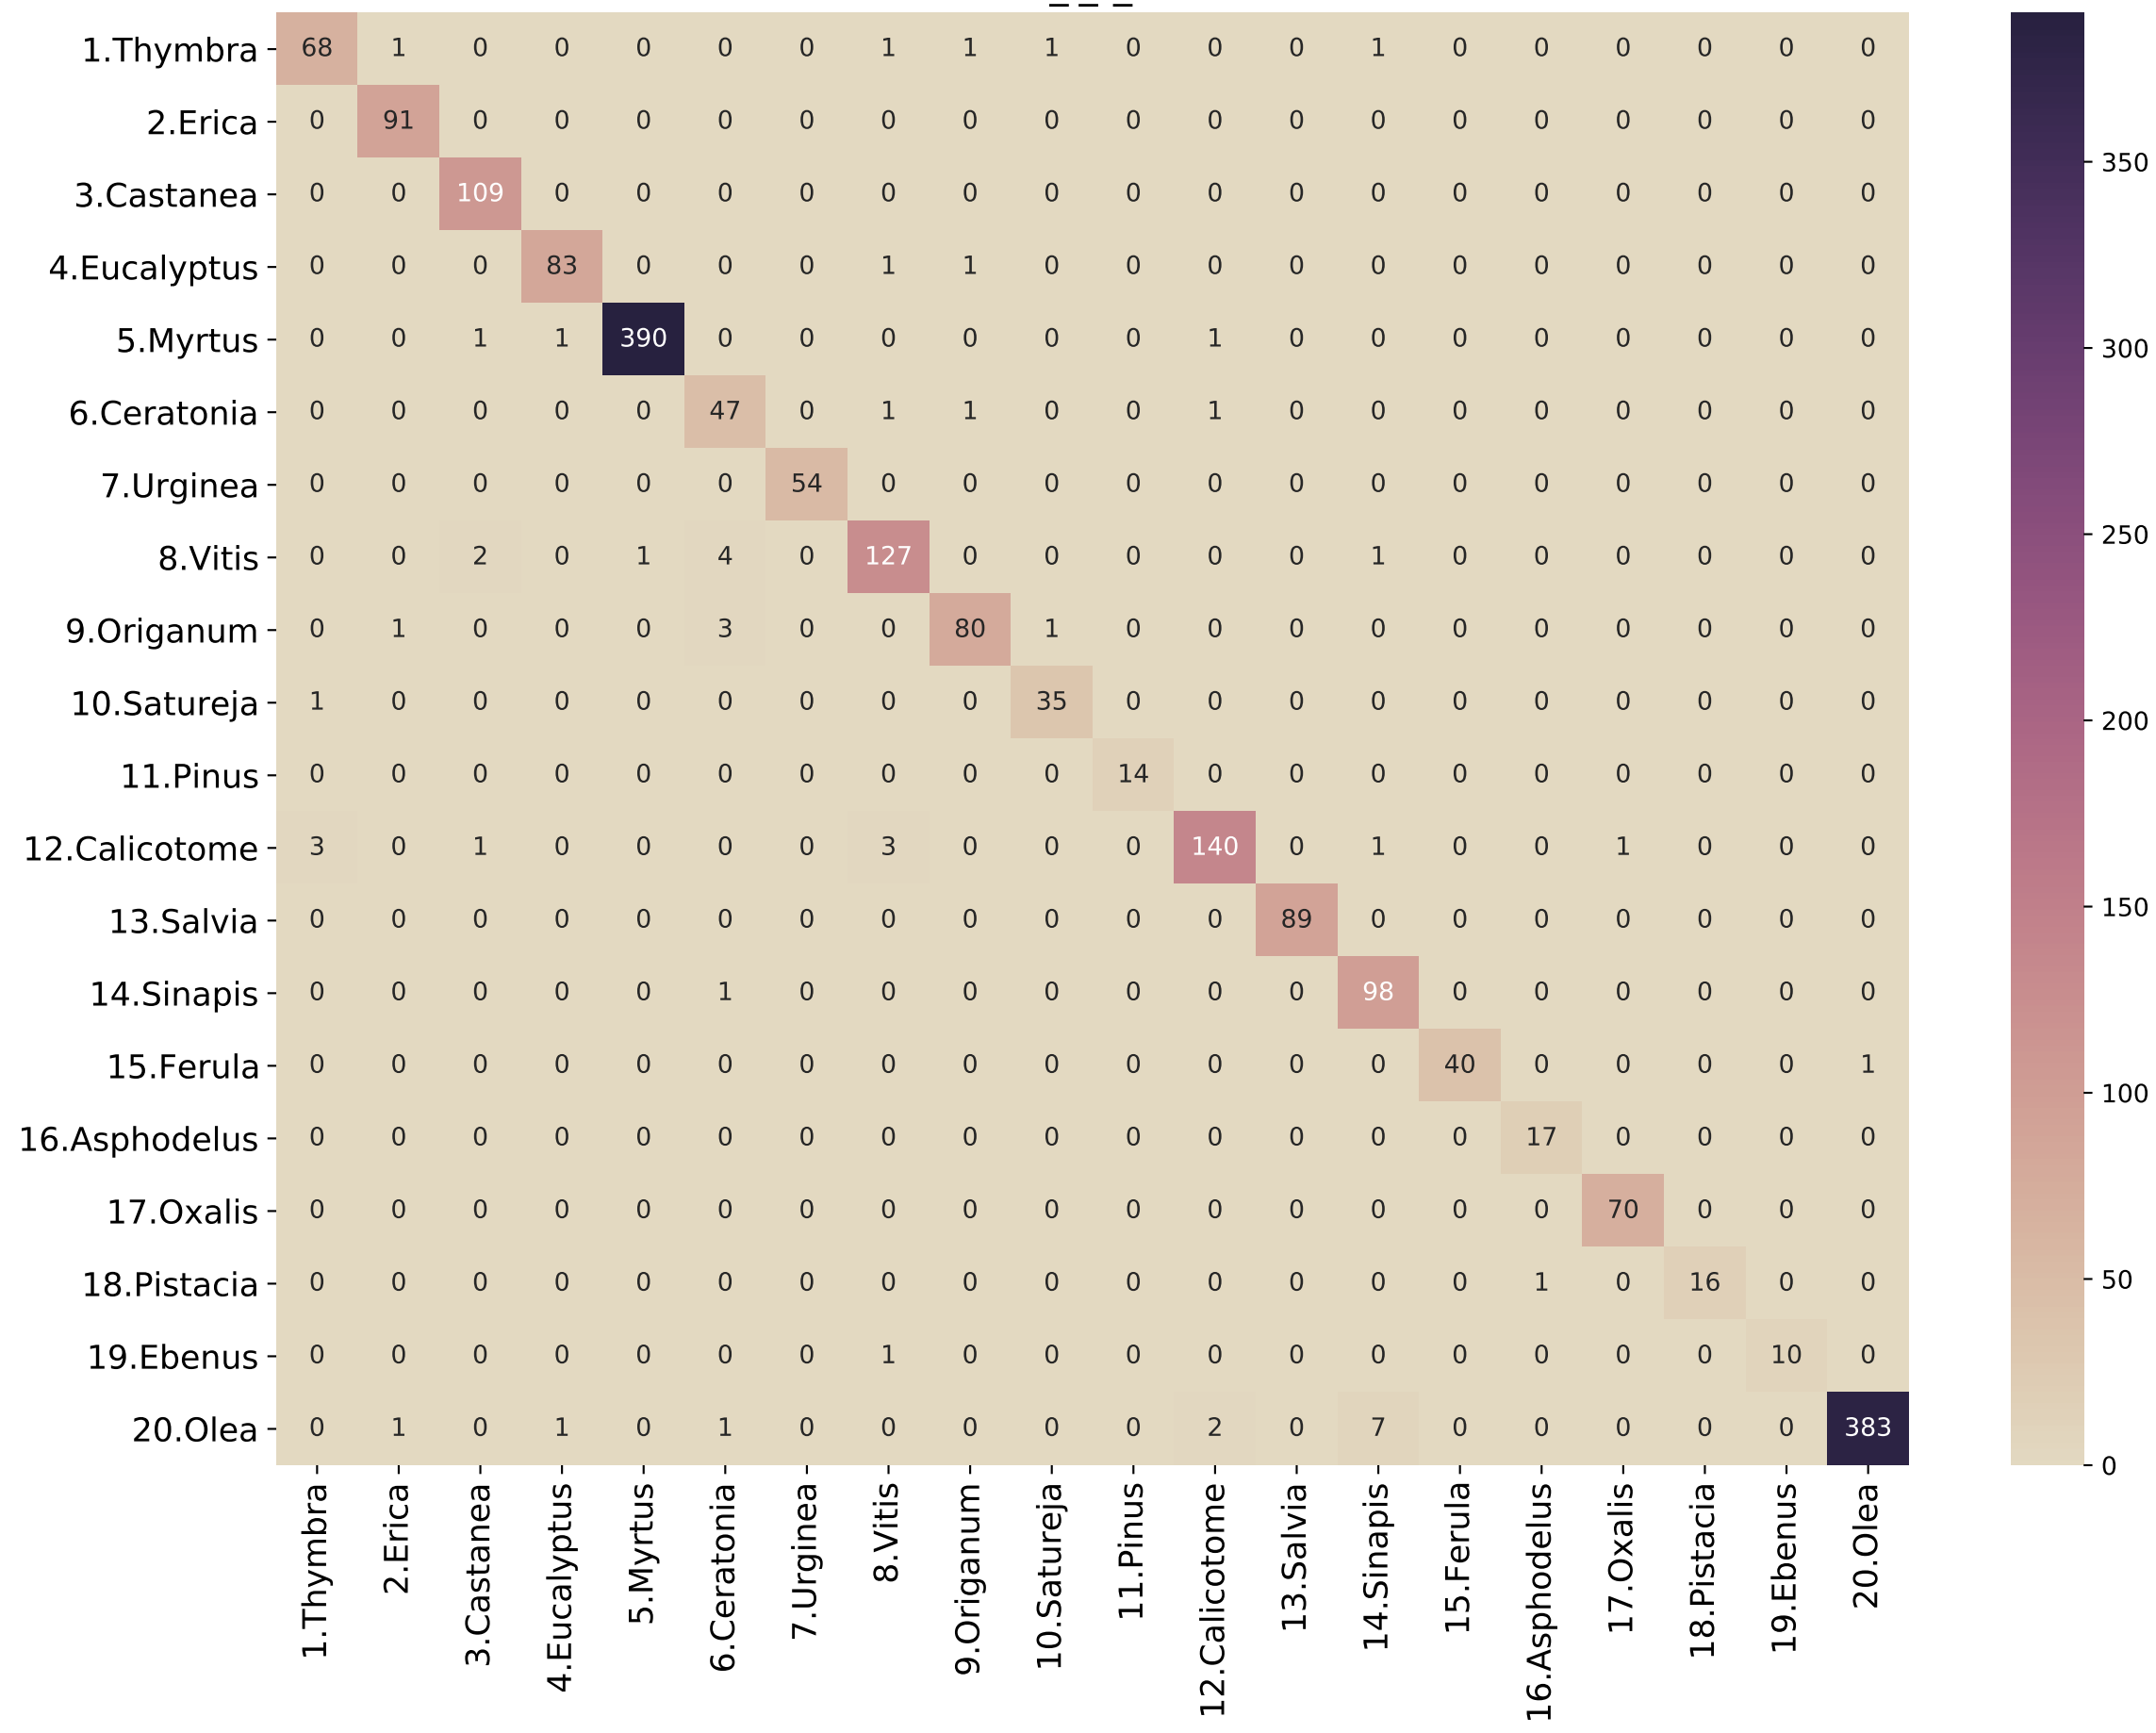

Supplement: s1 [file s1]

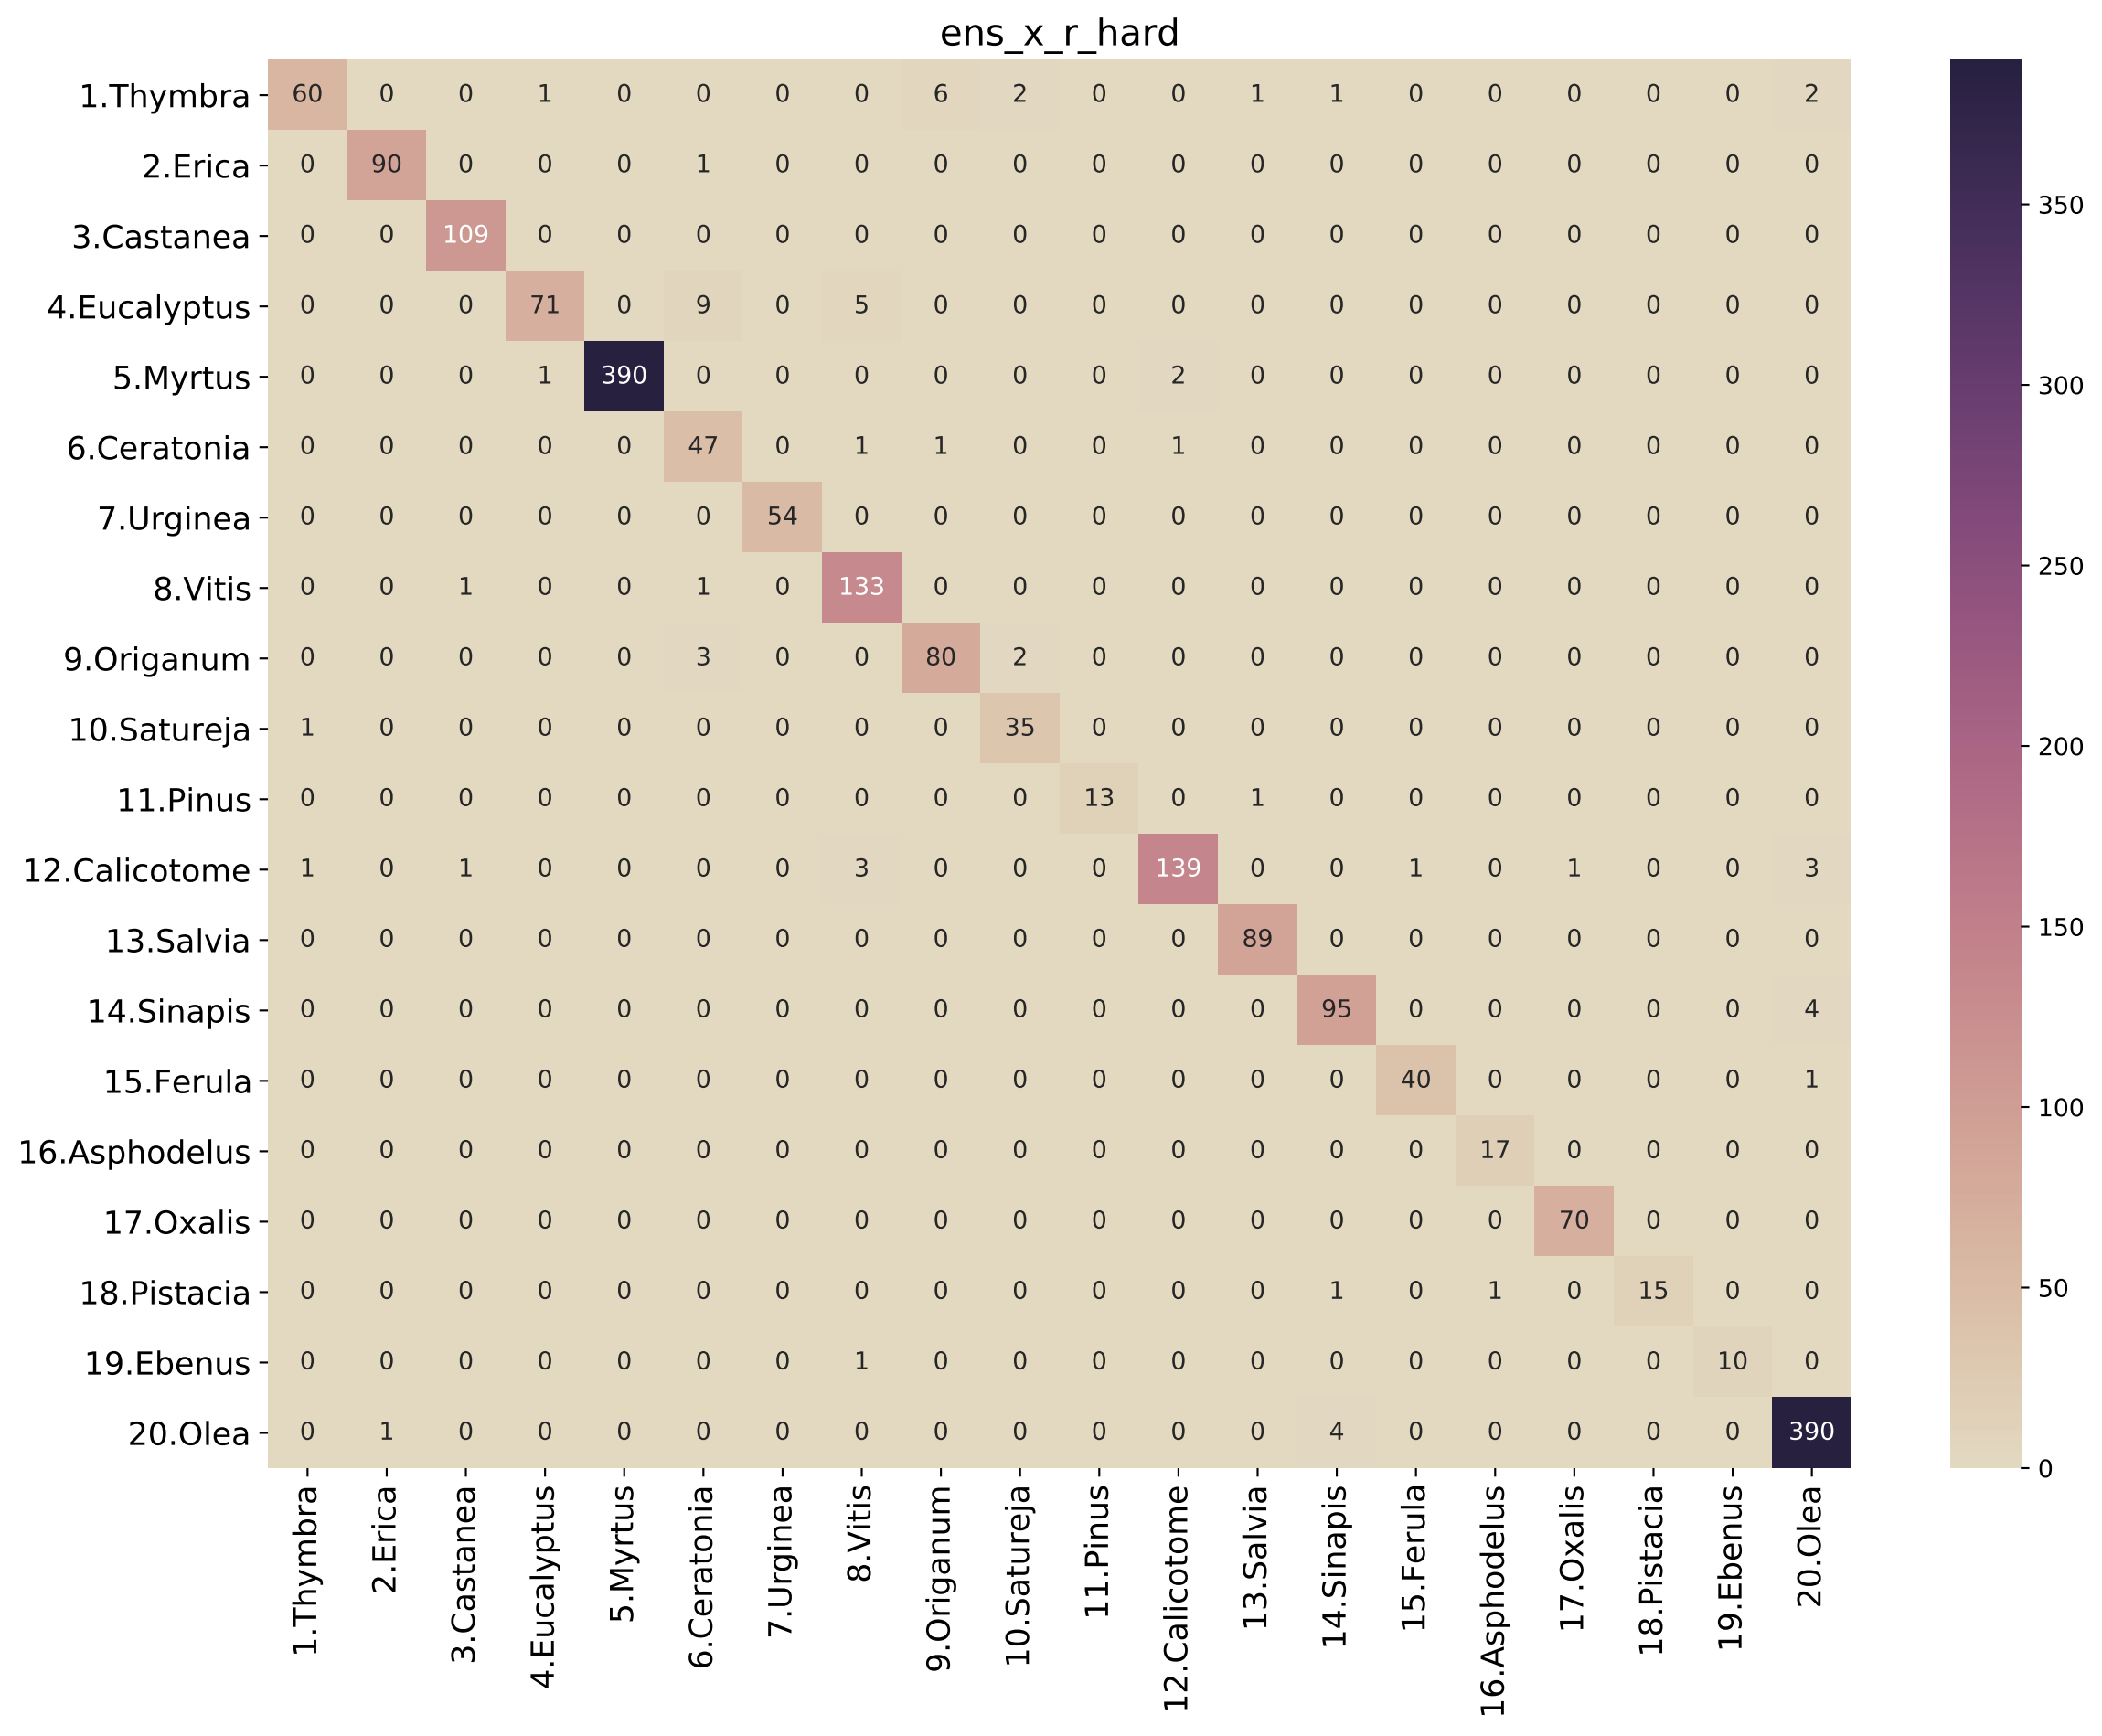

Supplement: s1 [file s1]

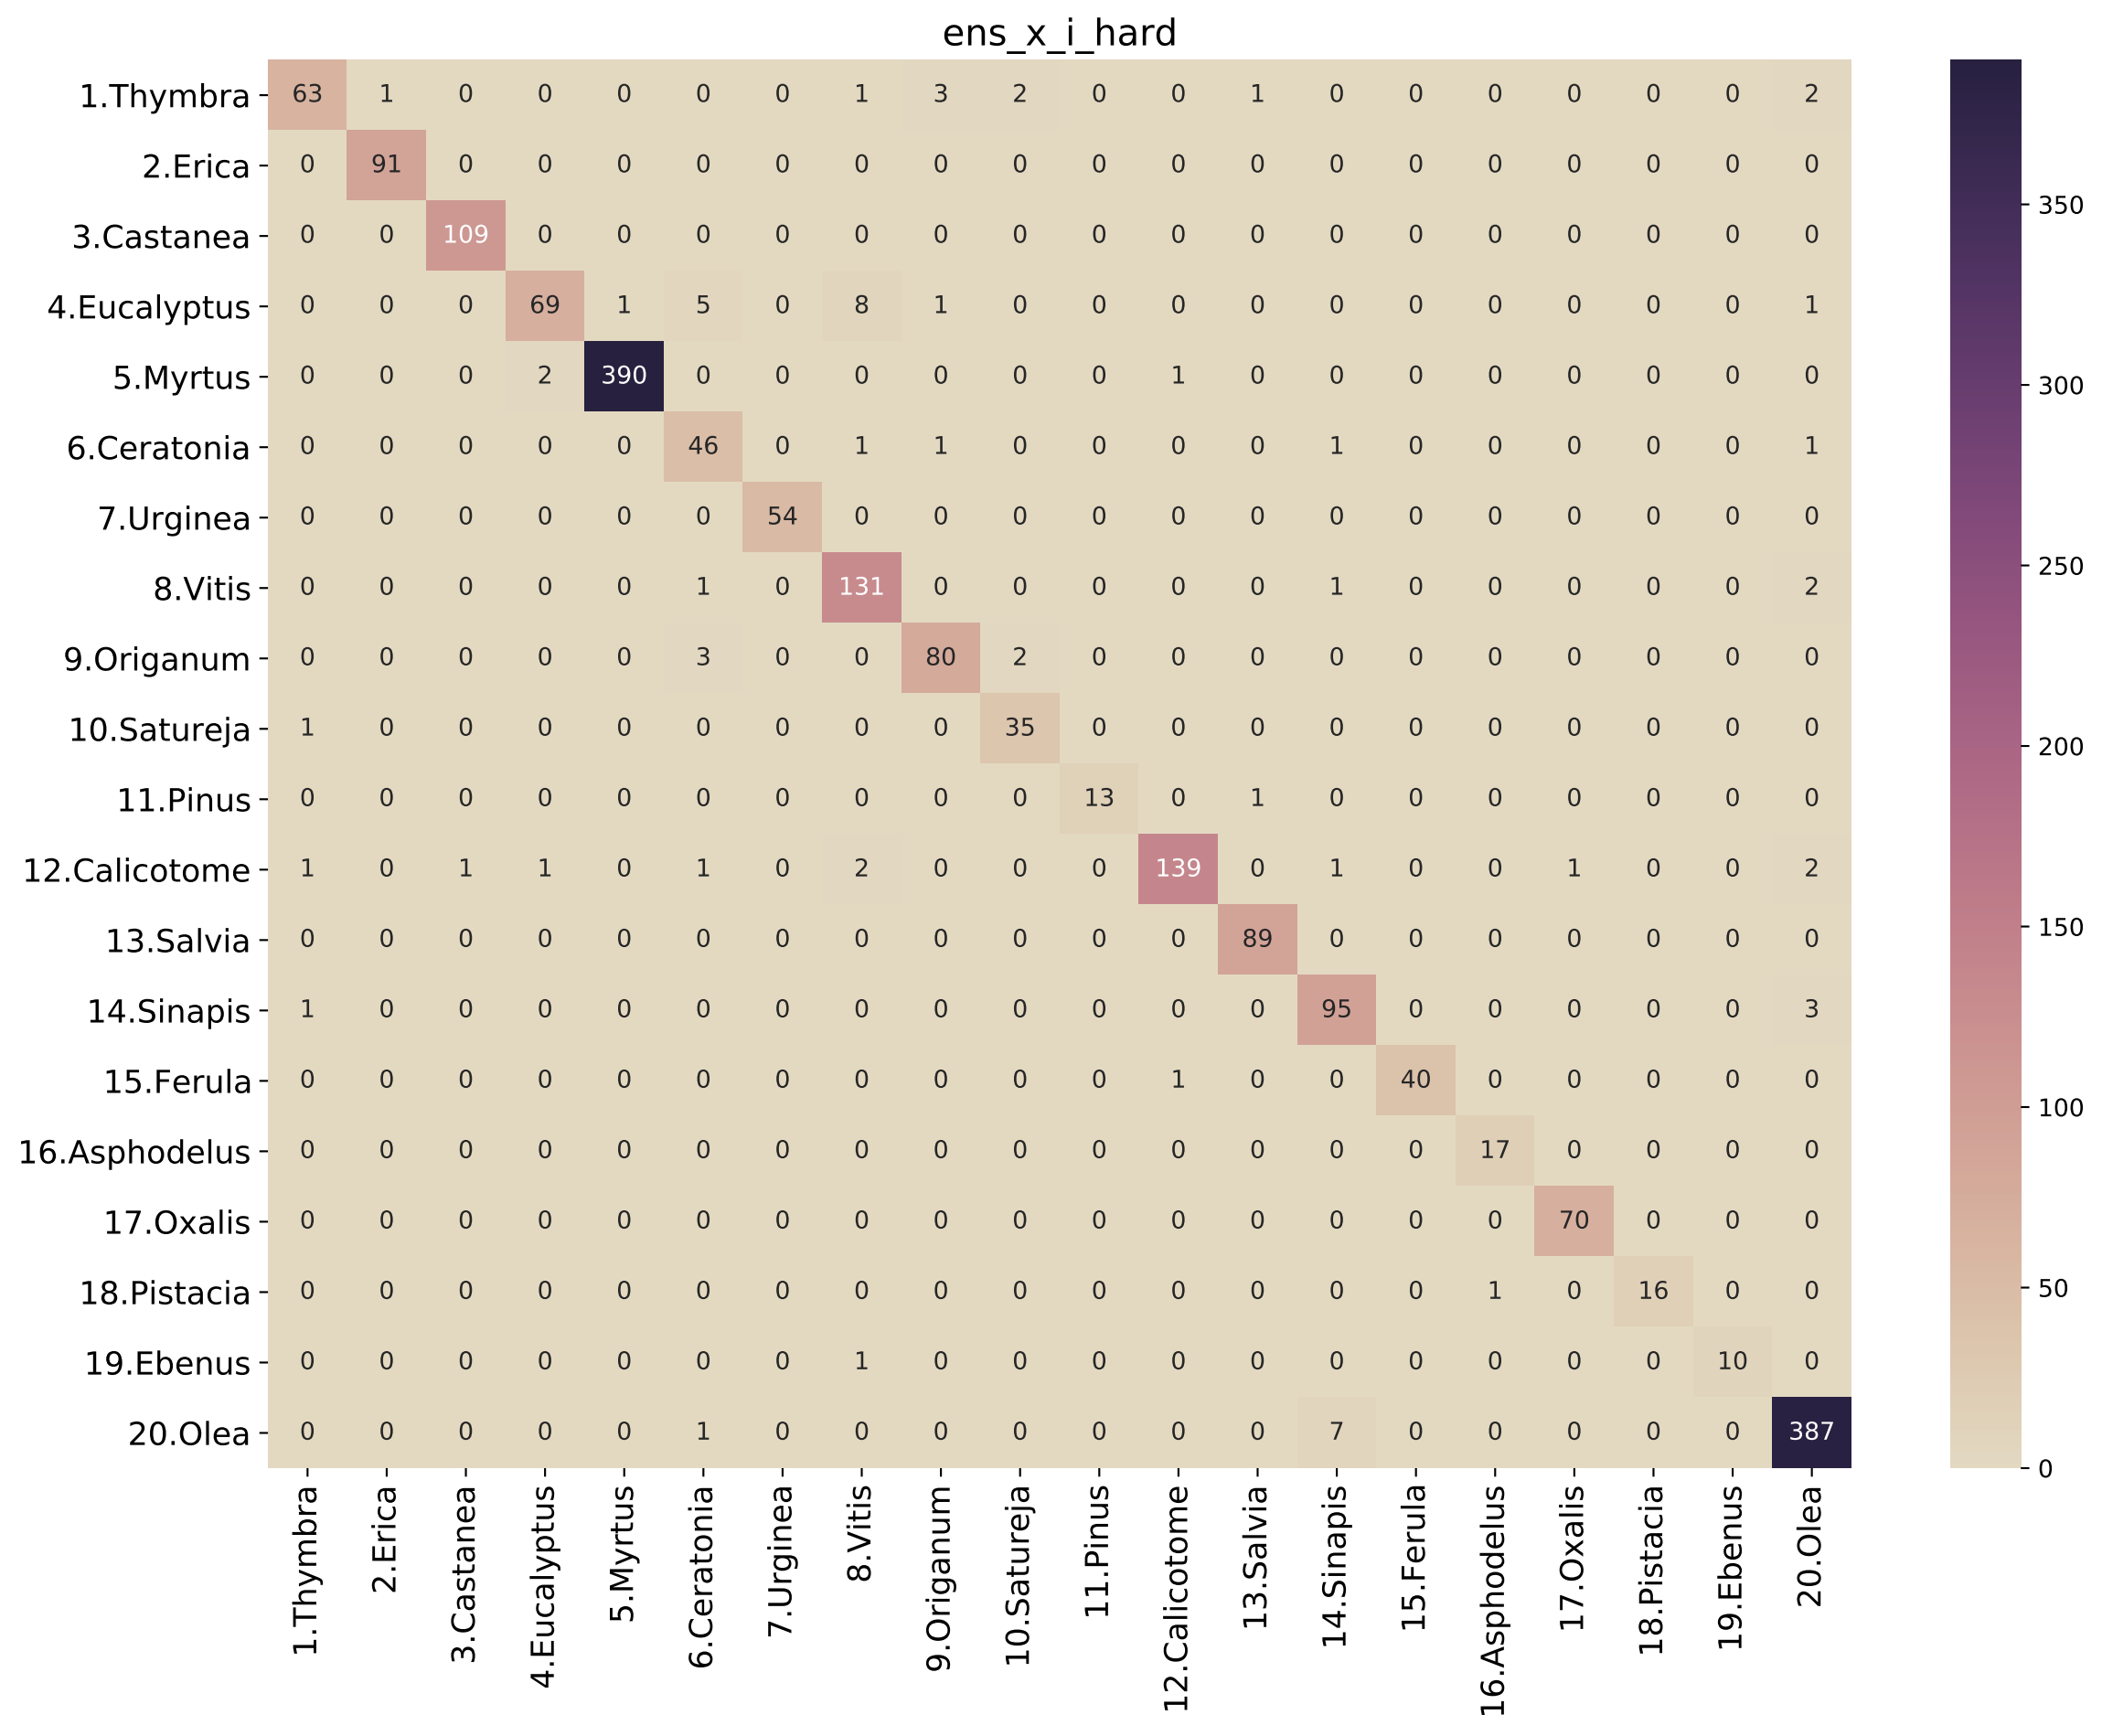

Supplement: s1 [file s1]

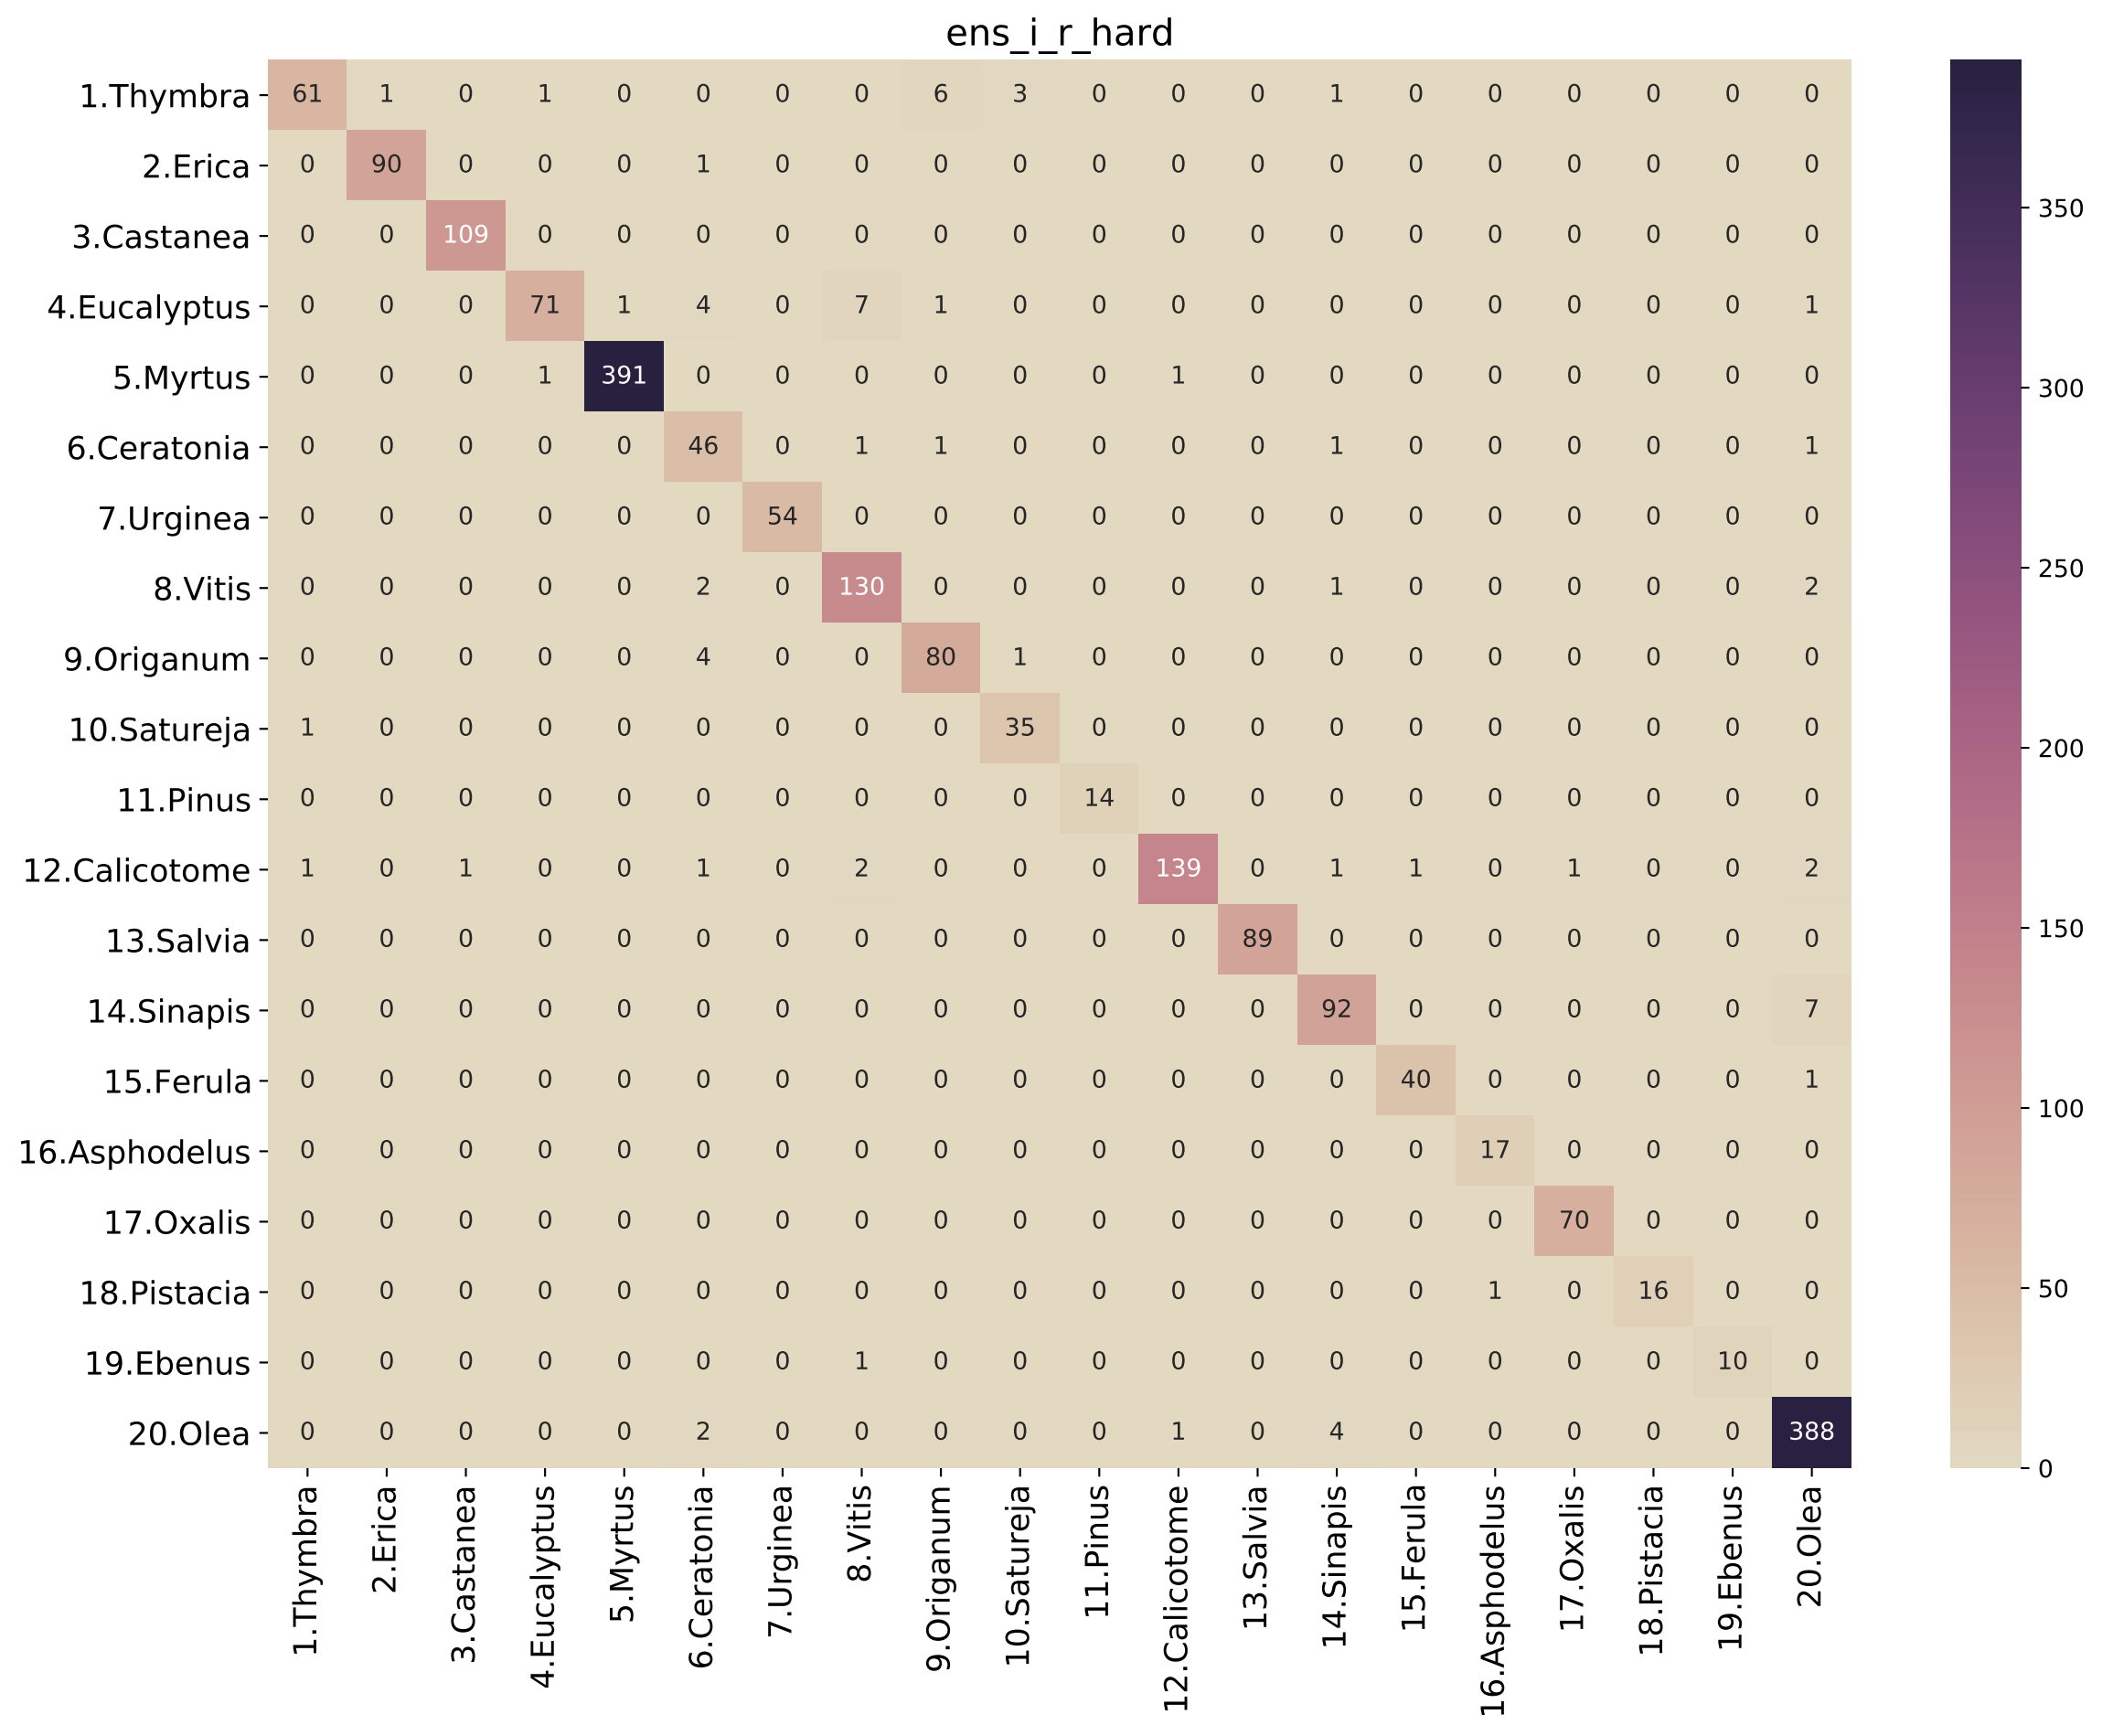

Supplement: s1 [file s1]

# inception

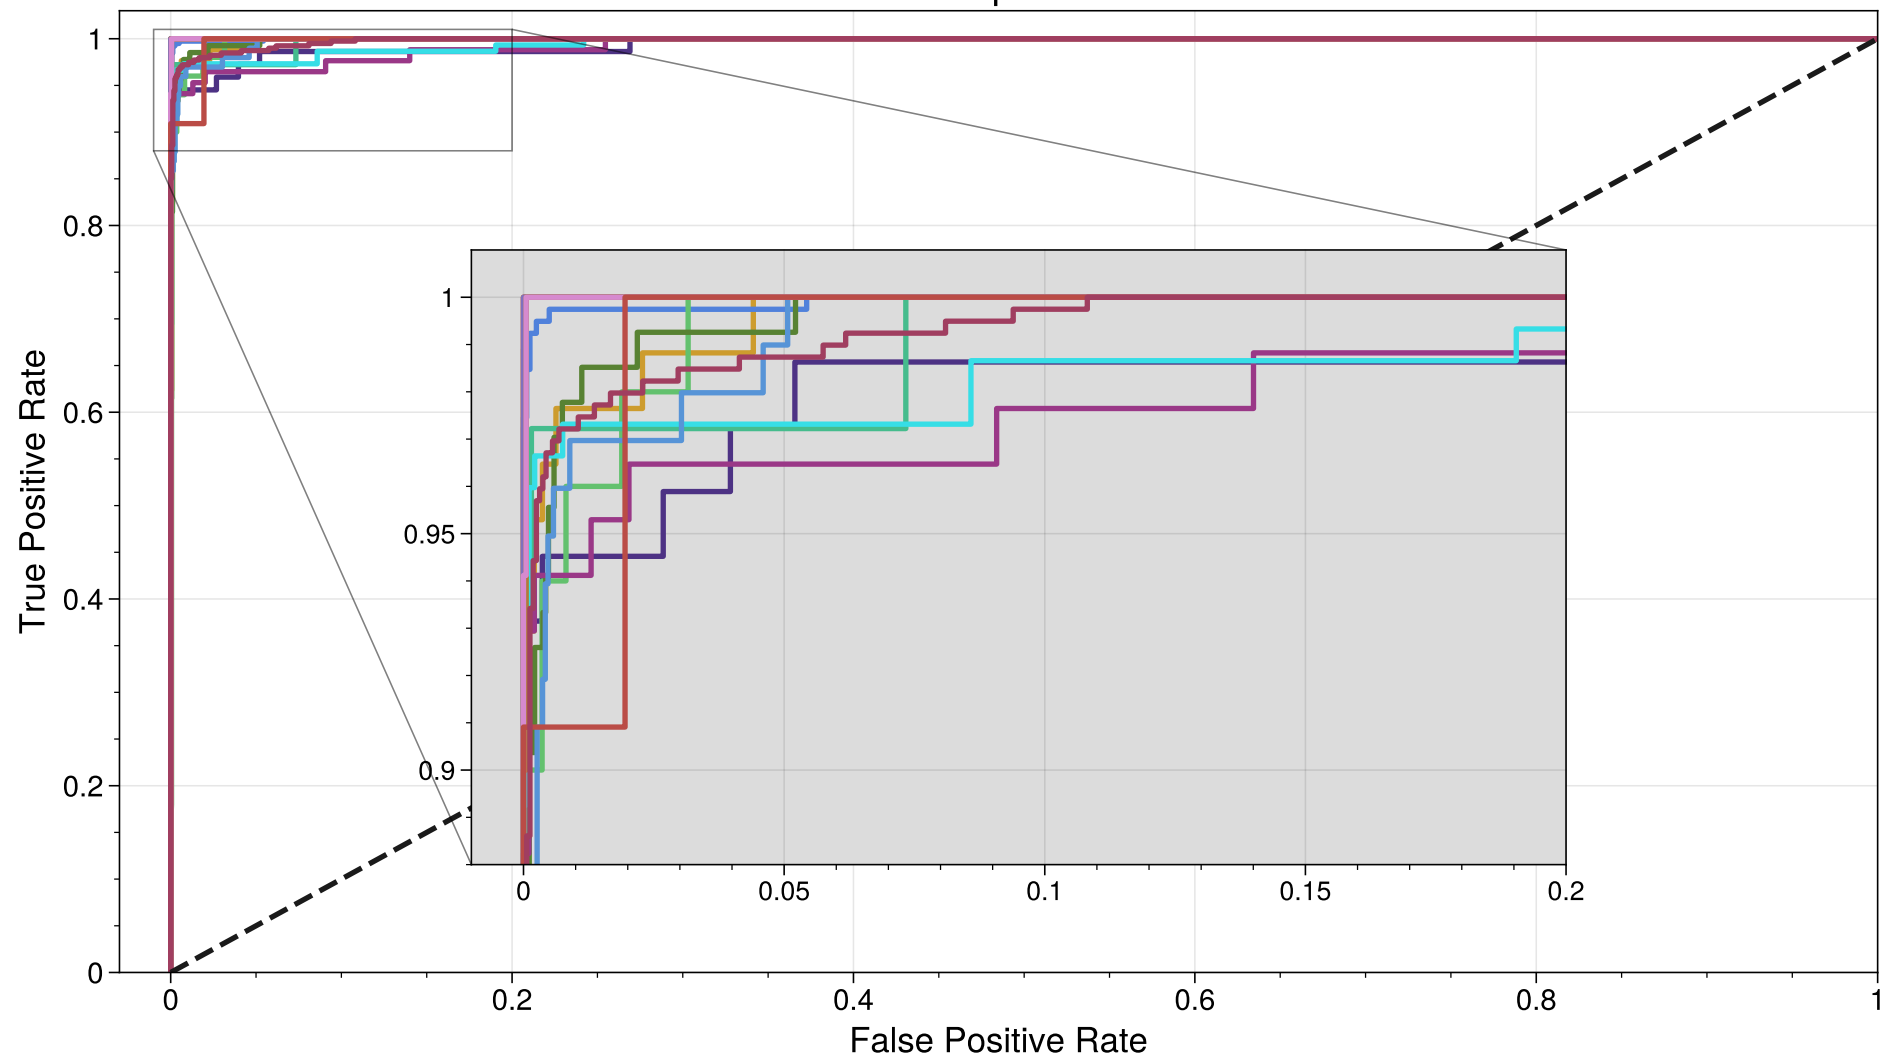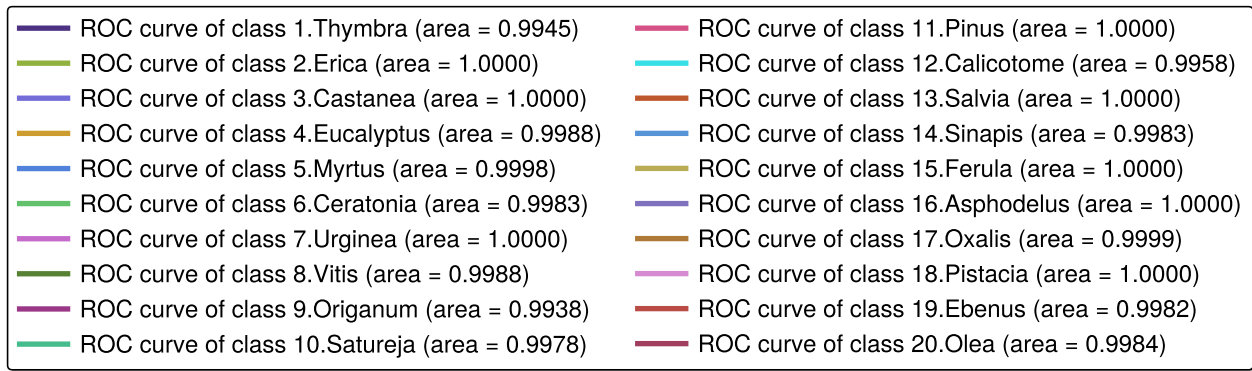

Supplement: s1 [file s1]

inception\_resnet

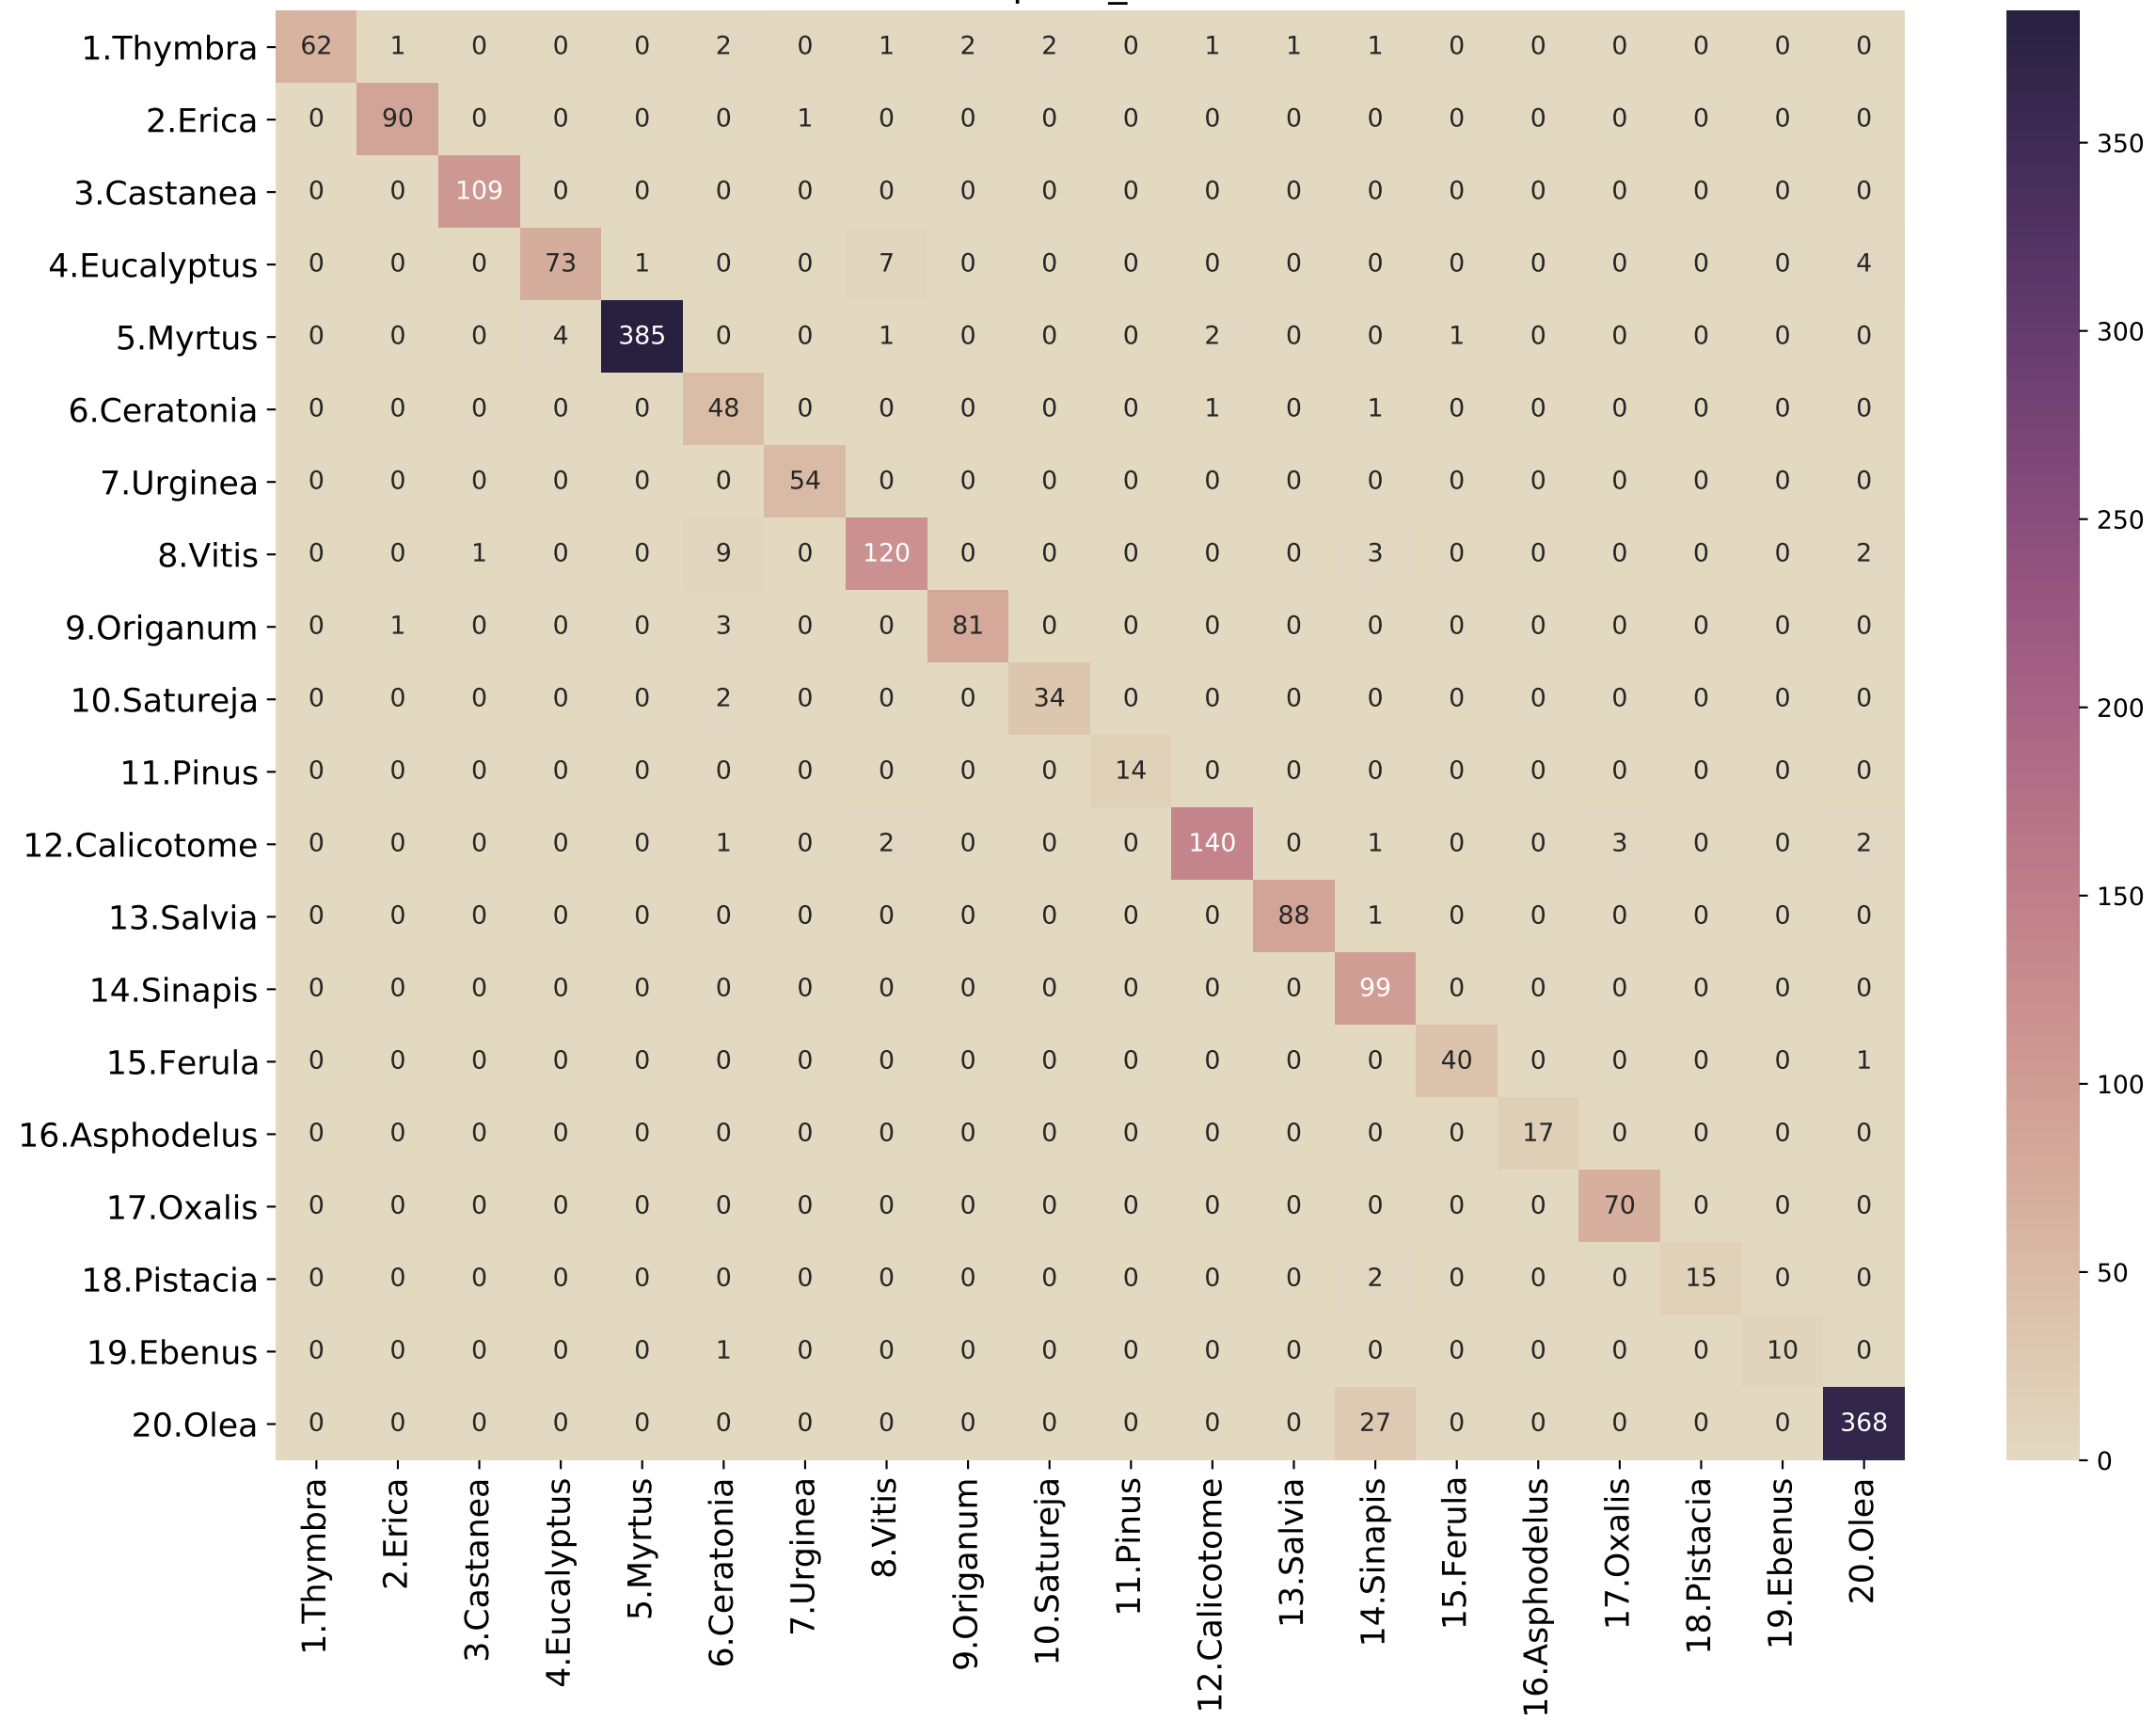

Supplement: s1 [file s1]

ens\_ir\_r\_soft

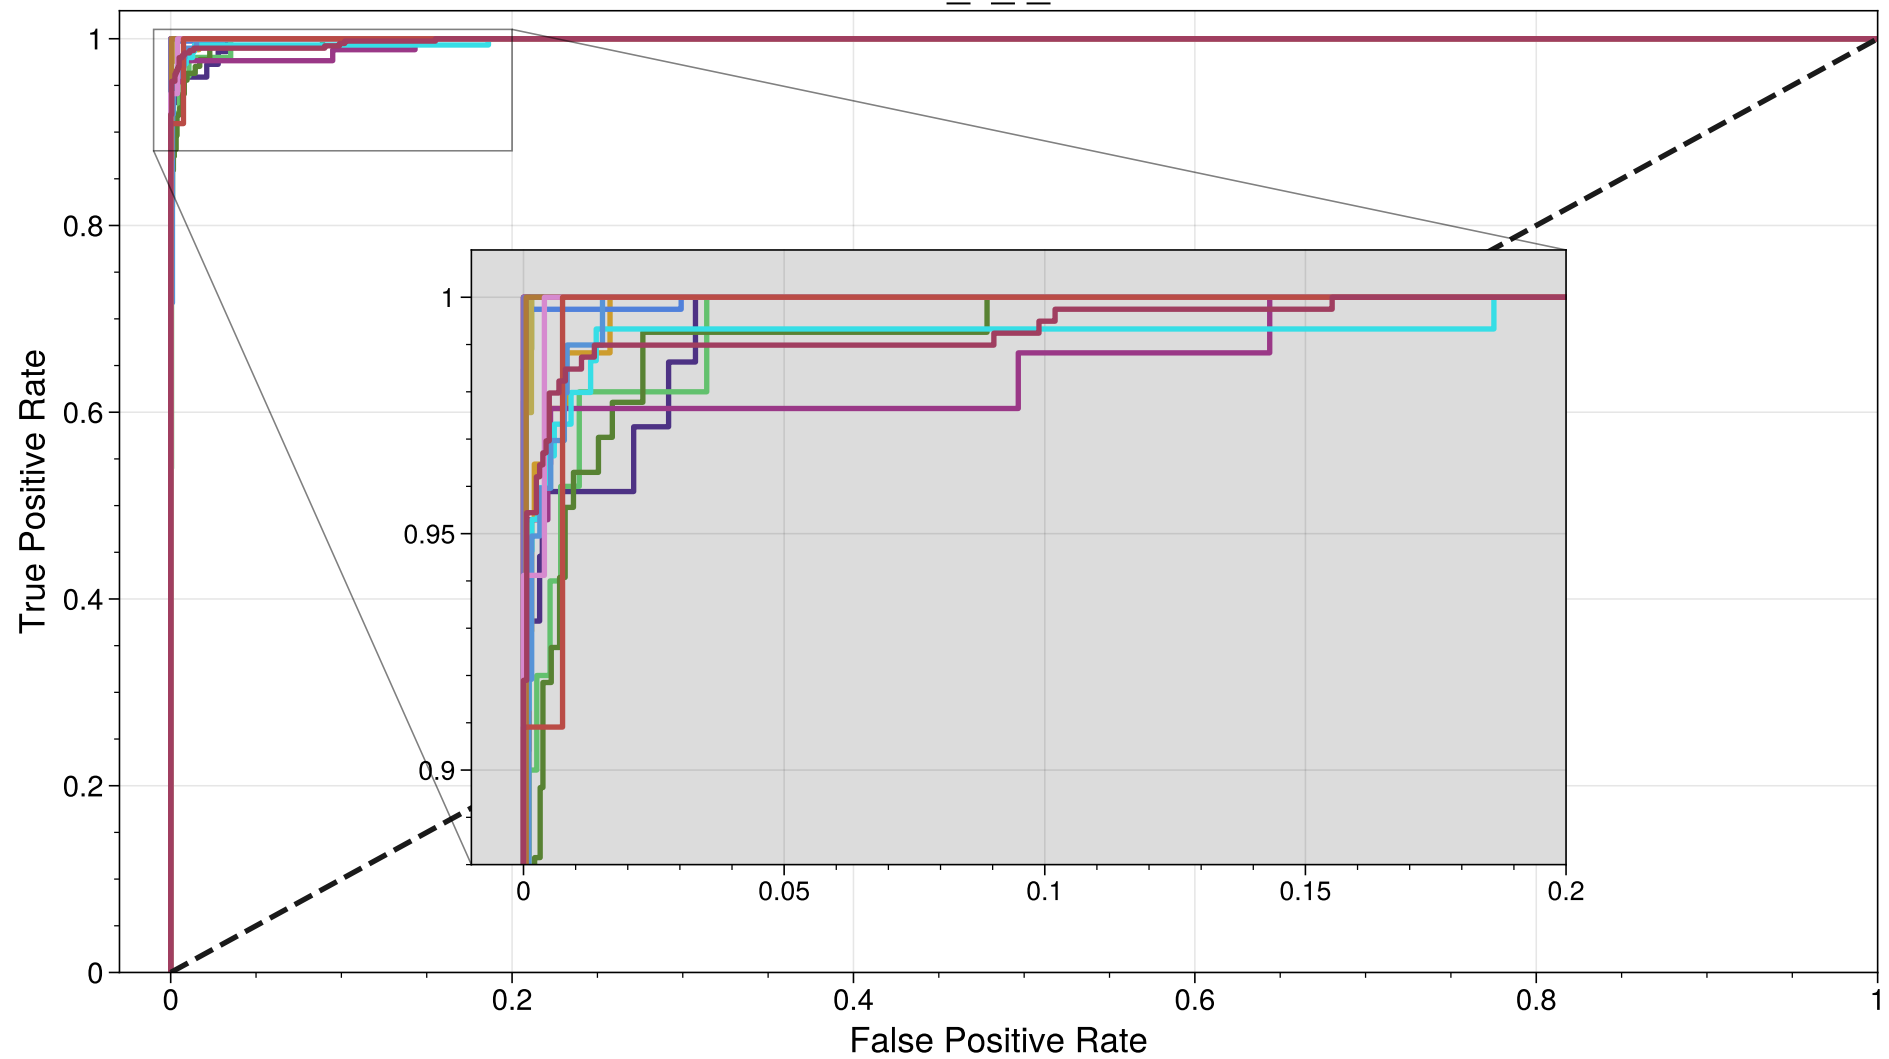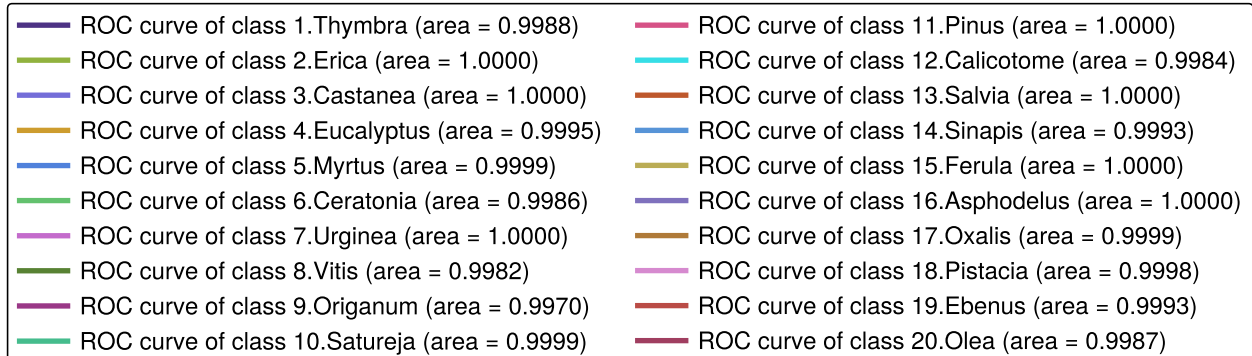

Supplement: s1 [file s1]

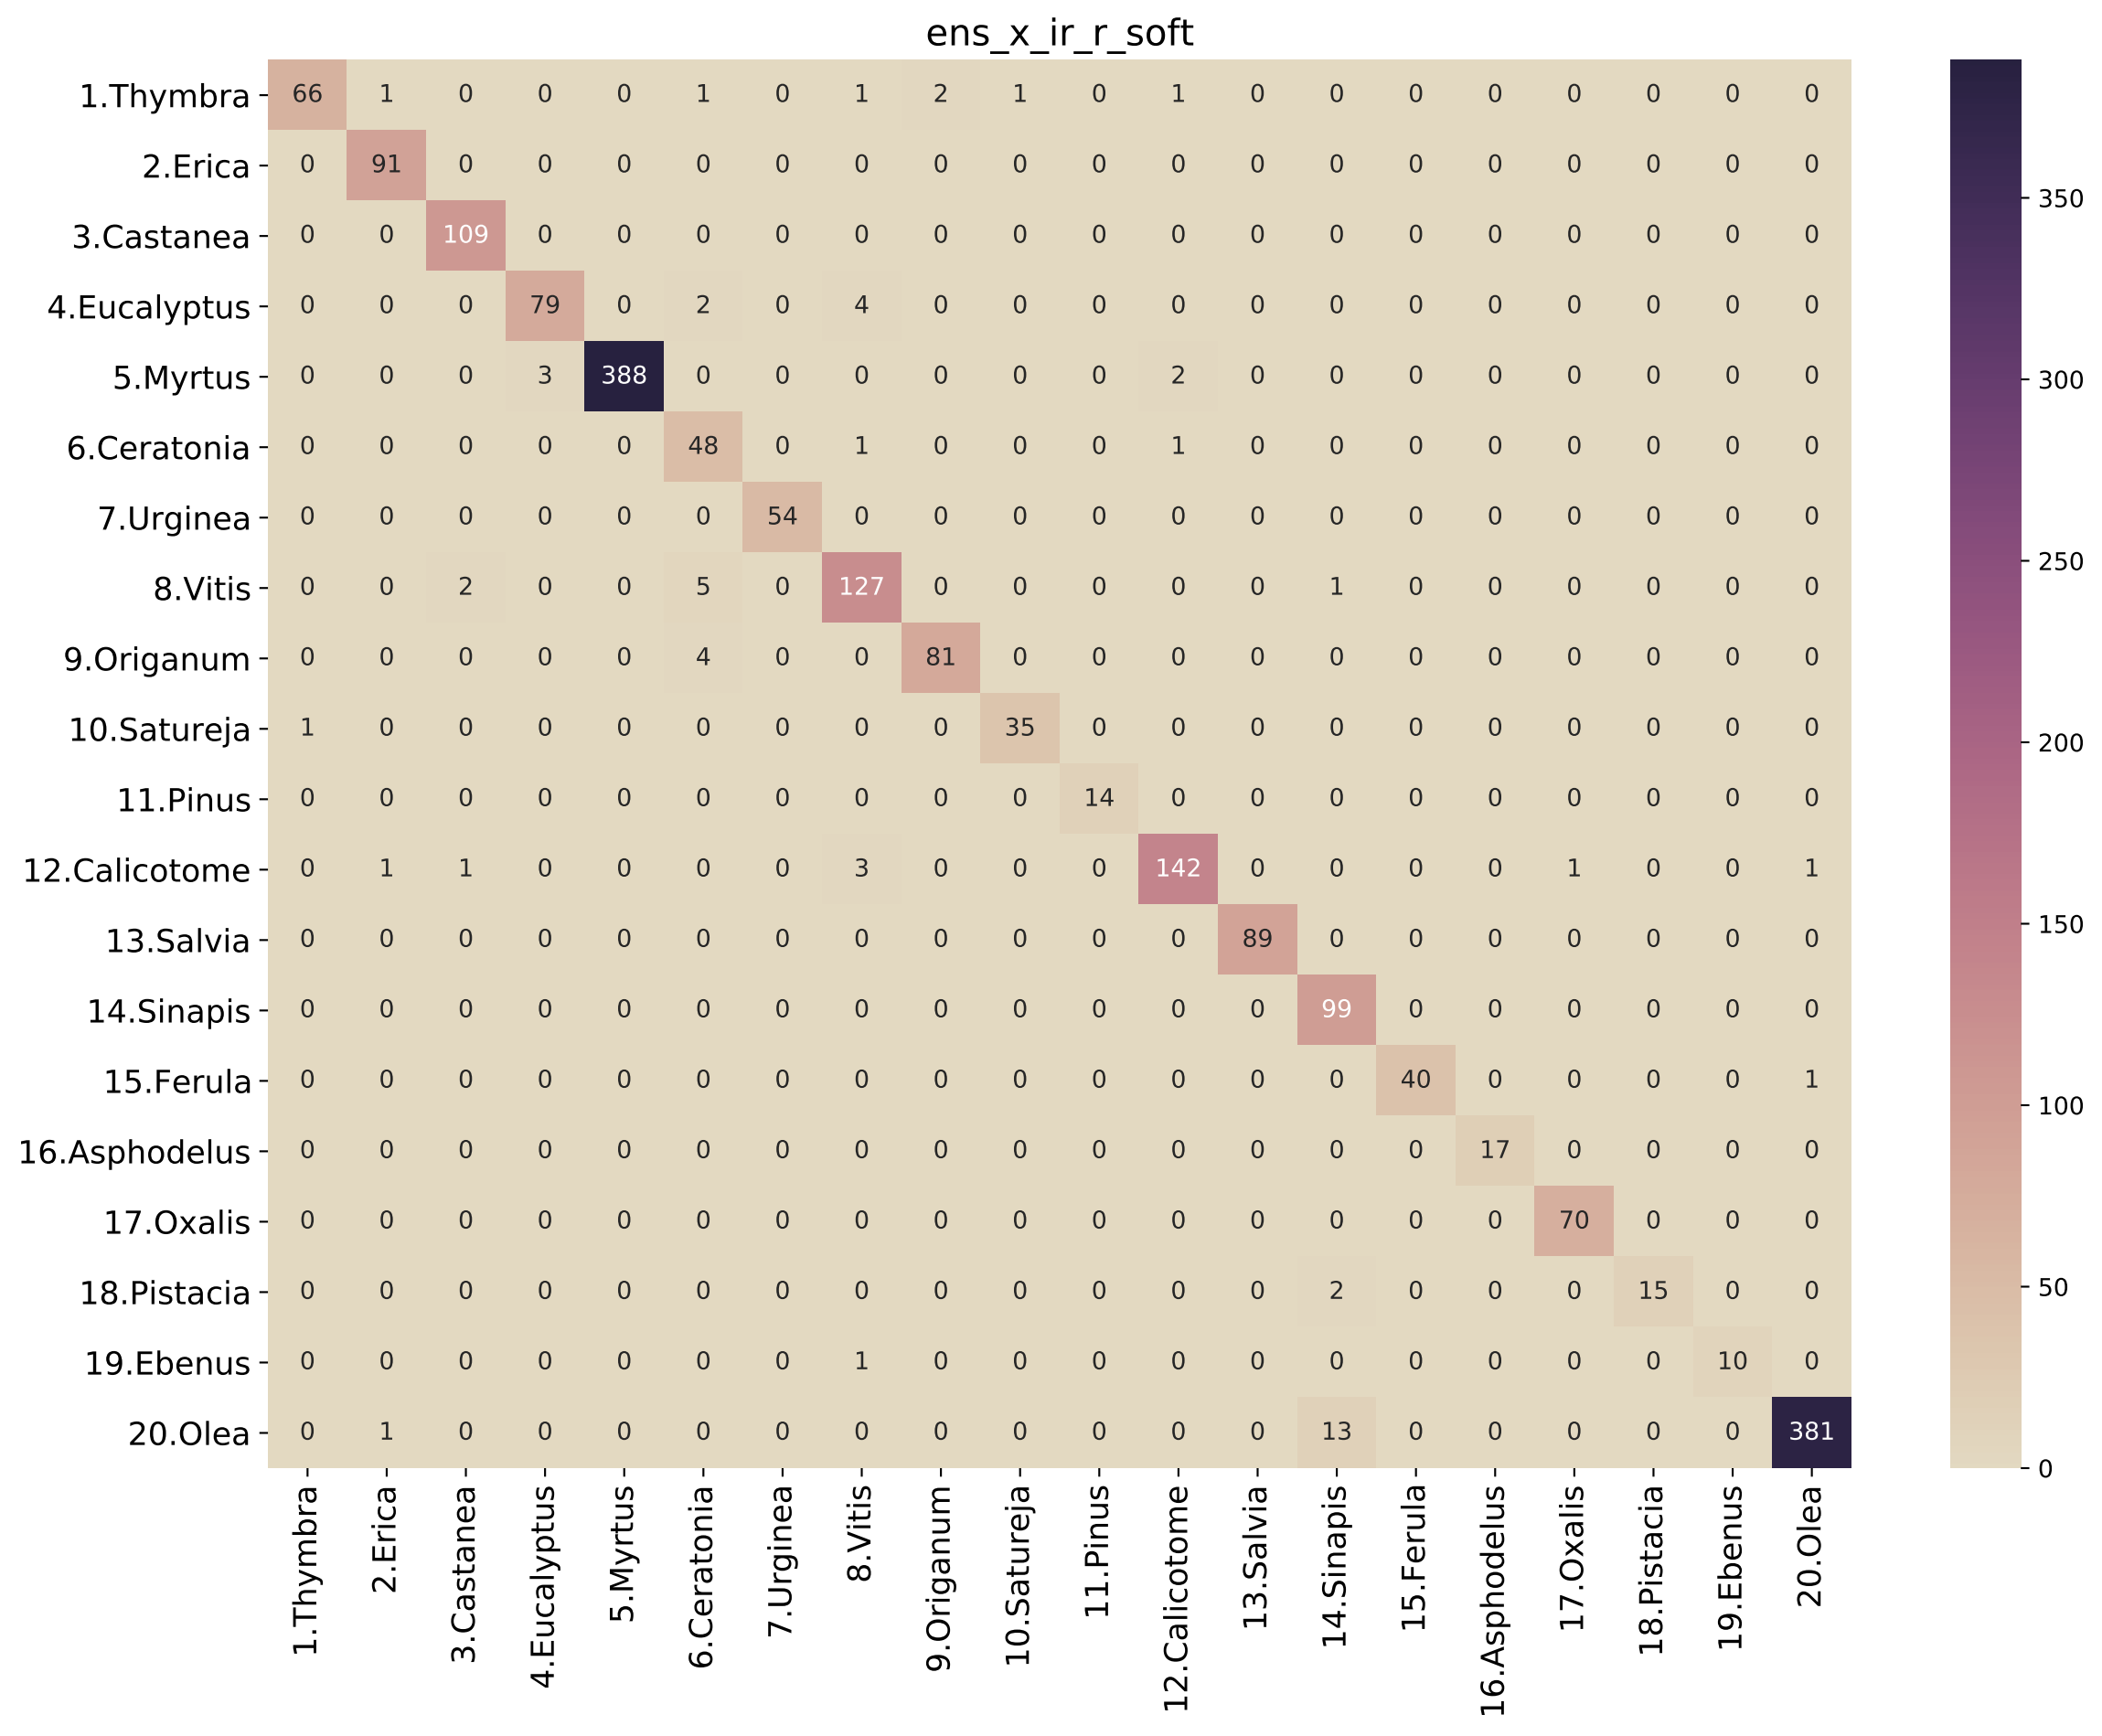

Supplement: s1 [file s1]

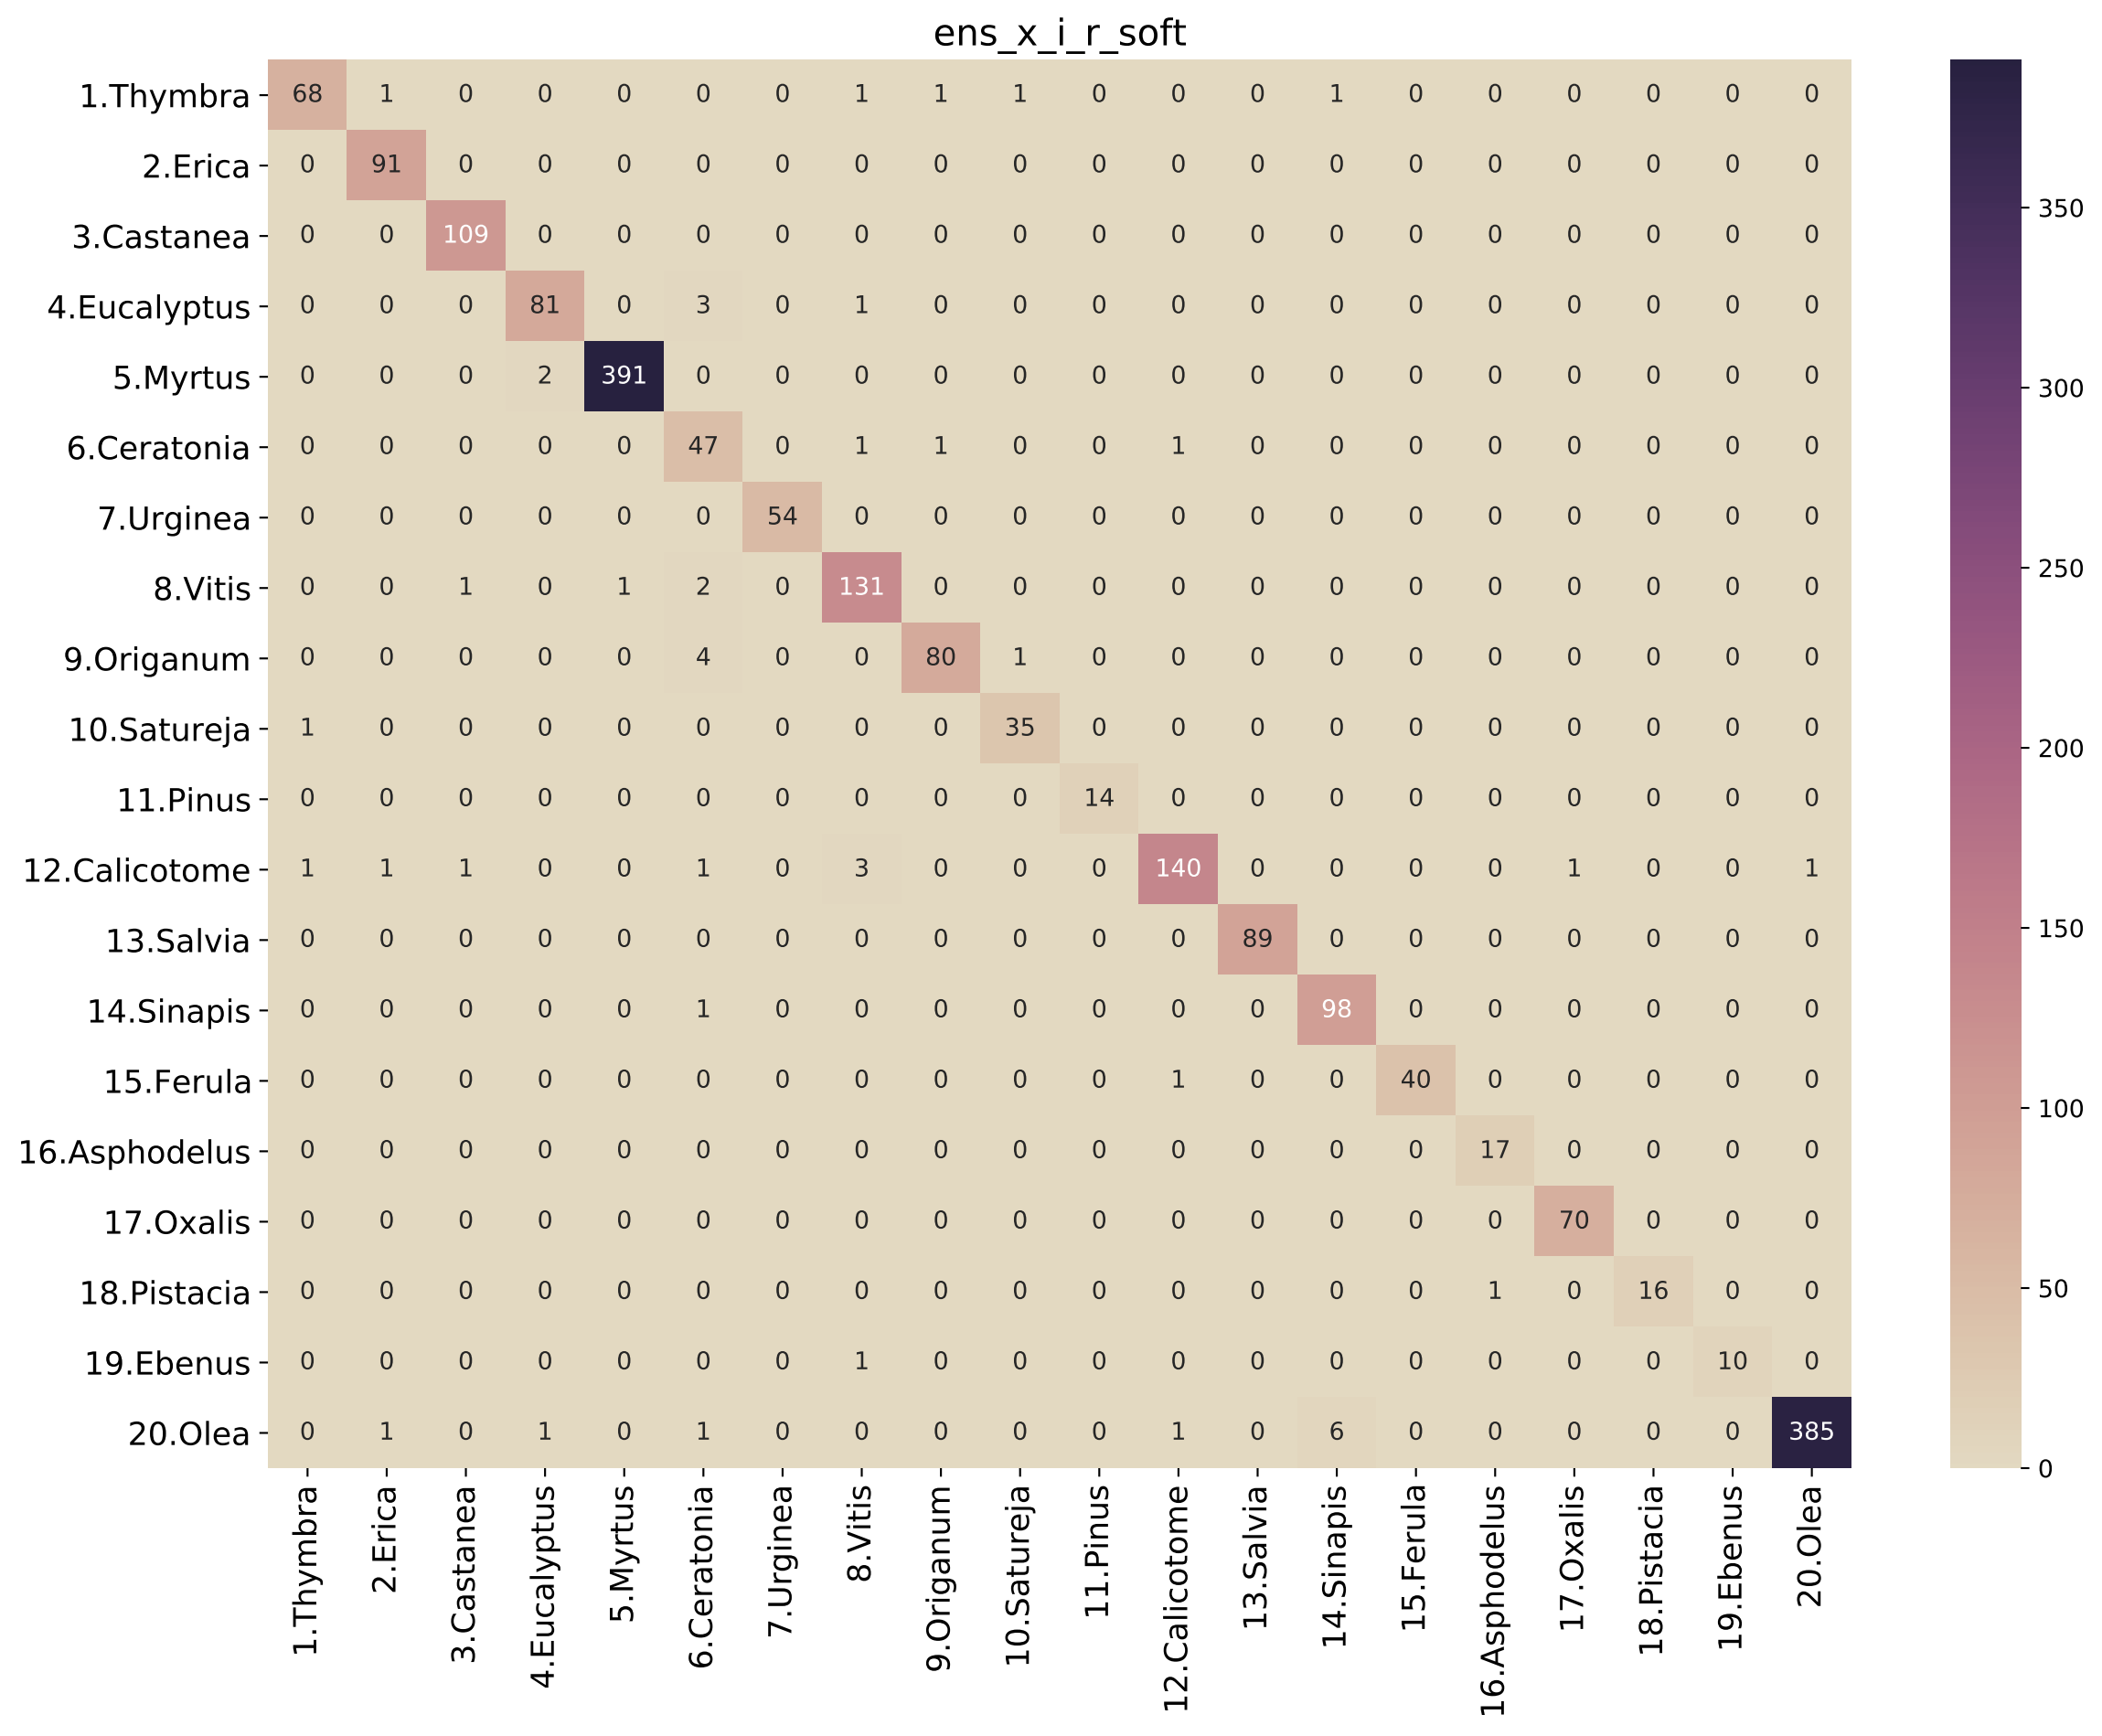

Supplement: s1 [file s1]

# xception

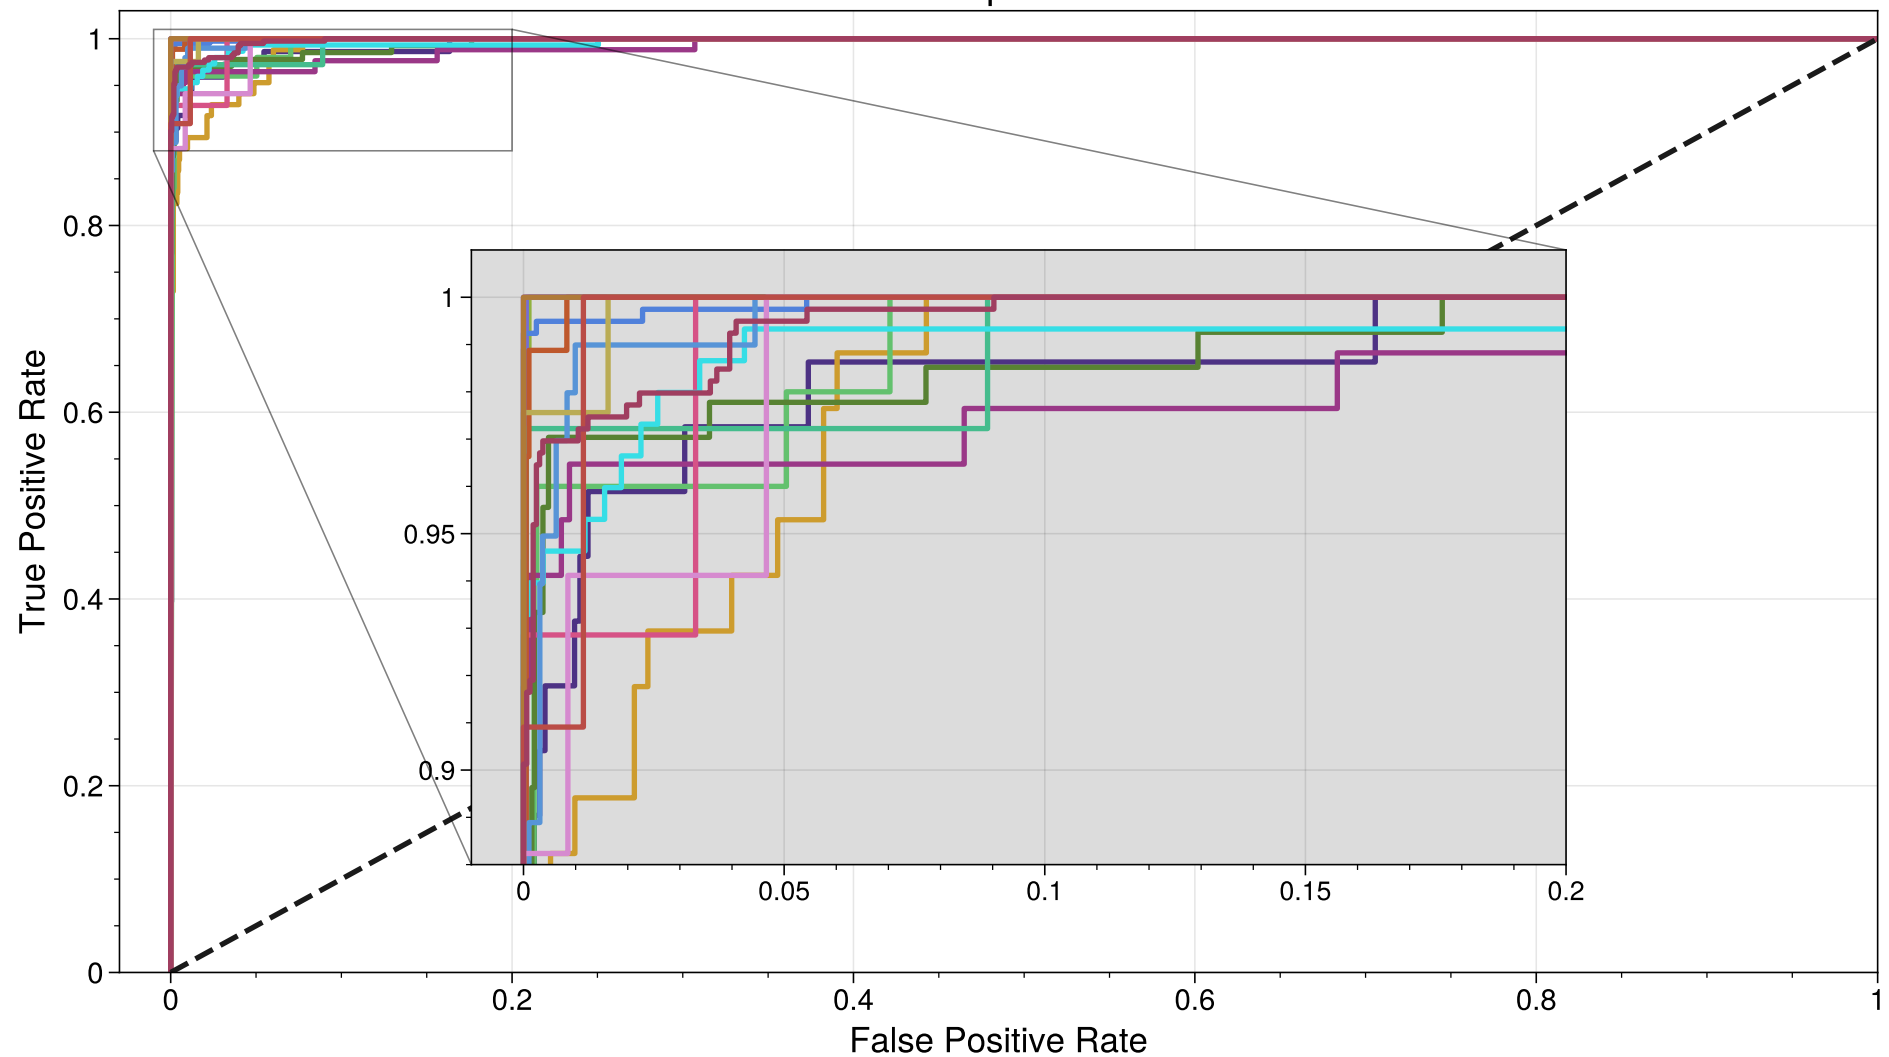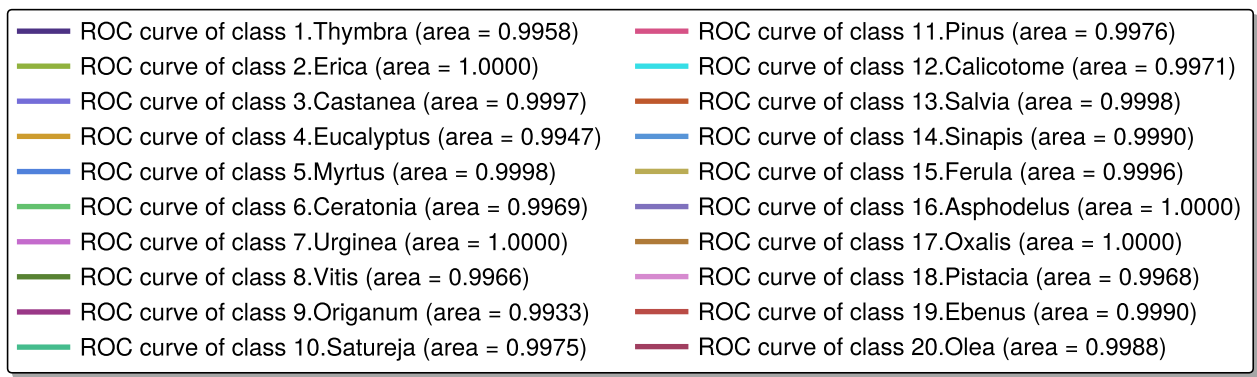

Supplement: s1 [file s1]

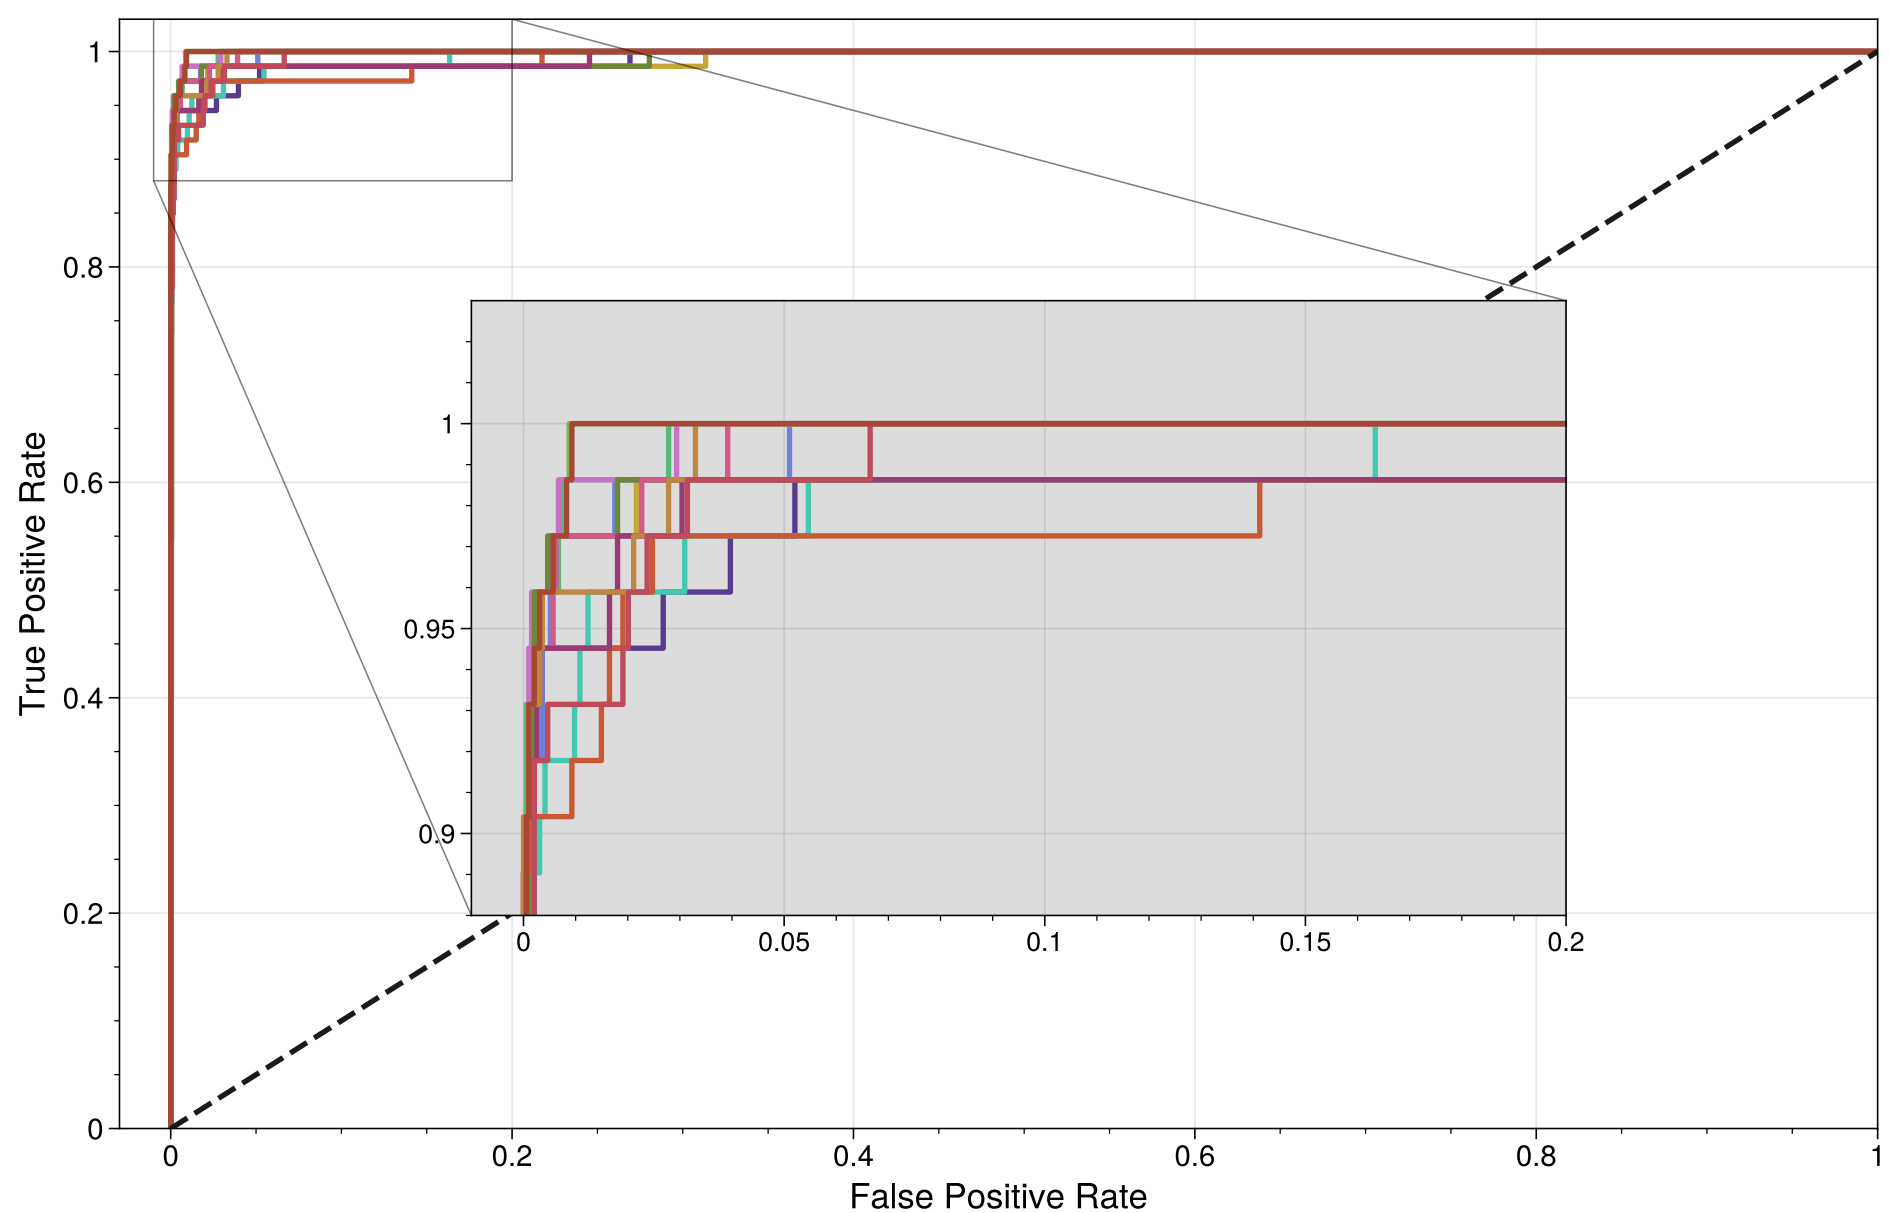

Supplement: s1 [file s1]

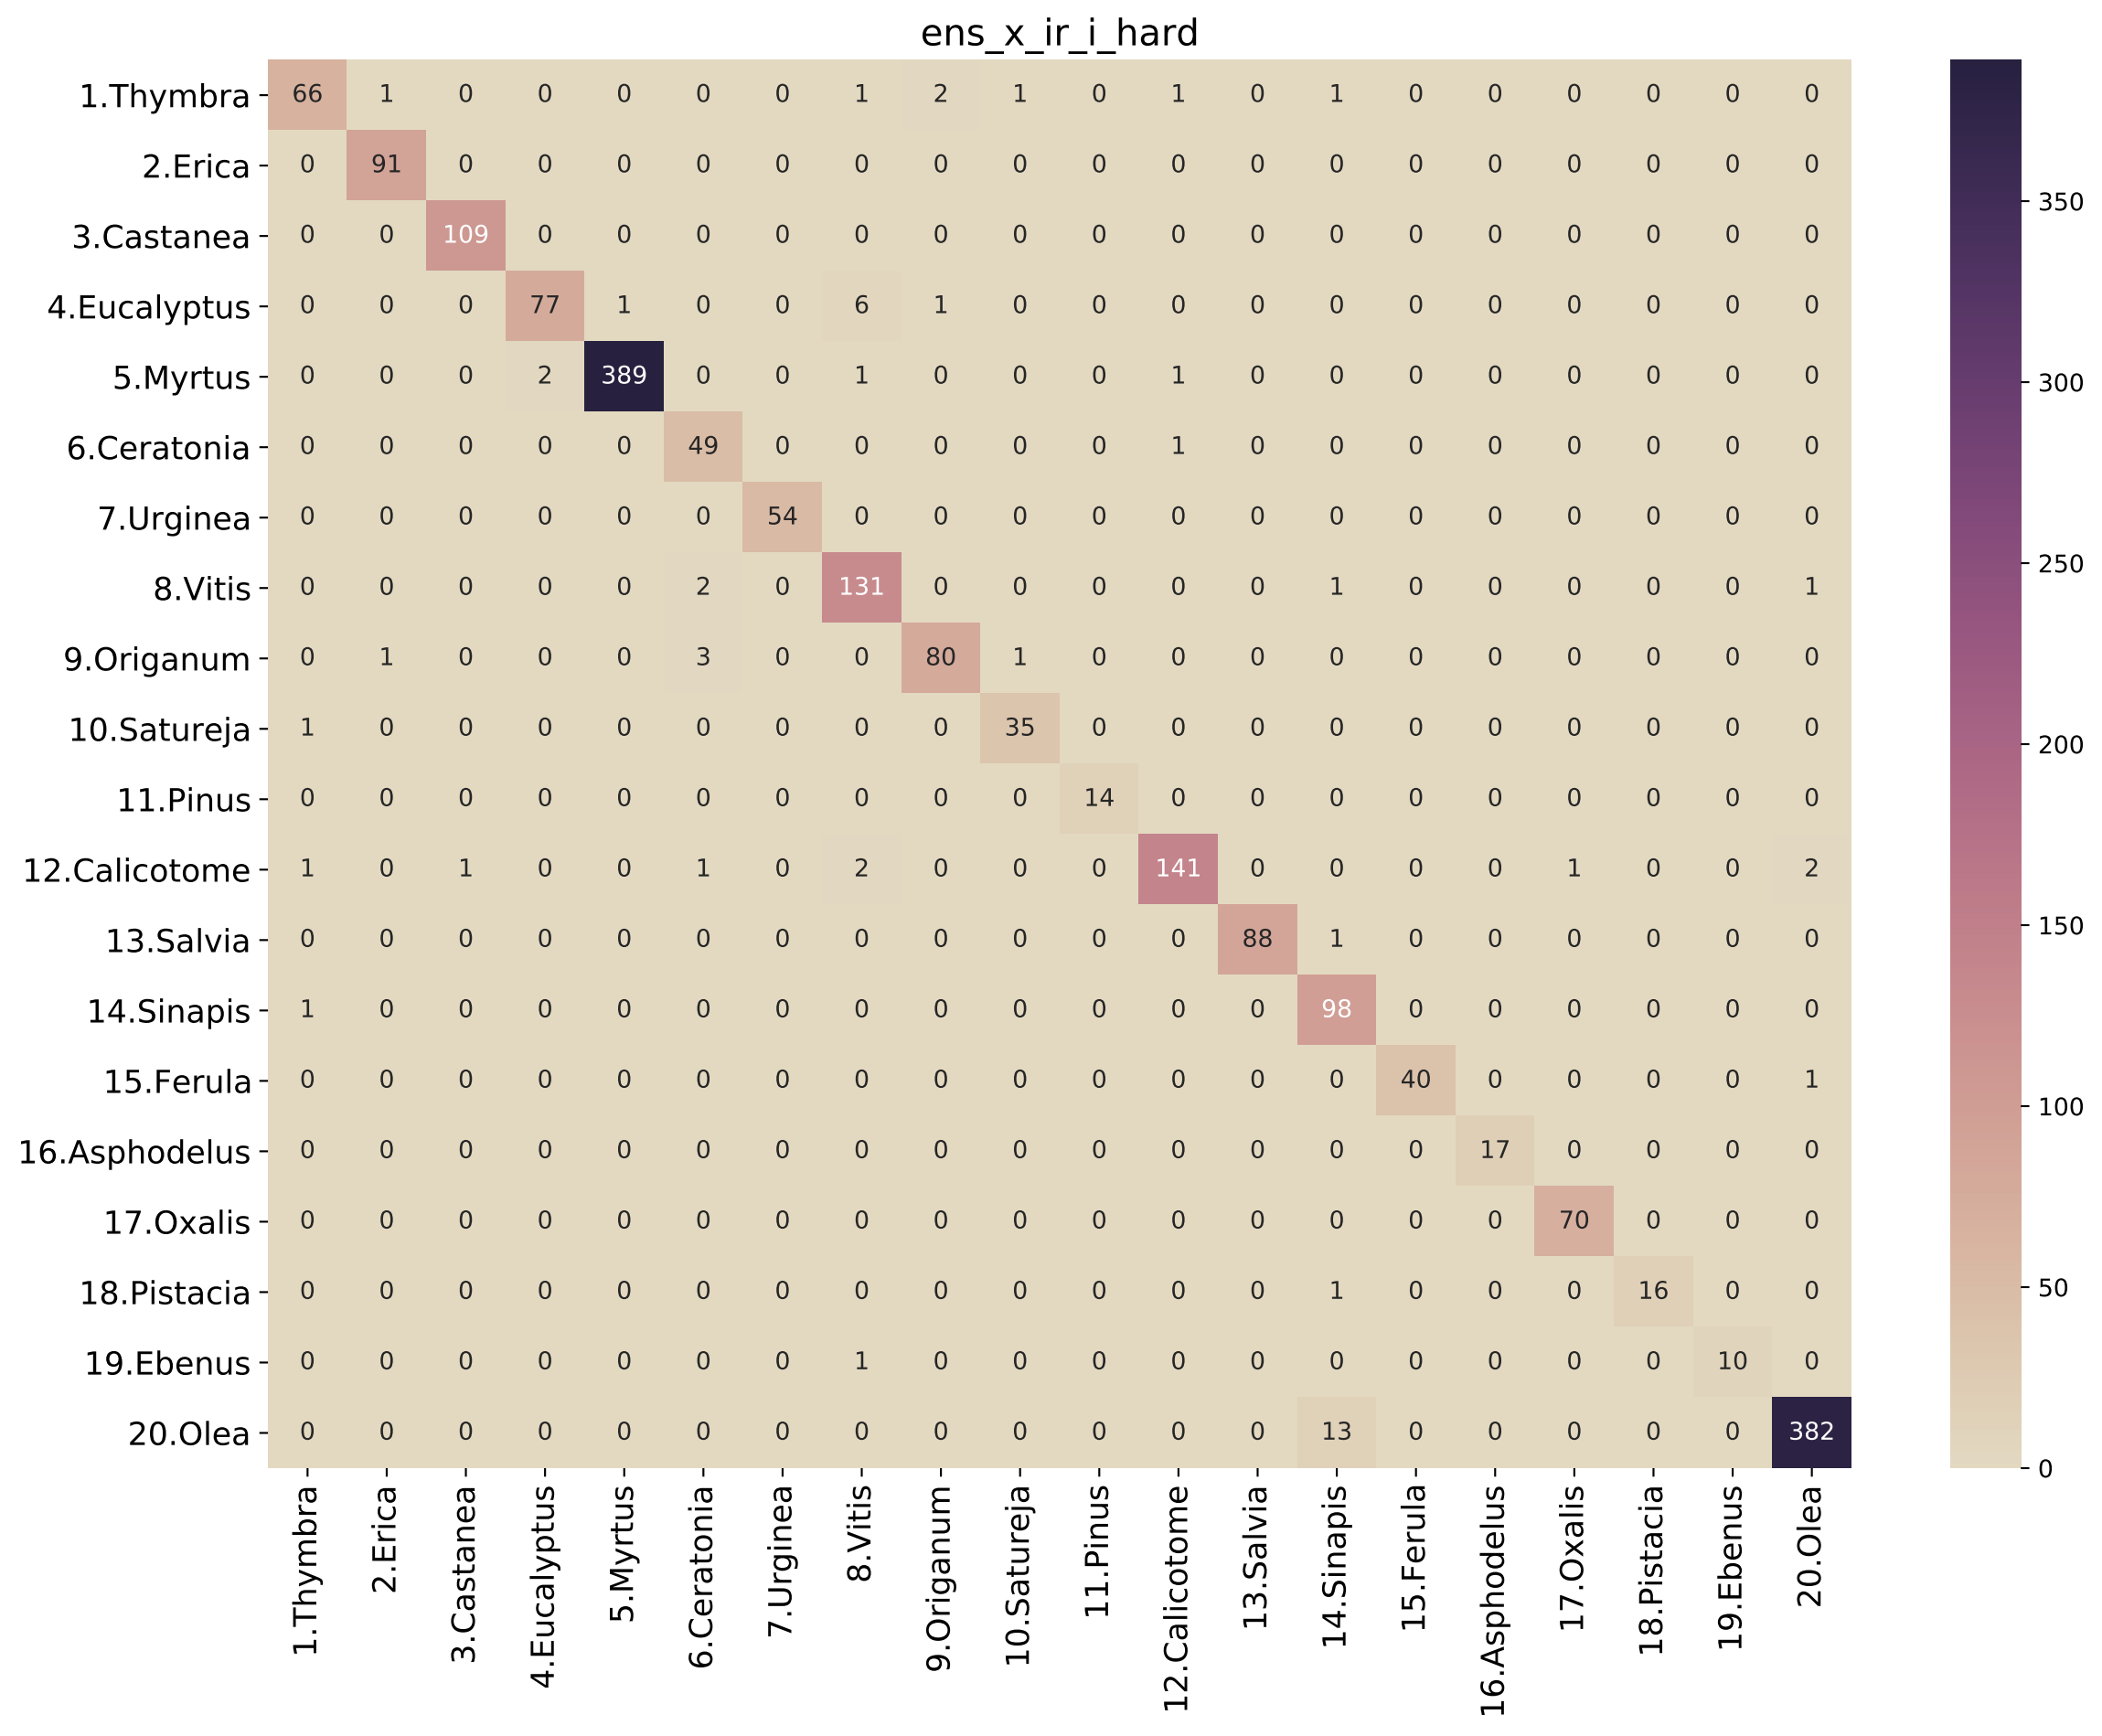

Supplement: s1 [file s1]

ens\_x\_ir\_soft

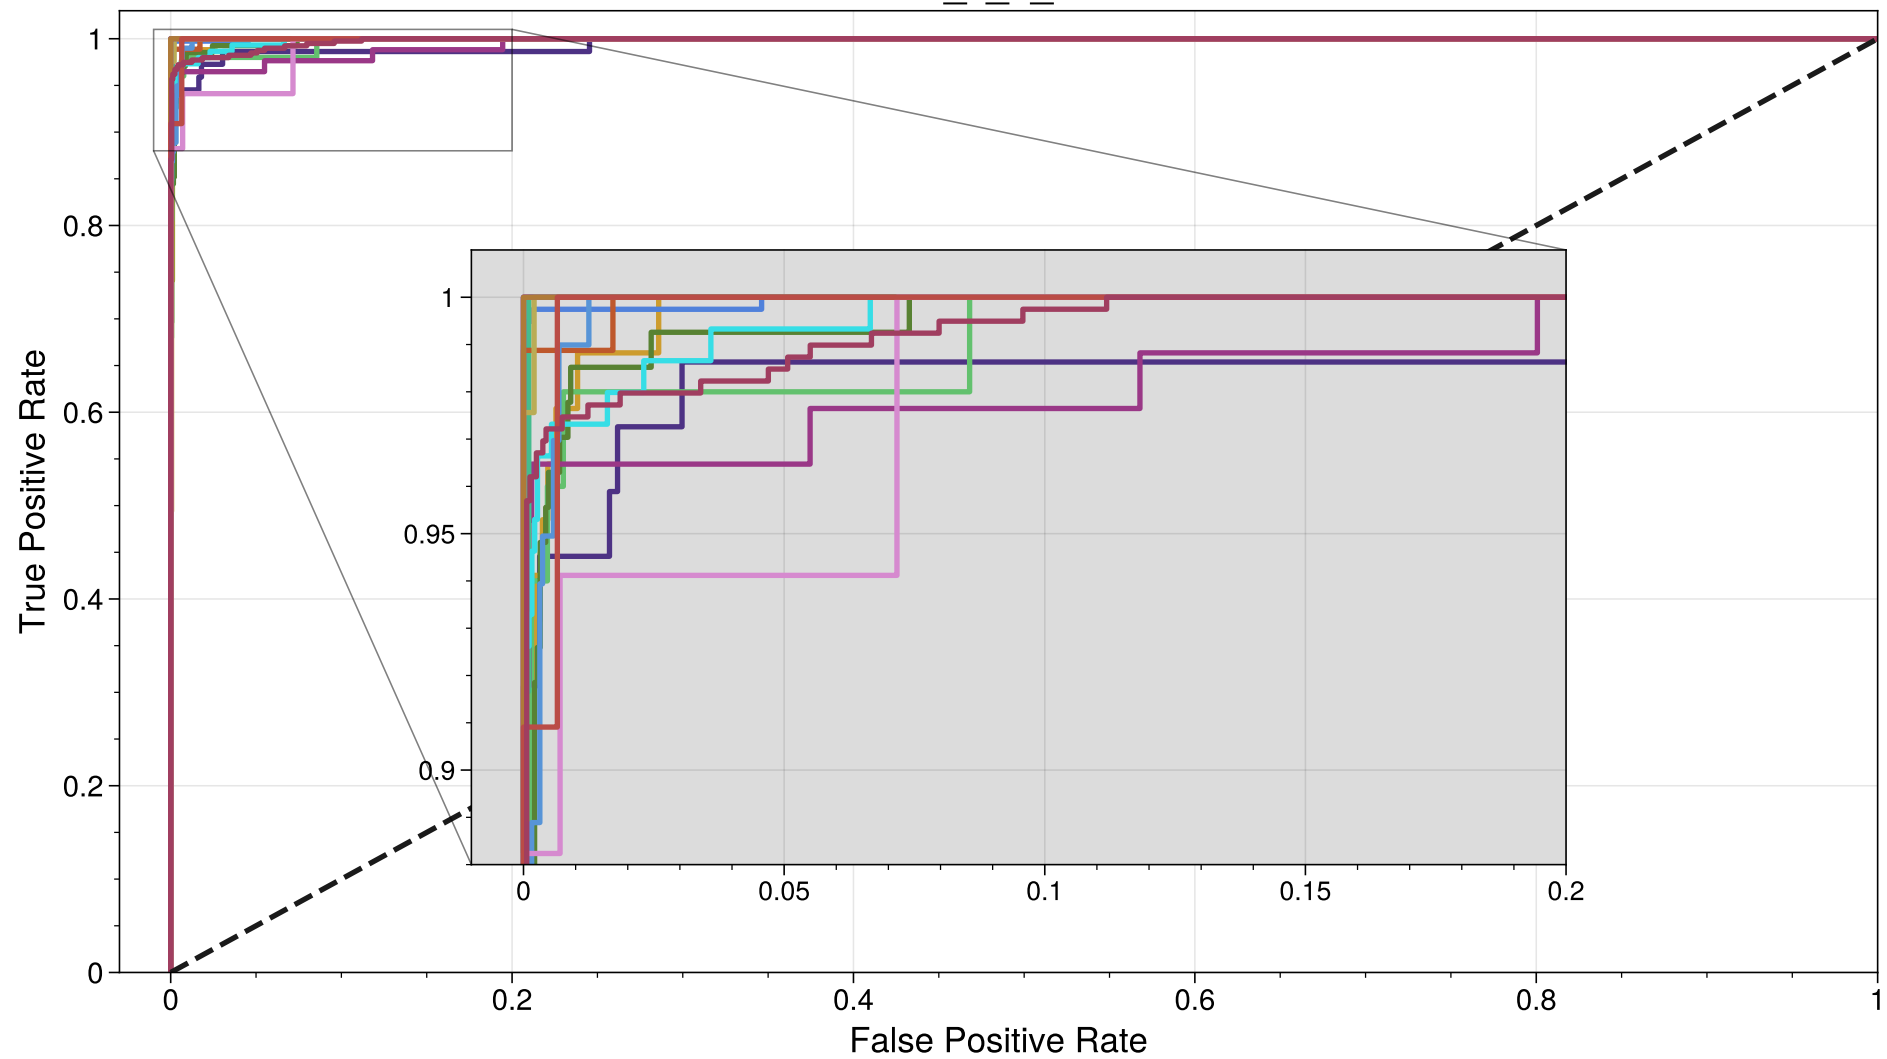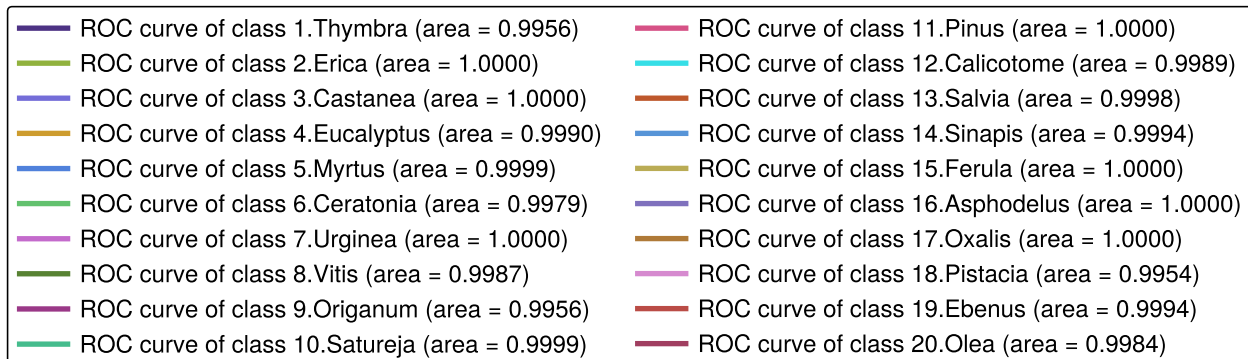

Supplement: s1 [file s1]

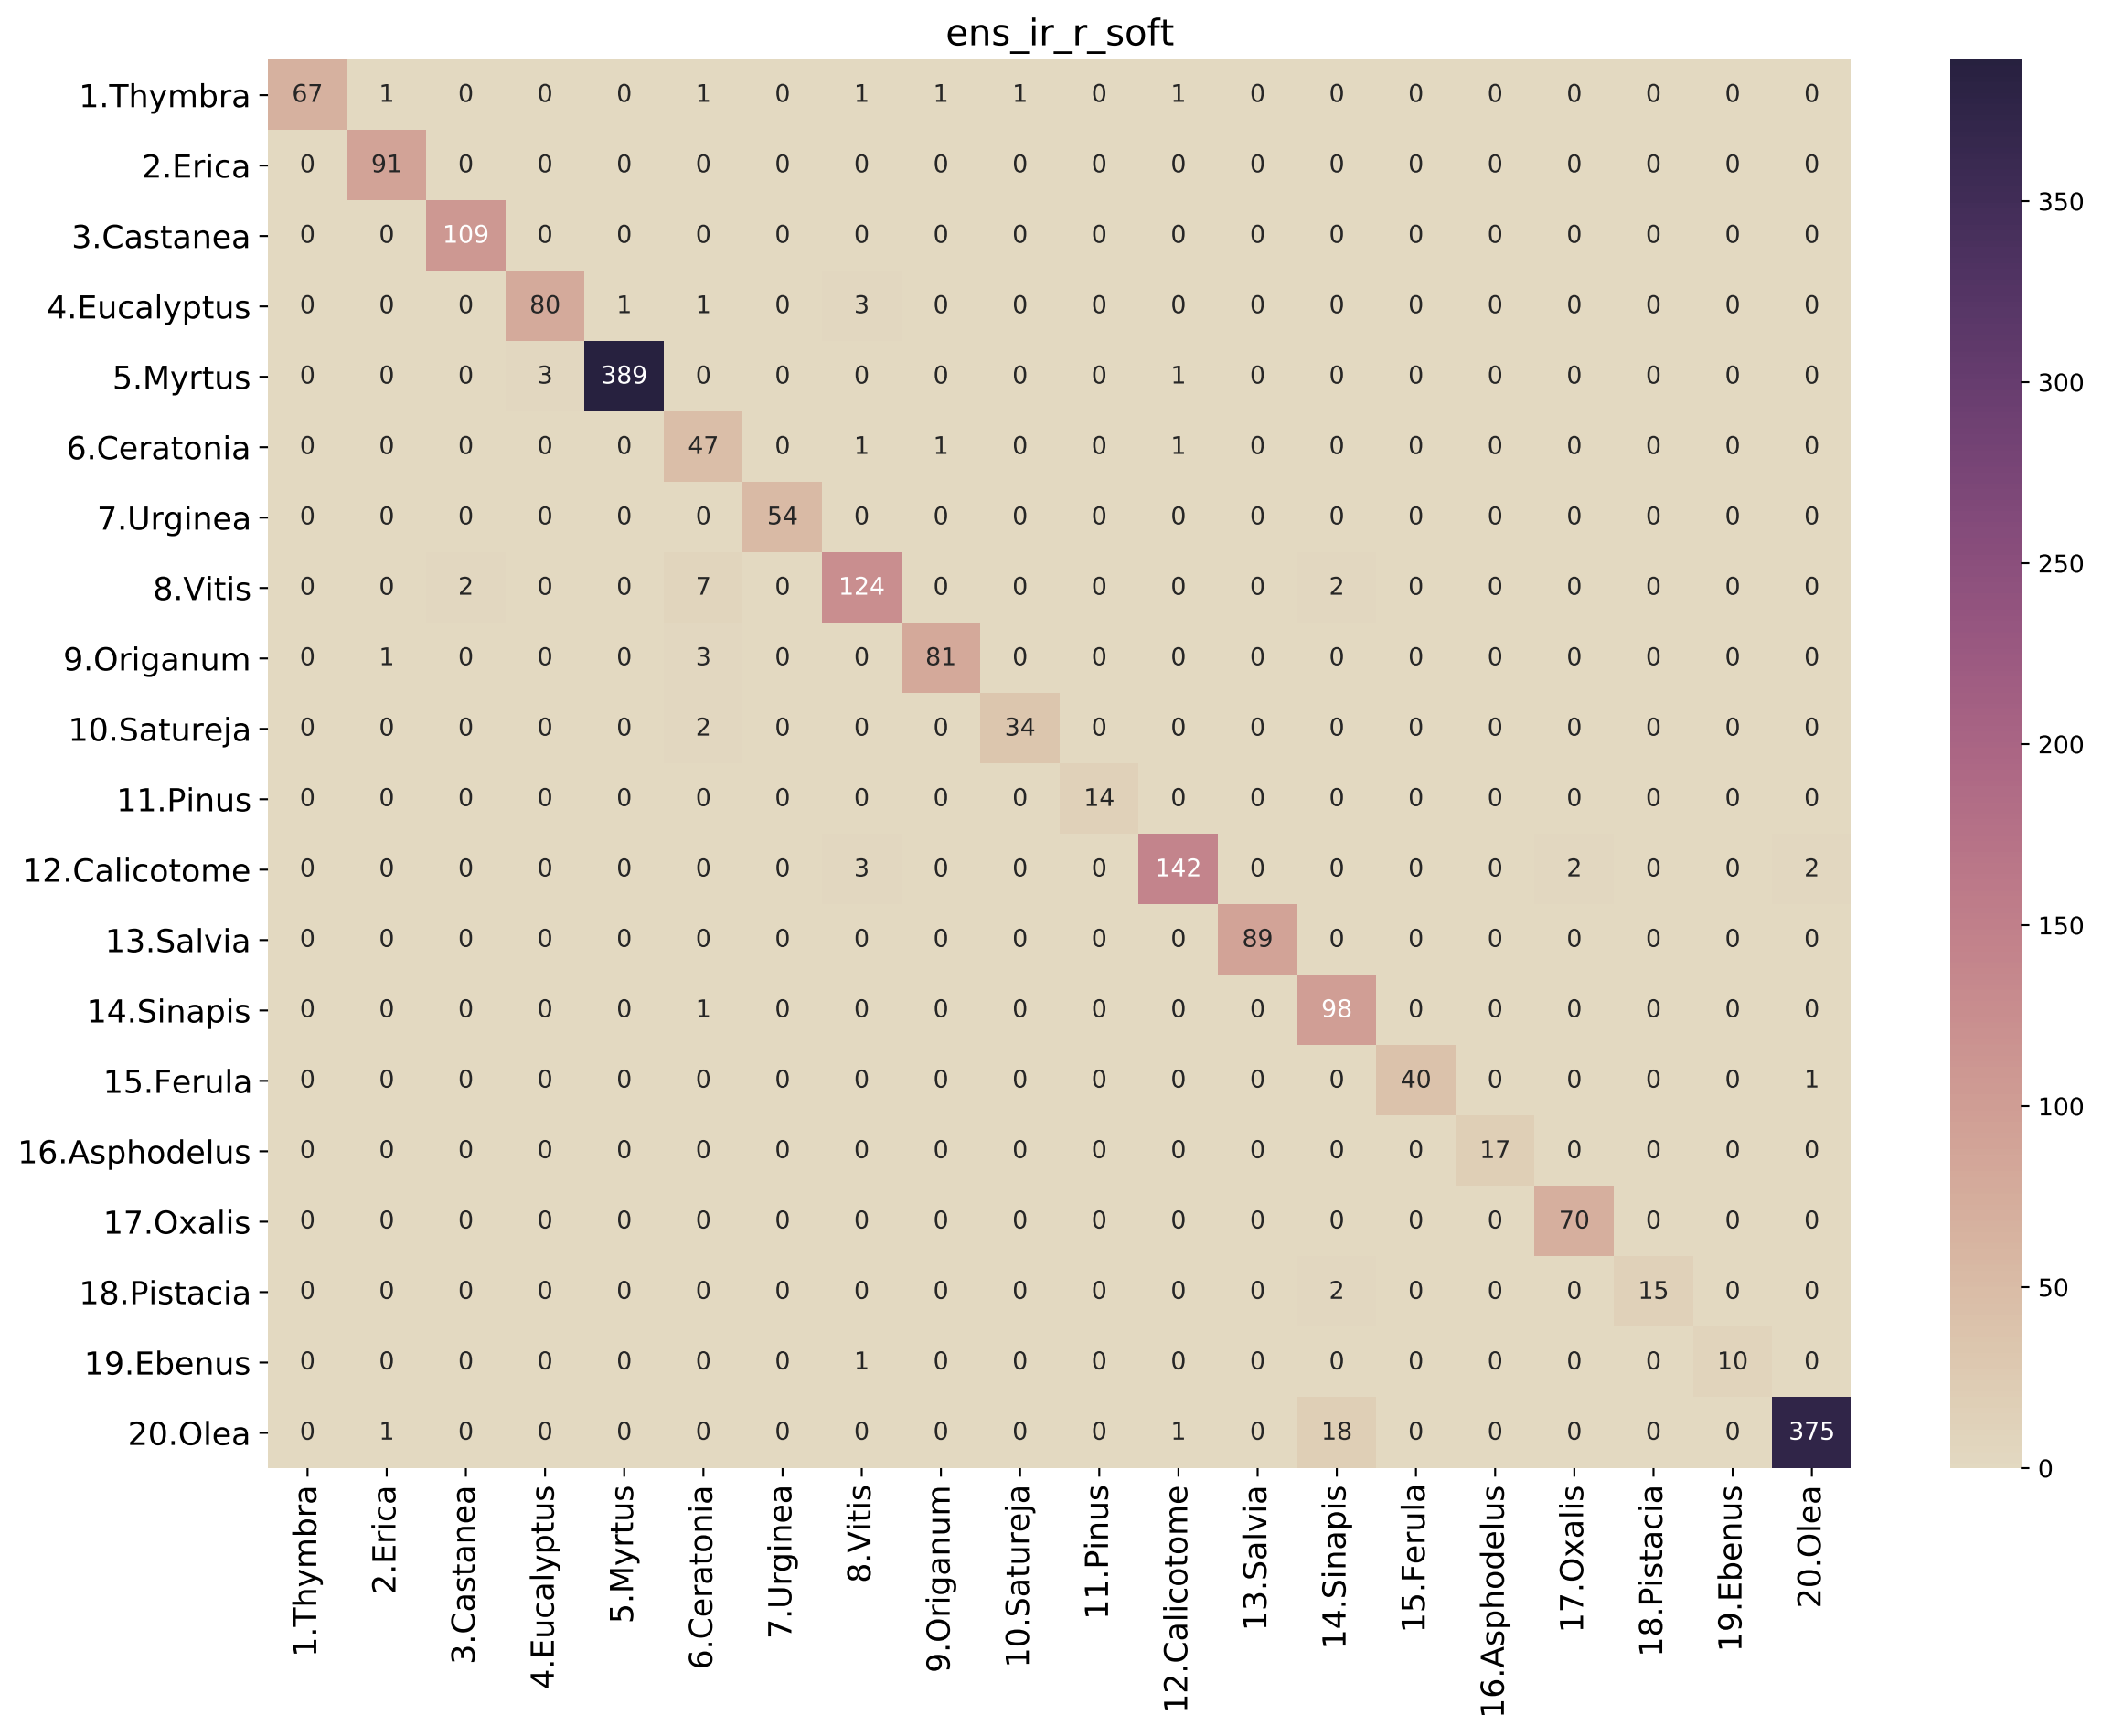

Supplement: s1 [file s1]

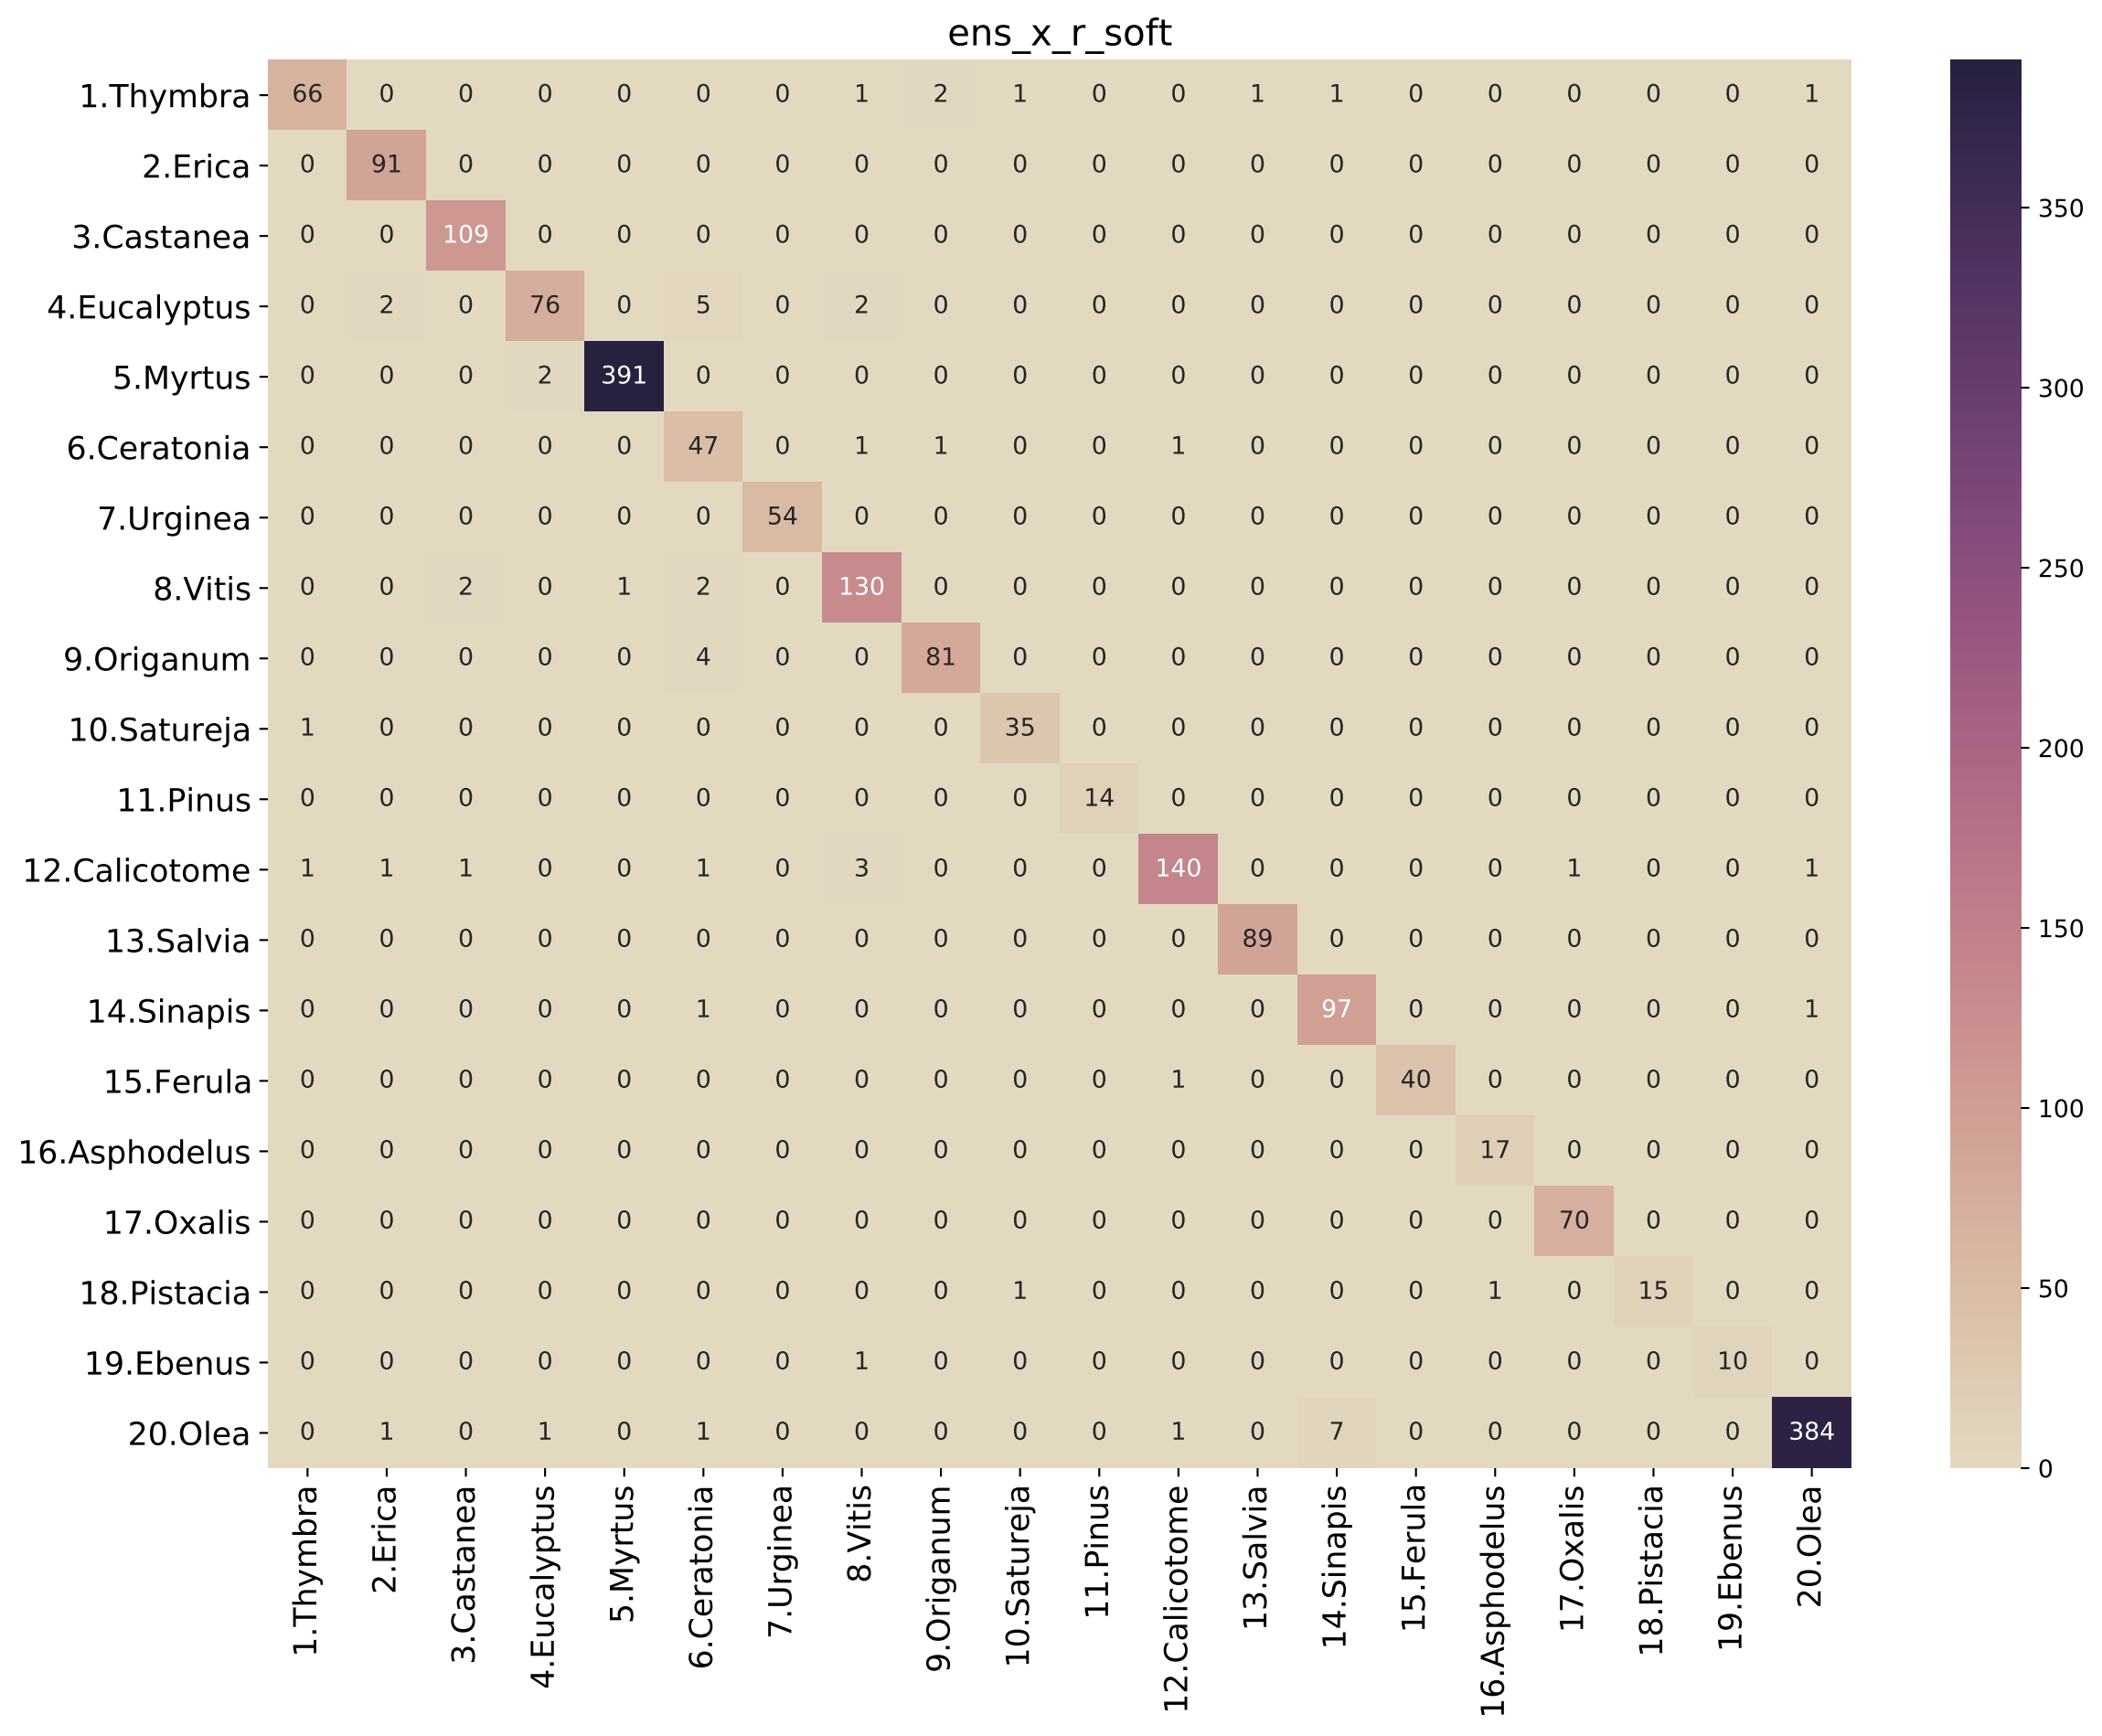

Supplement: s1 [file s1]

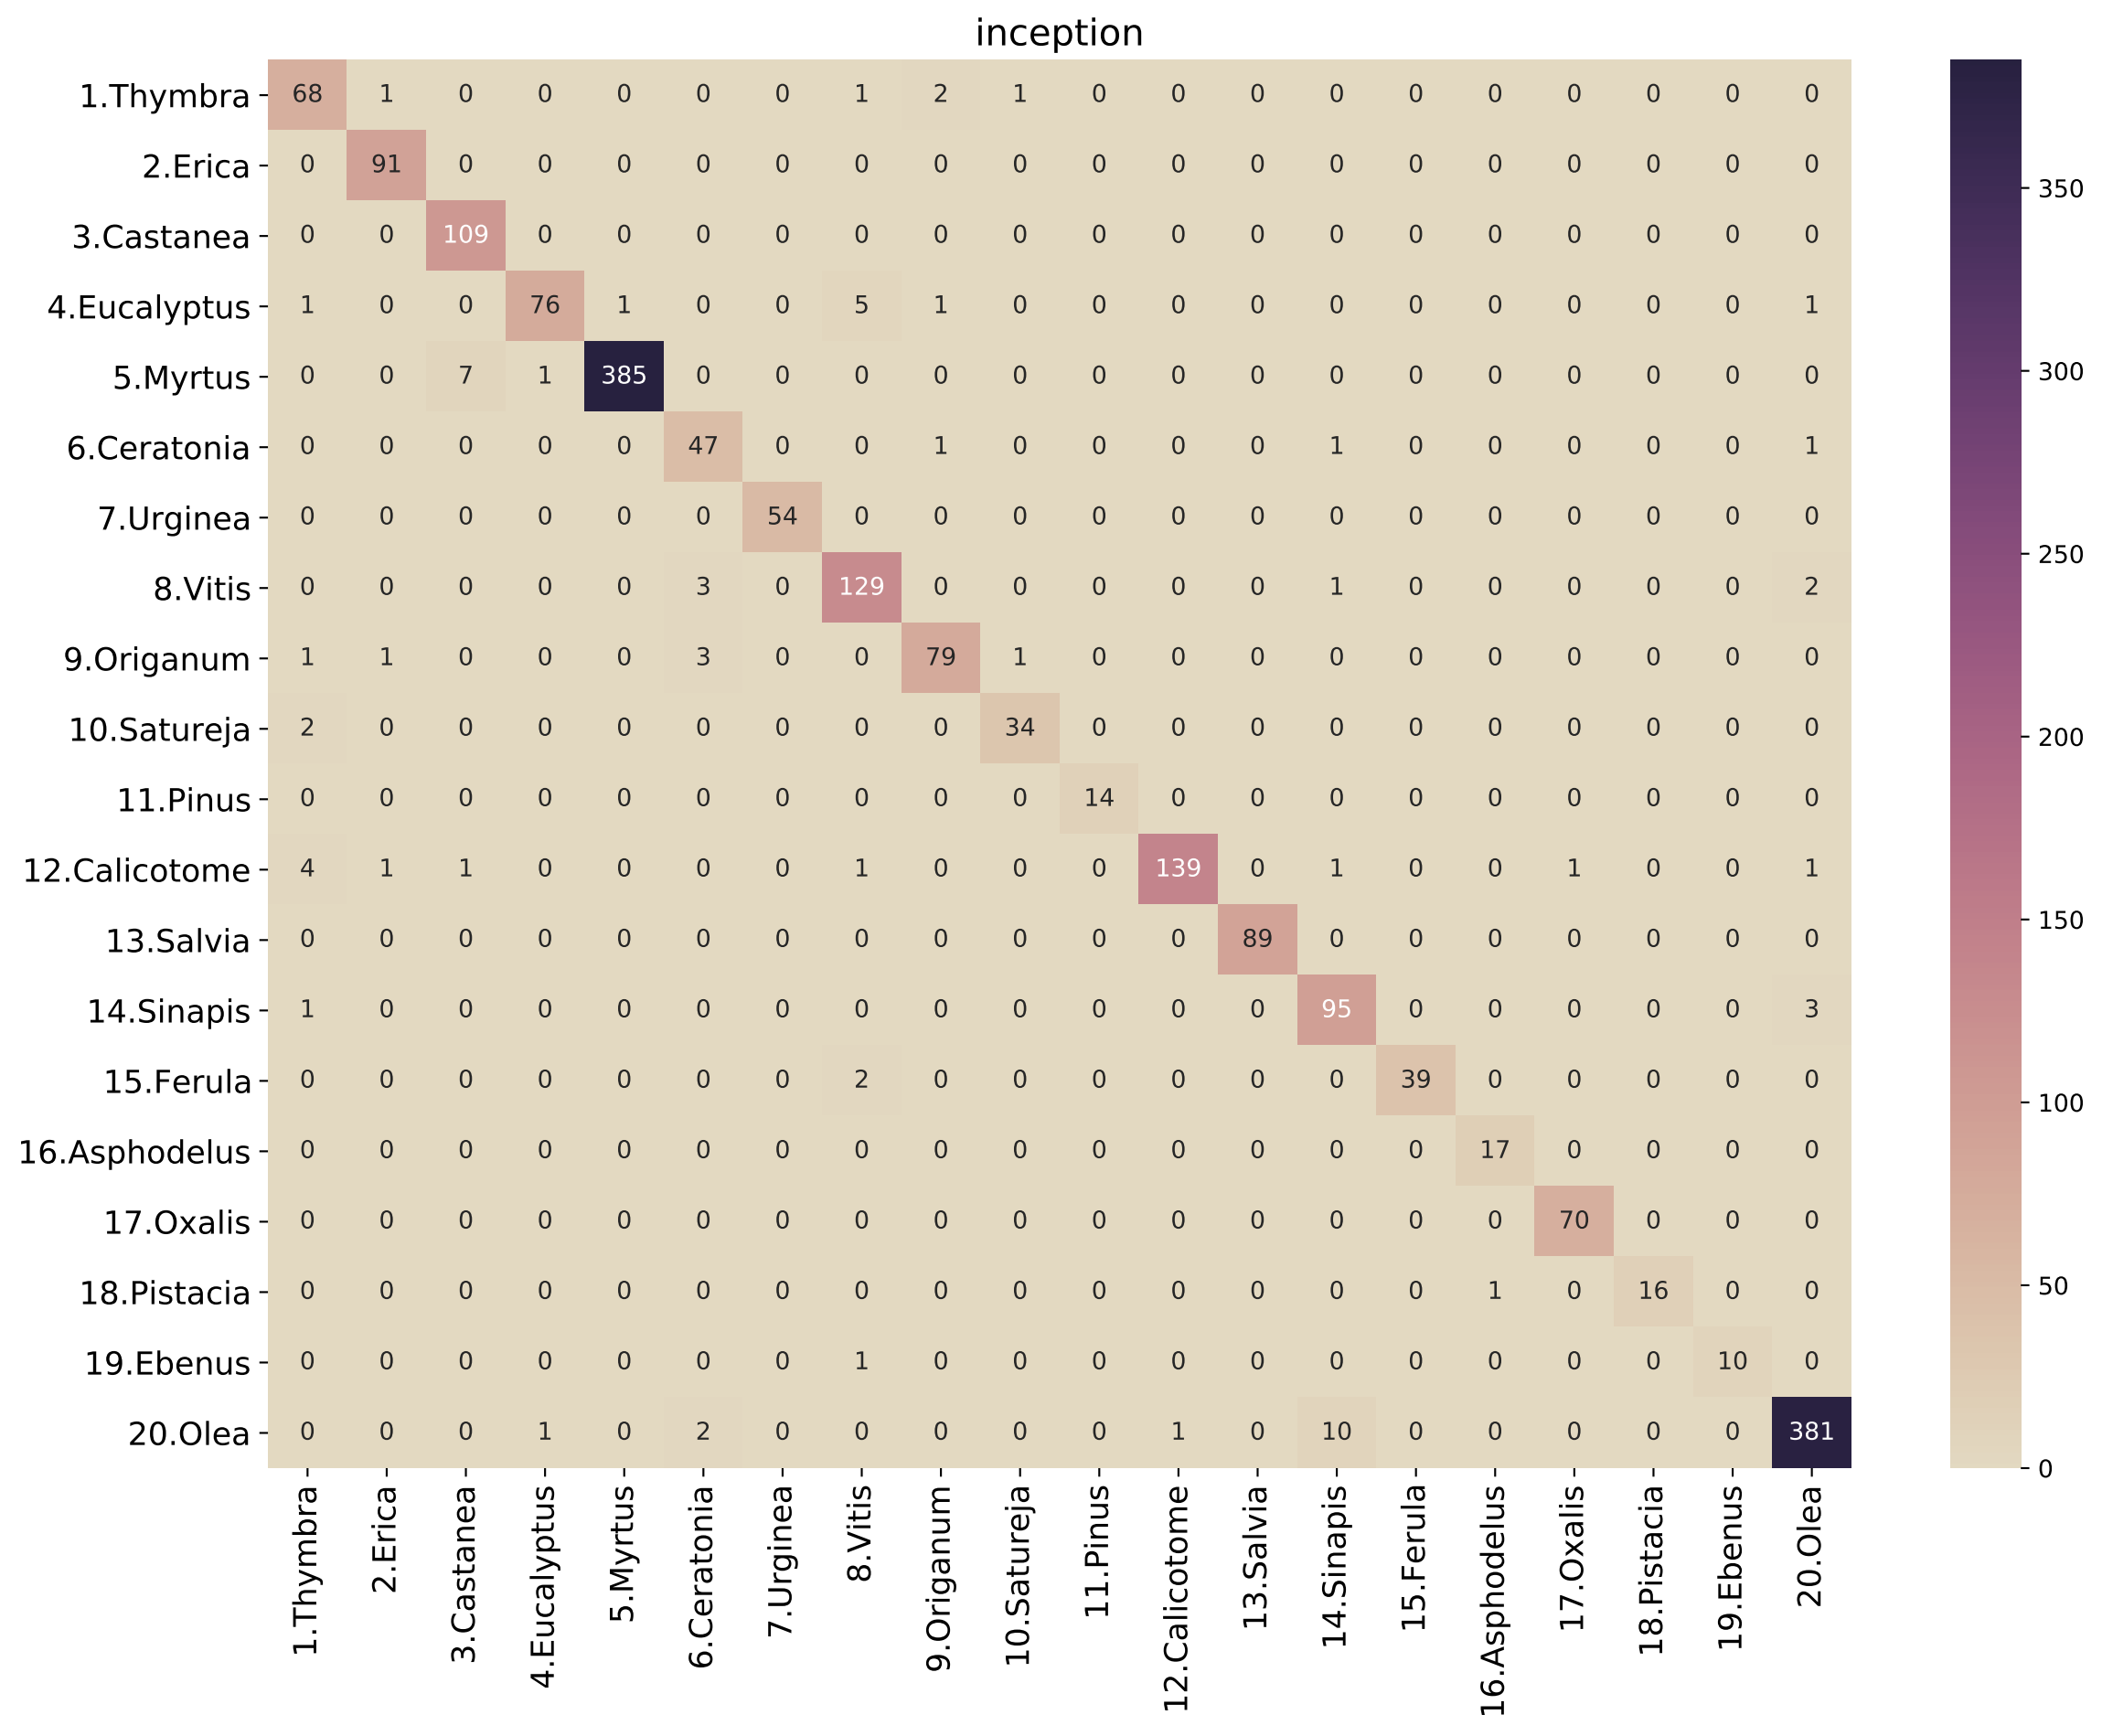

Supplement: s1 [file s1]

ens\_x\_ir\_r\_soft

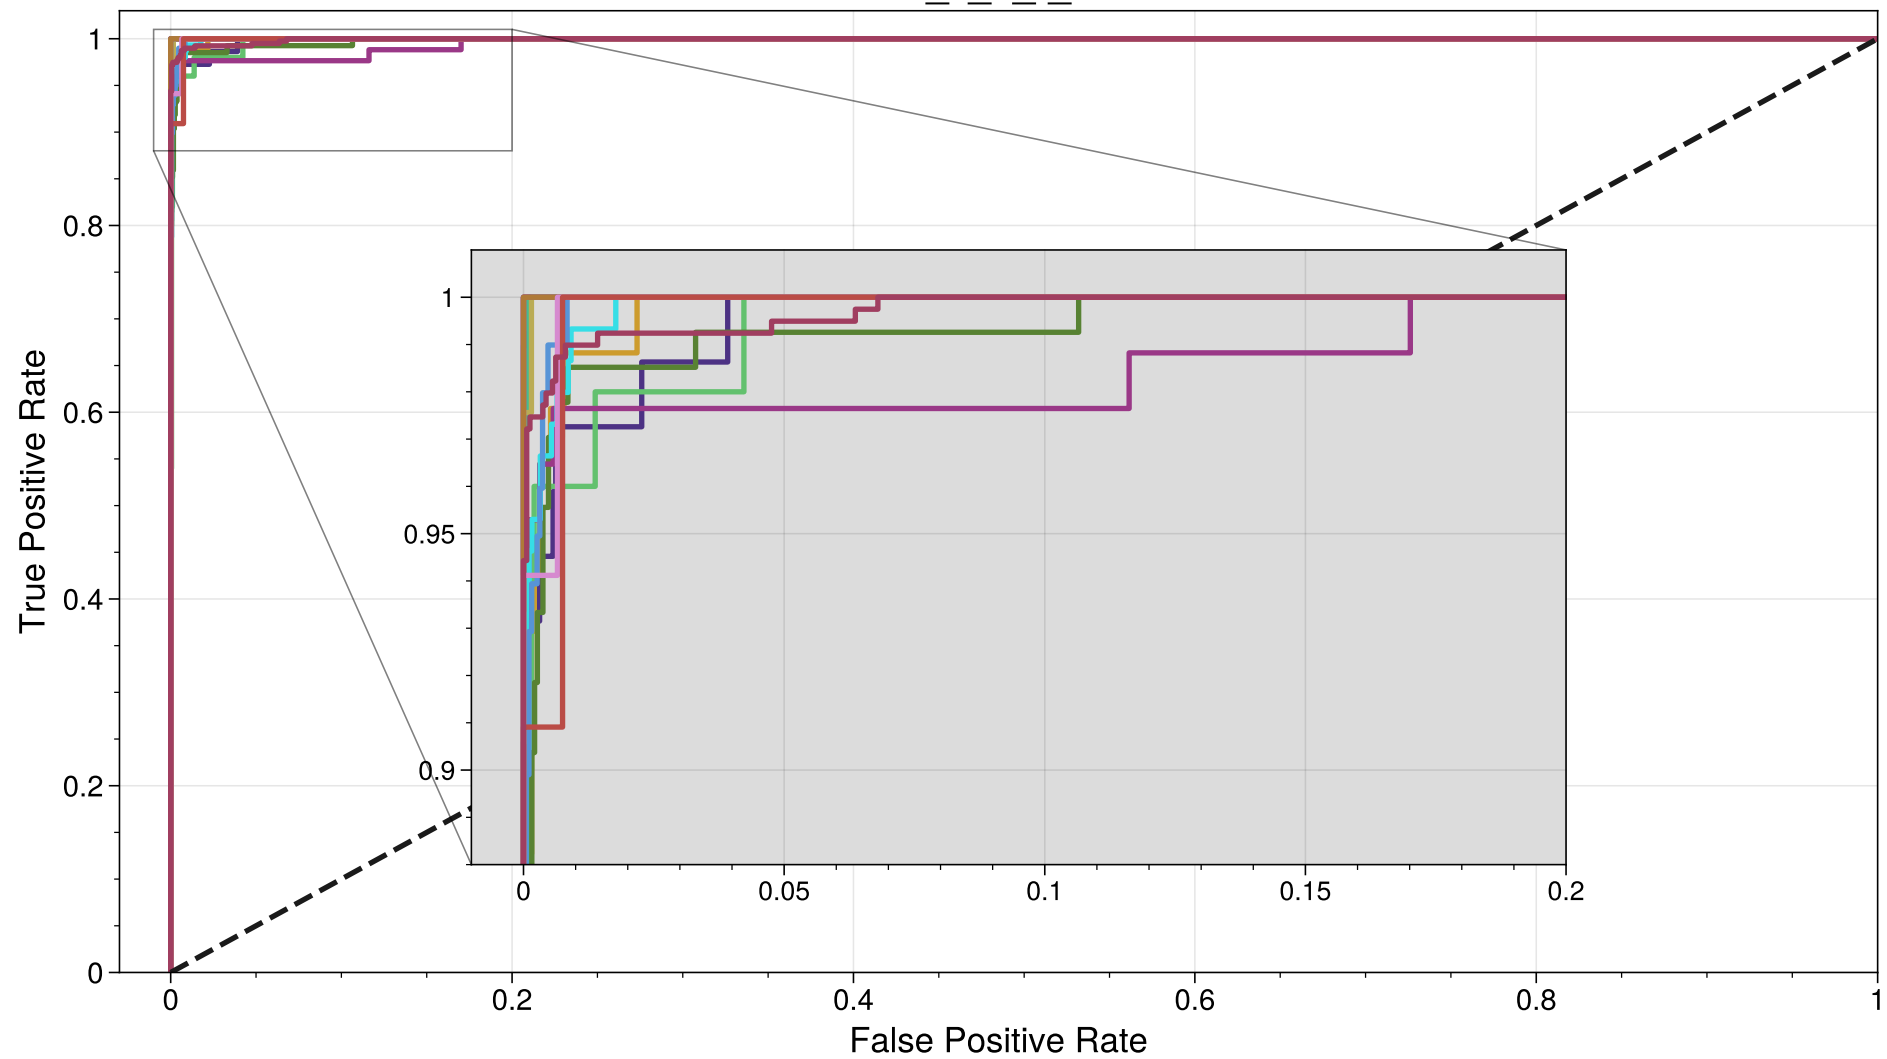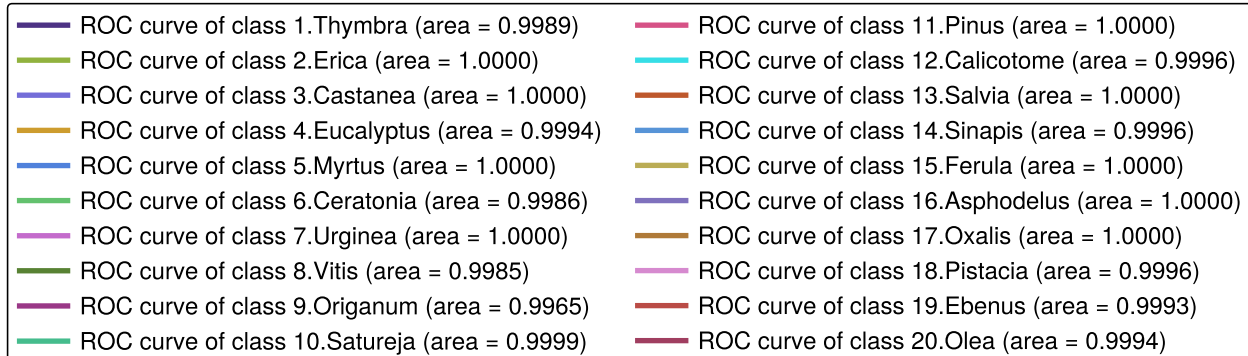

Supplement: s1 [file s1]

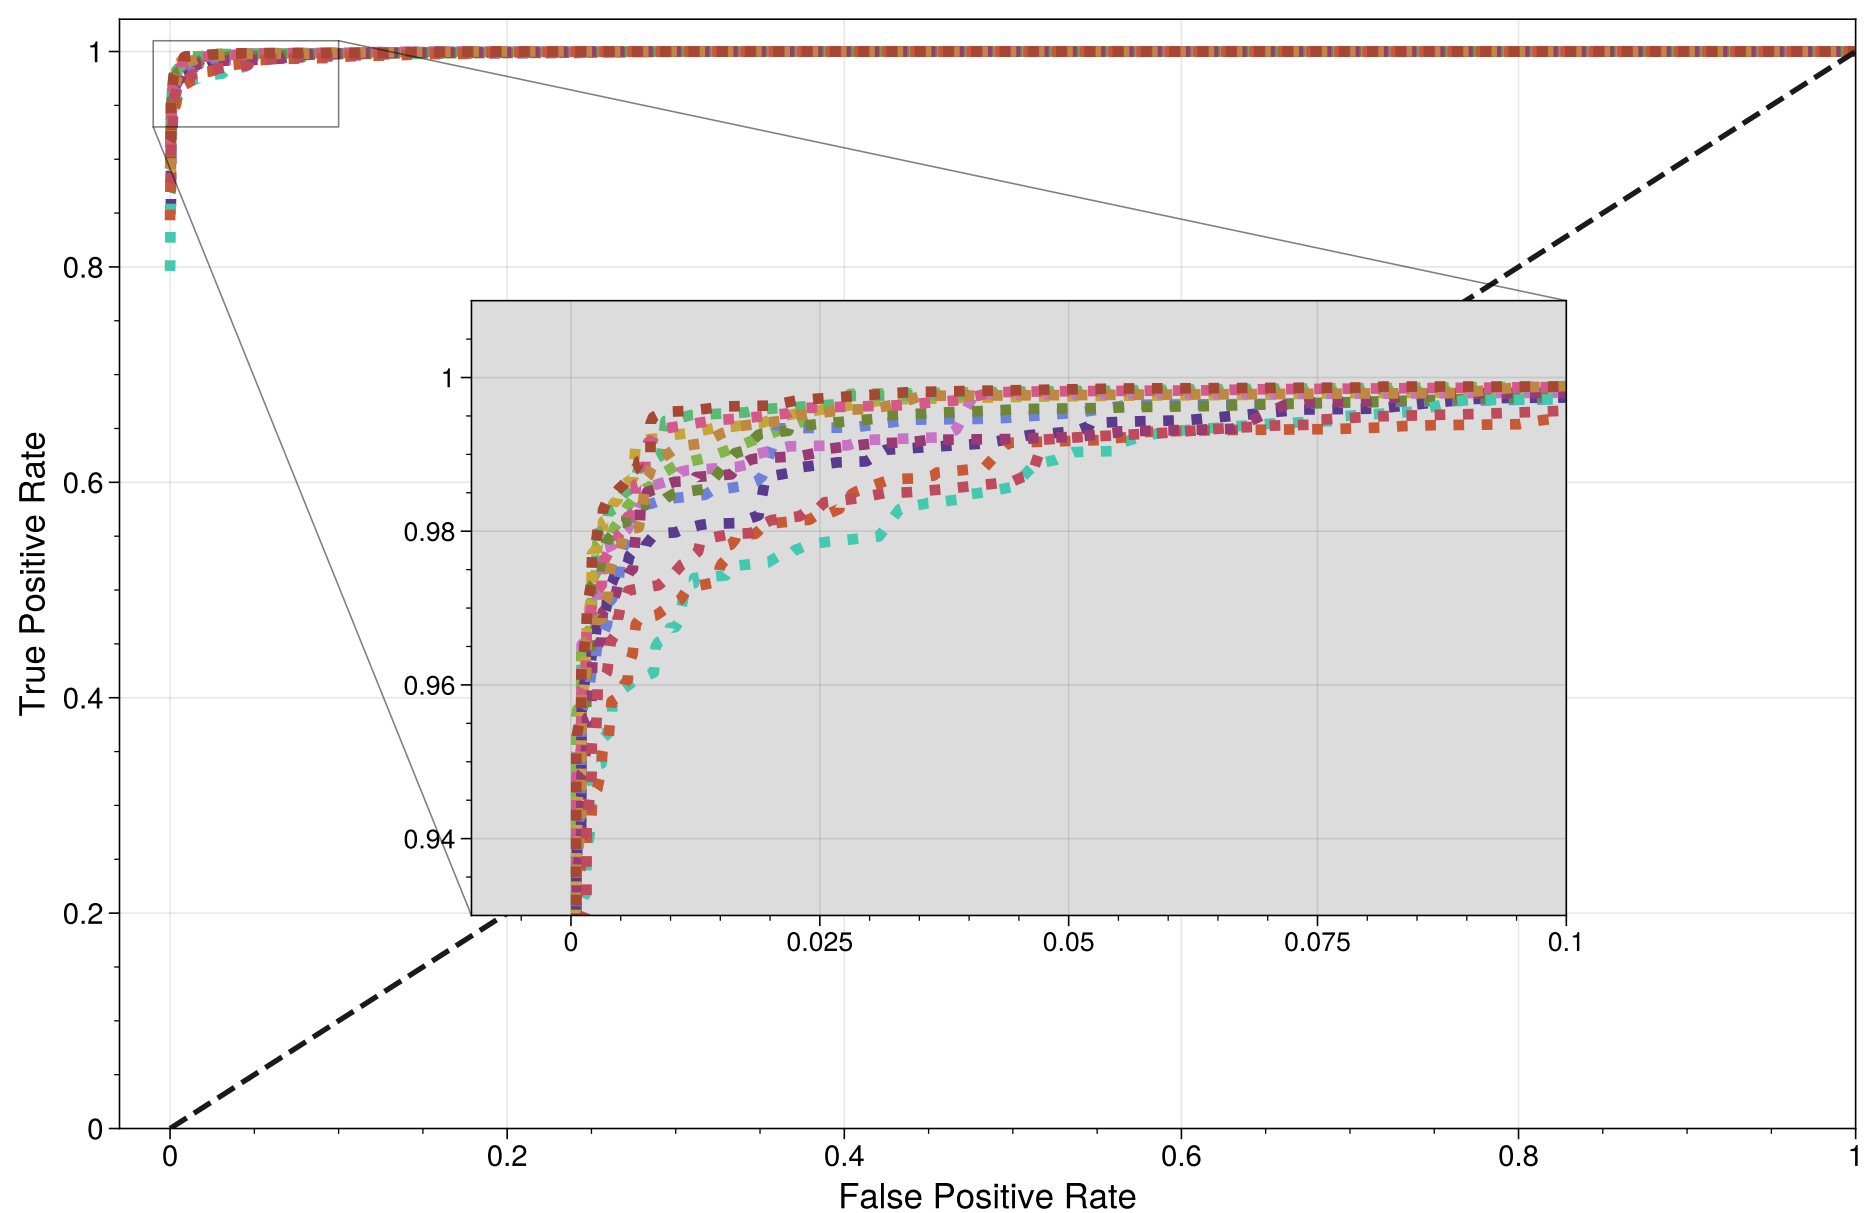

Supplement: s1 [file s1]
